# Supplementary material for: Identification of novel diagnostic panel for mild cognitive impairment and Alzheimer’s disease: findings based on urine proteomics and machine learning
Source: Alzheimers Res Ther. 2023 Nov 4;15:191. doi: 10.1186/s13195-023-01324-4 (PMC10625308; doi:10.1186/s13195-023-01324-4)
Supplement: Supplementary file 5 — Additional file 5: Fig. S5. Scatter plots of different diagnostic proteins with different cognition tests. [file 13195_2023_1324_MOESM5_ESM.zip]

Archive with 19 entries (19 files):
- additional Fig 5-ACE.pdf
- additional Fig 5-ANXA4.pdf
- additional Fig 5-C9.pdf
- additional Fig 5-CPVL.pdf
- additional Fig 5-CTSC.pdf
- additional Fig 5-CTSH.pdf
- additional Fig 5-DDC.pdf
- additional Fig 5-EHD4.pdf
- additional Fig 5-GNS.pdf
- additional Fig 5-GSTA1.pdf
- additional Fig 5-GSTA3.pdf
- additional Fig 5-PLD3.pdf
- additional Fig 5-PROCR.pdf
- additional Fig 5-PROZ.pdf
- additional Fig 5-RPS3.pdf
- additional Fig 5-SERPINA3.pdf
- additional Fig 5-SLC44A4.pdf
- additional Fig 5-SUCLG2.pdf
- additional Fig 5-TCP1.pdf
