# Supplementary material for: Identification of novel diagnostic panel for mild cognitive impairment and Alzheimer’s disease: findings based on urine proteomics and machine learning
Source: Alzheimers Res Ther. 2023 Nov 4;15:191. doi: 10.1186/s13195-023-01324-4 (PMC10625308; doi:10.1186/s13195-023-01324-4)
Supplement: Supplementary file 6 — Additional file 6: Table S1. Basic information and individual tests results of each participant. [file 13195_2023_1324_MOESM6_ESM.xlsx]

## Sheet: Sheet1
Number	diagnosis	gender	age	living status	education years	smoking	hypertension	diabetes	hyperlipidemia	heart	cerebrovasculae	familyhistory	APOE	E4	MMSE	MoCA	ADL	RAVLT_I	RAVLT_D	SCWT	BNT	DST_Forward	DST_Backward	CDT	RCFT	VFT	SDMT
AD42	AD	male	64	living with others	15	no	yes	no	no	yes	no	no	E2/E3	without E4	20	10	28	9	0		1	7	3	8	28	7	0
AD15	AD	female	64	living with others	16	no	no	no	no	no	no	yes	E3/E3	without E4	10	2	37	3	0		7	9	0	1	1	3	0
AD27	AD	female	76	living with others	12	no	no	no	yes	no	yes	yes	E4/E4	E4 carrier	18	13	26	24	2	42	24	9	3	28	15	29	34
AD13	AD	female	79	living with others	6	no	no	no	no	no	no	no	E4/E4	E4 carrier	9	4	70	4	0		8	3	2	1	1	15	0
AD50	AD	male	64	living with others	12	yes	no	yes	no	no	no	no	E3/E4	E4 carrier	7	4	47	0	0		10	3	0	0	0	2	0
AD41	AD	male	87	living with others	16	no	no	no	yes	yes	yes	no	E3/E3	without E4	13	9	41
AD21	AD	male	62	living with others	9	yes	no	yes	no	no	yes	no	E3/E3	without E4	9	2	47	0	0		3	6	0	0	0	3	0
AD20	AD	male	82	living with others	22	yes	no	no	yes	no	no	no	E3/E4	E4 carrier	1	1	54	0	0		0	3	0	0	0	0	0
AD5	AD	female	79	living with others	12	no	yes	no	no	yes	no	no	E3/E3	without E4	13	5	28	21	0		0	8	3	0	0	12	0
AD44	AD	female	77	living with others	11	no	no	no	yes	yes	no	no	E4/E4	E4 carrier	14	6	37	13	0		13	9	4	2	0	15	0
AD53	AD	male	72	living with others	16	no	no	no	no	no	no	yes	E3/E3	without E4	15		74
AD45	AD	female	63	living with others	16	no	no	no	no	no	no	yes	E3/E4	E4 carrier	6	6	44	3	0		21	6	0	1	0	10	0
AD35	AD	male	71	living with others	16	no	no	no	yes	no	no	no	E3/E4	E4 carrier	3	0	60	0	0		0	0	0	0	0	0	0
AD56	AD	female	75	living with others	11	no	yes	no	no	no	no	no	E3/E3	without E4	16	6	39	17	0	4	3	7	0	1	2	22	0
AD51	AD	female	88	living with others	11	no	yes	yes	yes	yes	no	no	E3/E4	E4 carrier	20	11	52	18	0	45	26	9	2	12	15	26	10
AD43	AD	male	80	living with others	16	no	no	yes	yes	no	no	no	E3/E3	without E4	14	9	68	15	0	8	5	6	3	3	18	6	0
AD49	AD	male	78	living with others	15	no	no	no	no	no	no	no	E3/E4	E4 carrier	19	12	28	19	0	31	21	9	3	20	36	31	20
AD48	AD	female	76	living with others	9	no	yes	no	yes	no	no	yes	E3/E3	without E4	17	6	33	9	0	6	9	9	2	17	4	17	0
AD30	AD	male	81	living with others	15	no	no	no	no	no	no	no	E3/E4	E4 carrier	6	5	33	9	0	5	11	7	3	17	18	16	3
AD52	AD	male	80	living with others	16	yes	no	no	yes	no	no	no	E3/E3	without E4	19	10	32	13	0		12	8	4	5	29	8	20
AD4	AD	male	75	living with others	16	yes	no	no	no	yes	no	yes	E3/E3	without E4	21	12	29	10	0	20	8	7	3	1	17	16	11
AD11	AD	male	71	living with others	9	yes	no	no	no	yes	no	no	E3/E3	without E4	17	7	33	21	0		11	7	0	8	6	15	0
AD54	AD	male	66	living with others	16	yes	no	no	no	yes	no	no	E3/E4	E4 carrier	7	5	32	0	0		4	5	0	2	0	5	0
AD55	AD	male	81	living with others	11	yes	yes	yes	no	no	no	no	E3/E3	without E4	23	12	28	12	0		18	8	3	17	31	15	1
AD14	AD	female	85	living with others	12	no	no	no	no	no	no	no	E3/E4	E4 carrier	15	7	49	4	0	9	9	10	3	8	7	17	0
AD57	AD	male	80	living with others	11	no	yes	yes	no	no	no	yes	E3/E3	without E4	15	12	29	5	0	38	21	6	3	22	24	20	0
AD46	AD	female	73	living with others	0	no	no	yes	no	yes	no	no	E3/E3	without E4	9	2	42	0	0		10	7	0	0	0	10	0
AD32	AD	male	86	living with others	16	no	yes	no	yes	no	no	no	E3/E4	E4 carrier	17	13	36	6	0	35	9	10	4	21	36	21	14
AD39	AD	female	85	living with others	9	no	yes	no	no	yes	no	no	E2/E3	without E4	13	4	54	0	0		8	7	3	1	0	9	0
AD40	AD	male	77	living with others	16	yes	no	no	no	no	no	no	E2/E3	without E4	20	15	27	7	0	2	12	9	5	8	12	19	23
AD12	AD	female	80	living with others	6	yes	yes	no	no	no	yes	no	E3/E3	without E4	5	3	63	2	0		8	5	2	1	0	7	0
AD34	AD	female	79	living with others	0	no	yes	yes	yes	no	yes	no	E3/E4	E4 carrier	9	3	27	2	0		10	5	2	0	0	10	0
AD38	AD	male	81	living with others	9	no	yes	no	no	yes	no	no	E3/E3	without E4	20	13
AD47	AD	female	81	living with others	11	no	yes	no	no	no	yes	yes	E3/E3	without E4	14	10	42	24	0		14	4	4	19	20	24	7
AD33	AD	female	87	living with others	0	no	yes	no	no	yes	yes	no	E3/E4	E4 carrier	11	2	55	19	0		7	6	0	0	2	12	0
AD28	AD	female	79	living with others	9	no	yes	no	yes	no	no	no	E3/E4	E4 carrier	21	15	33	8	0	42	16	8	4	26	36	23	0
AD26	AD	female	67	living with others	6	no	no	no	no	no	no	no	E3/E3	without E4	16	13	33	7	0	47	9	7	4	6	17	21	18
AD36	AD	male	85	living with others	11	no	no	yes	no	no	no	no	E3/E3	without E4	16	8	38	12	0	29	18	8	3	9	23	22	0
AD37	AD	male	85	living with others	16	no	no	no	no	no	no	no	E3/E4	E4 carrier	19	12	30	16	0	33	18	6	3	26	16	33	16
AD22	AD	female	76	living with others	16	no	no	no	yes	no	no	no	E3/E3	without E4	7	2	49	1	0		1	5	0	0	0	0	0
AD17	AD	male	82	living with others	9	yes	no	no	yes	yes	yes	yes	E3/E4	E4 carrier	11	5	62	2	0	7	11	6	2	0	0	14	0
AD18	AD	female	72	living with others	9	no	no	no	no	no	no	no	E4/E4	E4 carrier	16	8	50	15	0		11	8	3	5	14	12	0
AD19	AD	female	78	living with others	11	no	yes	no	yes	no	yes	no	E3/E4	E4 carrier	21	13	29	17	0	19	19	8	2	1	19	20	15
AD16	AD	female	71	living with others	0	no	no	yes	yes	no	no	no	E3/E4	E4 carrier	16	7	28	12	0		11	8	3	3	2	23	0
AD25	AD	female	81	living with others	12	no	yes	no	yes	yes	no	no	E3/E3	without E4	14	7	46	15	0		8	8	3	1	1	13	0
AD24	AD	female	87	living with others	16	no	no	no	yes	no	yes	no	E3/E4	E4 carrier	3	0	69	0	0		0	0	0	0	0	0	0
AD8	AD	female	80	living with others	19	no	yes	no	no	no	yes	no	E3/E3	without E4	26	15	28	3	0	41	18	6	4	19	36	28	29
AD9	AD	male	79	living with others	12	no	yes	no	no	no	no	no	E3/E4	E4 carrier	14	9	33	2	0	5	17	8	3	16	21	11	0
AD23	AD	female	84	living with others	16	no	yes	no	no	no	no	no	E3/E3	without E4	13	7	71	27	0	18	9	8	3	6	4	9	0
AD10	AD	male	67	living with others	6	yes	no	no	yes	no	no	no	E3/E4	E4 carrier	20	10	27	18	0	7	12	8	3	15	0	21	0
AD29	AD	female	74	living with others	6	no	no	no	no	no	no	no	E3/E4	E4 carrier	10	4	34	8	0		8	8	2	1	0	11	0
AD6	AD	female	82	living with others	15	no	yes	no	no	no	yes	yes	E3/E3	without E4	26	18	26	12	0	47	16	8	3	20	32	20	24
AD7	AD	female	85	living alone	6	no	no	no	no	no	no	no	E3/E3	without E4	16	8	29	8	0	17	13	8	3	10	32	23	0
AD31	AD	female	77	living with others	16	no	yes	no	yes	no	no	no	E3/E4	E4 carrier	19	7	37	18	0	24	6	8	3	12	12	20	0
AD3	AD	male	69	living with others	16	yes	no	no	yes	no	yes	no	E3/E4	E4 carrier	14	9	26	5	0	29	20	7	3	17	28	17	0
AD2	AD	male	84	living with others	12	yes	no	yes	yes	yes	yes	no	E3/E3	without E4	5	3	27	0	0		4	4	3	1	0	4	0
AD1	AD	male	81	living with others	16	yes	no	no	yes	yes	no	no	E3/E3	without E4	24	18	52	29	0	49	25	8	4	17	32	37	18
MCI4	MCI	female	85	living with others	16	no	no	no	yes	yes	no	yes	E3/E3	without E4	25	16	25	15	0	50	19	8	3	29	34	31	35
MCI15	MCI	female	73	living with others	15	no	no	no	yes	no	no	no	E2/E4	E4 carrier	28	22		37	2	49	21	8	4	22	36	19	31
MCI11	MCI	female	77	living with others	9	no	no	no	yes	no	no	no	E3/E3	without E4	26	15	23	22	0	35	16	8	4	30	22	41	14
MCI31	MCI	male	74	living with others	16	no	yes	yes	yes	no	no	yes	E3/E4	E4 carrier	28	19	20	20	0	47	20	8	3	16	24	38	23
MCI36	MCI	female	67	living with others	15	no	no	no	yes	no	no	no	E3/E3	without E4	24	21	24	19	0	48	24	8	3	3	19	38	20
MCI16	MCI	male	74	living with others	6	no	no	no	yes	no	no	no	E3/E3	without E4	27	21	20	22	1	46	27	9	4	22	30	32	18
MCI3	MCI	female	74	living with others	11	no	no	no	no	yes	no	no	E3/E4	E4 carrier	27	21	20	22	1	48	27	9	5	30	36	32	29
MCI34	MCI	female	60	living with others	9	no	no	no	no	no	no	no	E3/E4	E4 carrier	26	18	20	19	3	42	13	6	2	28	34	33	29
MCI21	MCI	male	70	living with others	9	yes	yes	no	yes	yes	no	no	E3/E3	without E4	26	21	20	21	0	50	23	8	3	30	9	23	25
MCI17	MCI	female	65	living with others	16	no	no	no	no	no	no	no	E2/E3	without E4	25	20	20	28	0	44	25	8	2	22	36	31	42
MCI18	MCI	female	62	living with others	12	no	yes	no	yes	no	no	no	E3/E4	E4 carrier	24	18	20	16	0		20	8	4	24	34	35	31
MCI35	MCI	female	78	living with others	15	no	no	no	no	no	no	no	E3/E4	E4 carrier	27	21	20
MCI12	MCI	female	74	living with others	15	no	yes	no	yes	no	no	no	E3/E4	E4 carrier	29	22	20	30	0	50	19	9	5	30	34	36	37
MCI27	MCI	female	72	living with others	11	no	yes	no	no	no	no	no	E3/E4	E4 carrier	24	19	20	22	0	46	16	5	3	25	31	24	20
MCI13	MCI	female	76	living with others	16	no	yes	yes	yes	yes	yes	no	E3/E4	E4 carrier	25	20	20	29	0		21	8	6	25	36	35	36
MCI29	MCI	female	68	living with others	16	no	yes	no	yes	no	no	no	E4/E4	E4 carrier	25	22	20
MCI42	MCI	male	74	living with others	22	no	no	no	yes	yes	no	yes	E3/E3	without E4	24
MCI40	MCI	male	54	living with others	9	yes	no	no	no	no	no	no	E3/E4	E4 carrier	24	13	20	25	0	12	19	5	2	4	2	26	14
MCI2	MCI	female	67	living with others	9	no	yes	no	yes	no	no	no	E3/E3	without E4	24	21	20	37	0	50	24	9	4	20	30	30	24
MCI6	MCI	male	81	living with others	9	yes	no	no	yes	no	yes	no	E3/E3	without E4	25	20	21
MCI1	MCI	female	83	living with others	12	no	no	yes	no	no	no	yes	E3/E3	without E4	25	18	20	23	1	38	6	9	3	0	12	24	0
MCI43	MCI	male	85	living with others	6	yes	yes	no	yes	yes	yes	no	E3/E3	without E4	15	8	23	9	0	36	7	5	3	12	21	18	0
MCI41	MCI	female	67	living with others	15	no	no	no	yes	no	no	no	E3/E4	E4 carrier	21	13	20	22	0	39	20	10	3	24	12	25	18
MCI10	MCI	female	73	living with others	6	no	no	no	no	no	no	yes	E3/E3	without E4	22	9	22	9	0	48	19	9	4	4	34	29	20
MCI37	MCI	female	74	living with others	9	no	no	no	no	no	no	no	E3/E3	without E4	18	13	23	14	0	38	10	8	3	17	34	25	25
MCI26	MCI	female	71	living with others	3	no	no	no	yes	no	no	no	E3/E4	E4 carrier	16	10	23	12	0	45	15	6	3	19	12	23	0
MCI22	MCI	female	82	living with others	16	no	no	no	yes	no	yes	no	E3/E4	E4 carrier	23	15	25	20	0	3	20	10	6	20	32	20	23
MCI33	MCI	male	76	living with others	9	yes	no	no	no	no	no	no	E3/E3	without E4	15	8	23	7	0	27	14	6	3	2	15	19	0
MCI32	MCI	male	74	living with others	16	yes	yes	no	yes	yes	yes	no	E3/E4	E4 carrier	19	20	22	14	0	41	28	10	5	26	34	26	24
MCI23	MCI	female	69	living with others	15	no	yes	no	no	no	no	no	E3/E3	without E4	25	17	20	22	2	48	25	7	4	22	12	34	20
MCI20	MCI	female	82	living with others	11	no	no	no	yes	no	no	yes	E4/E4	E4 carrier	24	20	20	24	0	47	15	9	7	30	35	28	31
MCI14	MCI	female	67	living with others	9	no	no	no	no	no	yes	no	E3/E4	E4 carrier	21	14	20	13	0	27	16	7	4	16	33	37	22
MCI9	MCI	male	75	living with others	9	yes	yes	no	no	no	no	no	E2/E2	without E4	22	12	20	20	0	45	23	8	2	24	33	23	0
MCI19	MCI	female	58	living with others	15	no	no	no	yes	no	no	no	E3/E3	without E4	27	24	20	40	1	50	22	9	5	24	34	44	33
MCI38	MCI	male	63	living with others	12	no	no	no	yes	yes	yes	no	E3/E4	E4 carrier	28	19	20	18	3		18	5	4	11		1	20
MCI24	MCI	male	80	living with others	6	no	no	no	no	yes	no	no	E3/E3	without E4	16	10	22	11	0	33	12	5	2	10	6	25	10
MCI25	MCI	female	74	living with others	4	no	no	no	no	no	no	no	E2/E2	without E4	22	17	24	14	0	48	15	8	3	2	16	23	0
MCI7	MCI	female	78	living with others	9	no	yes	no	no	no	no	no	E3/E4	E4 carrier	16	18	22	16	0	40	23	8	3	21	30	25	12
MCI28	MCI	female	76	living with others	16	no	no	no	yes	no	no	yes	E3/E4	E4 carrier	23	17	25	25	0	49	19	6	3	28	34	26	20
MCI8	MCI	female	78	living with others	15	no	no	yes	no	no	no	no	E3/E3	without E4	25	16	22	18	0	18	15	8	3	30	0	22	0
MCI5	MCI	female	78	living with others	15	no	yes	yes	no	yes	yes	no	E2/E3	without E4	25	18	20	22	0	49	17	10	3	19	30	21	20
MCI30	MCI	male	76	living with others	16	no	no	no	no	no	no	no	E4/E4	E4 carrier	20	12	25
MCI39	MCI	male	74	living with others	11	yes	yes	no	no	no	no	no	E2/E3	without E4	27	22	20	27	0	50	21	8	4	30	36	34	25
CN28	CN	female	73	living with others	9	no	yes	no	yes	yes	no	no	E3/E3	without E4	25
CN6	CN	male	61	living with others	15	no	no	no	no	yes	no	no	E3/E3	without E4	25	22	20	47	8	47	29	8	3	26	36	50	43
CN31	CN	female	65	living with others	11	no	no	no	no	no	no	yes	E3/E3	without E4	26	25	20	37	6	50	26	9	3	18	32	36	28
CN53	CN	male	66	living with others	9	yes	yes	yes	no	no	no	no	E3/E3	without E4	26	27	20
CN54	CN	female	82	living with others	15	no	no	yes	yes	no	no	no	E3/E3	without E4	25	22	32	29	2	42	25	9	2	27	32	36	25
CN26	CN	female	64	living with others	15	yes	no	no	yes	no	no	yes	E3/E3	without E4	30	29	20	44	12	47	24	8	4	30	34	54	54
CN11	CN	female	72	living alone	19	no	no	no	yes	no	no	no	E3/E3	without E4	30	25	20	40	4	50	28	10	4	30	34	46	34
CN13	CN	female	84	living alone	15	no	no	no	no	no	no	no	E3/E3	without E4	26	15	20	26	5	45	25	8	4	21	34	34	31
CN33	CN	female	62	living with others	9	no	no	yes	no	no	no	no	E3/E3	without E4	24	15	20	28	8	46	11	9	3	10	21	36	0
CN32	CN	female	73	living with others	9	no	yes	yes	yes	no	yes	yes	E2/E3	without E4	25	17	20	16	5	41	12	8	3	24	19	19	16
CN16	CN	female	83	living with others	16	no	no	yes	no	no	no	no	E3/E3	without E4	27	18	20	30	4	45	18	8	4	18	32	31	24
CN12	CN	female	65	living with others	0	no	yes	no	no	no	yes	no	E2/E4	E4 carrier	24	16	20	29	7	50	21	9	3	16	16	38	21
CN58	CN	female	67	living with others	16	no	yes	no	yes	no	no	no	E3/E3	without E4	27	26	20	47	12	50	27	7	3	24	36	46	46
CN61	CN	male	73	living with others	9	yes	yes	yes	no	no	yes	no	E3/E3	without E4	26	21	26	27	5	50	28	7	4	30	36	23	33
CN5	CN	female	75	living with others	12	no	yes	no	yes	no	no	no	E3/E4	E4 carrier	25	23	20	33	8	39	24	6	3	30	34	40	19
CN48	CN	male	73	living with others	12	no	yes	yes	yes	yes	no	no	E3/E3	without E4	26	22	20	27	4	40	29	8	4	26	33	29	35
CN10	CN	male	83	living with others	16	no	yes	no	no	no	no	no	E3/E3	without E4	25	18	22	17	2	36	14	7	3	26	36	33	5
CN34	CN	male	62	living with others	12	no	no	no	no	no	no	no	E3/E4	E4 carrier	30	23		33	11		22	9	5	25	36	52	31
CN8	CN	female	70	living with others	16	no	no	no	no	no	no	no	E3/E4	E4 carrier	26	25	20	30	3	50	27	9	4	30	34	46	43
CN47	CN	male	70	living with others	9	no	no	no	no	no	no	yes	E3/E3	without E4	28	21	20	16	4	47	26	7	3	24	36	39	36
CN51	CN	male	81	living with others	16	no	no	no	yes	no	no	no	E3/E4	E4 carrier	26	19	20	22	4	47	24	7	3	22	34	32	20
CN30	CN	male	76	living with others	15	yes	no	yes	yes	no	no	no	E3/E3	without E4	27	22	20	21	3	49	23	7	4	20	24	27	20
CN49	CN	female	59	living with others	16	no	no	no	yes	no	no	no	E2/E3	without E4	30	24	20	54	7	50	27	9	4	30	34	52	47
CN62	CN	male	79	living with others	16	yes	yes	no	yes	no	no	no	E3/E4	E4 carrier	28	21	20	26	5	50	27	8	4	28	35	51	35
CN44	CN	female	78	living with others	12	no	yes	yes	yes	no	no	yes	E3/E3	without E4	27	23	25	25	3	50	23	8	4	30	33	30	18
CN4	CN	male	59	living with others	16	no	yes	no	yes	no	no	yes	E2/E3	without E4	26
CN9	CN	female	59	living with others	16	no	no	no	yes	no	no	yes	E4/E4	E4 carrier	27
CN21	CN	female	64	living with others	19	no	no	no	yes	no	no	yes	E3/E4	E4 carrier	30	26	20	68	13	50	27	11	7	30	36	60	40
CN20	CN	female	72	living with others	16	no	yes	no	yes	no	no	no	E3/E3	without E4	28	27	20	44	11	50	27	8	4	30	36	60	39
CN19	CN	female	68	living with others	15	no	yes	no	no	no	no	no	E3/E3	without E4	28	26	20	28	4	50	26	9	4	28	36	35	22
CN39	CN	female	76	living with others	16	no	no	no	no	no	no	no	E3/E4	E4 carrier	28	25		22	3	50	23	10	2	26	36	45	19
CN40	CN	male	80	living with others	16	no	no	no	yes	no	no	no	E2/E3	without E4	29	25	20	29	3	50	29	9	2	24	34	40	25
CN41	CN	female	68	living with others	16	no	yes	no	no	yes	yes	no	E3/E3	without E4	28	26	20	48	13	43	27	8	5	28	36	46	38
CN15	CN	female	70	living with others	16	no	no	no	yes	no	no	no	E3/E3	without E4	28	24	20	31	3	50	23	9	6	30	36	44	47
CN29	CN	female	66	living with others	16	no	no	no	yes	no	no	no	E3/E3	without E4	30	29	20	57	10	50	24	10	6	30	36	46	47
CN24	CN	female	70	living with others	15	no	yes	no	yes	no	no	no	E3/E4	E4 carrier	29	26	20	30	5	50	26	8	3	26	36	53	41
CN17	CN	female	62	living with others	19	no	no	no	no	no	no	yes	E3/E3	without E4	27	27	20	46	12	45	27	10	4	26	36	45	45
CN60	CN	female	63	living with others	15	no	yes	no	yes	no	no	yes	E3/E3	without E4	30	27	20	46	7	50	27	8	2	24	34	40	20
CN46	CN	female	58	living with others	16	no	no	no	no	no	no	yes	E3/E3	without E4	29	28	20	54	10	50	26	8	4	30	36	52	50
CN1	CN	male	71	living with others	11	yes	yes	yes	yes	no	yes	no	E3/E4	E4 carrier	28	27	20	34	7	47	29	9	4	26	36	49	33
CN3	CN	female	73	living with others	15	no	yes	yes	no	no	no	no	E3/E3	without E4	28	27	20	51	11	50	26	10	6	28	36	51	38
CN36	CN	female	53	living with others	16	no	no	no	yes	no	no	no	E2/E3	without E4	28	29	20	48	12	50	28	8	4	30	36	44	50
CN22	CN	male	71	living with others	19	no	yes	yes	yes	yes	no	no	E3/E3	without E4	27	24	20	26	6	50	28	11	5	27	30	52	37
CN59	CN	female	72	living with others	9	no	yes	no	no	no	no	no	E3/E3	without E4	28	24	32	26	4	47	27	8	3	24	32	40	25
CN55	CN	female	71	living with others	9	no	no	no	yes	no	no	no	E3/E4	E4 carrier	27	21	20	43	7	50	20	10	3	26	36	35	46
CN50	CN	female	63	living with others	9	no	yes	no	yes	yes	yes	no	E3/E3	without E4	26	22	20	22	4	39	26	9	5	24	18	46	26
CN56	CN	male	61	living with others	12	yes	no	yes	no	no	yes	no	E3/E3	without E4	27	20	20	33	5	47	26	7	4	24	34	47	20
CN25	CN	male	85	living with others	16	no	yes	no	no	yes	no	no	E2/E3	without E4	28	23	24	30	3	50	25	9	4	24	36	34	24
CN37	CN	female	59	living with others	15	no	no	no	yes	no	no	no	E3/E3	without E4	27	21	20	34	6	49	29	9	4	28	36	34	17
CN38	CN	female	69	living with others	9	no	yes	yes	yes	yes	no	no	E3/E4	E4 carrier	28	22	20	35	7	50	21	9	6	24	32	25	28
CN52	CN	female	70	living with others	15	no	no	yes	yes	no	no	no	E3/E3	without E4	25	19		36	7	49	20	8	4	22	31	23	20
CN57	CN	female	70	living with others	9	no	yes	no	yes	yes	no	no	E2/E3	without E4	25	18	20	32	8	38	21	8	5	22	32	32	20
CN23	CN	female	71	living with others	3	no	no	no	no	no	no	no	E3/E3	without E4	28	22	20	34	10	41	23	9	4	24	27	34	1
CN42	CN	male	76	living with others	15	yes	yes	no	yes	no	yes	no	E2/E3	without E4	29	25	20	41	6	50	28	8	4	30	36	50	25
CN18	CN	male	61	living with others	12	no	no	no	yes	no	no	yes	E3/E3	without E4	29	24	20	34	8	48	29	12	4	24	36	39	24
CN43	CN	female	67	living with others	0	no	yes	no	no	no	no	no	E3/E3	without E4	24	18	20	21	5		17	8	3	0	19	30	5
CN14	CN	male	61	living with others	16	yes	yes	no	yes	no	yes	yes	E3/E3	without E4	27	25	20	31	6	50	29	9	5	30	36	47	49
CN45	CN	male	82	living with others	16	no	no	no	no	no	yes	no	E3/E3	without E4	26	25	20	40	3	48	30	12	6	26	36	49	28
CN7	CN	male	70	living with others	15	no	yes	no	no	yes	no	no	E3/E3	without E4	27	22	20	24	4	41	26	8	3	24	33	35	23
CN27	CN	male	70	living with others	15	yes	yes	yes	no	no	yes	no	E2/E3	without E4	29	20	20	40	9	48	28	8	4	14	36	62	29
CN2	CN	female	64	living with others	12	no	no	no	yes	no	no	no	E3/E3	without E4	27	19	20	28	4	50	19	9	3	17	34	45	27
CN35	CN	female	80	living with others	16	no	yes	no	no	no	no	no	E3/E4	E4 carrier	27	26	20	34	6	50	5	9	5	26	36	31	25
