# Supplementary material for: Identification of novel diagnostic panel for mild cognitive impairment and Alzheimer’s disease: findings based on urine proteomics and machine learning
Source: Alzheimers Res Ther. 2023 Nov 4;15:191. doi: 10.1186/s13195-023-01324-4 (PMC10625308; doi:10.1186/s13195-023-01324-4)
Supplement: Supplementary file 10 — Additional file 10: Table S5. Spearman correlation between diagnostic proteins and cognition tests. Relative correlation coefficient ρ and significance p (two-sided). [file 13195_2023_1324_MOESM10_ESM.xlsx]

## Sheet: sheet 1
Spearman correlation
		DDC	CTSC	EHD4	GSTA3	SLC44A4	GNS	GSTA1	ANXA4	PLD3	CTSH	HP	RPS3	CPVL	TUBB	SUCLG2	PROCR	TCP1	ACE	FLOT2	PROZ	C9	SERPINA3
MMSE	ρ	.186*	-.249**	-.197*	.199*	-0.136593	-.274**	.178*	.173*	-0.148851	-.197*	-0.0950481	.202**	-.169*	-0.0462037	.158*	-.201*	-0.0483796	0.0912521	0.0676178	.157*	-.194*	-.219**
	sig. (two sided)	0.0180165	0.00141607	0.0118586	0.0109701	0.0830566	0.000416634	0.0235995	0.0277391	0.0586995	0.0121949	0.228929	0.00998393	0.032077	0.559331	0.0441214	0.0103889	0.54096	0.248145	0.392579	0.045452	0.0132523	0.00509448
MoCA	ρ	.226**	-.269**	-.162*	.193*	-0.136751	-.289**	.216**	.187*	-.162*	-.232**	-0.0842285	.207**	-.164*	-0.0481245	0.0829954	-.214**	-.168*	0.118287	0.0666936	0.136097	-.184*	-.217**
	sig. (two sided)	0.00440962	0.000654431	0.0425284	0.0151918	0.0876698	0.000244664	0.00662779	0.0192491	0.0424625	0.00340509	0.294265	0.00916174	0.0398216	0.549489	0.301415	0.00722316	0.0352102	0.140087	0.406587	0.0892107	0.0212743	0.00638879
ADL	ρ	-.232**	.302**	.212**	-0.138291	0.133234	.223**	-0.141707	-.174*	0.156458	.251**	0.0912395	-.251**	.191*	0.00452392	-0.0887211	0.1236	0.0642457	-0.0866188	-0.0793919	-0.0686664	0.100531	.167*
	sig. (two sided)	0.00384666	0.000151134	0.00866173	0.0882429	0.100627	0.00552206	0.0805898	0.0313369	0.0534436	0.0017835	0.262008	0.00173812	0.0181905	0.955741	0.275461	0.12797	0.430127	0.287043	0.329307	0.399012	0.216295	0.0392553
RAVLT_I	ρ	.260**	-.273**	-.198*	0.148983	-.240**	-.289**	.208*	0.131049	-0.123405	-.191*	-0.0411991	.173*	-0.147281	-0.0361095	0.133065	-.199*	-0.079054	.176*	0.0121507	0.111872	-0.128033	-.187*
	sig. (two sided)	0.00132237	0.000727689	0.0150584	0.068825	0.00310349	0.000341405	0.0106481	0.109934	0.132452	0.0191986	0.61667	0.0340762	0.0720896	0.660884	0.104524	0.0144862	0.336242	0.0309471	0.882677	0.172893	0.11843	0.0217267
RAVLT_D	ρ	.170*	-.327**	-.219**	.162*	-0.146907	-.272**	.201*	.166*	-0.151878	-0.156844	-0.0845006	.205*	-.203*	-0.0652976	.226**	-.231**	-0.118034	.177*	-0.00465755	0.114217	-.218**	-.179*
	sig. (two sided)	0.0372892	4.38509e-05	0.00703614	0.0470417	0.0728233	0.00075269	0.0137994	0.0426252	0.0635477	0.0552695	0.303903	0.0118674	0.0129418	0.427262	0.00535322	0.00439386	0.150277	0.0304202	0.954891	0.164007	0.00736301	0.0280699
DST-Backward	ρ	0.118375	-.201*	-0.155487	0.00494821	-0.0293002	-.303**	0.133849	0.151611	-0.0276663	-0.0866677	0.0594623	0.127799	-0.13138	0.123842	0.0684416	-.174*	-0.0485839	0.0882	0.0639698	-0.0845847	-0.151365	-.242**
	sig. (two sided)	0.149093	0.0136348	0.0574381	0.952079	0.721895	0.000162791	0.102478	0.0640205	0.736817	0.291624	0.469797	0.119111	0.10903	0.131076	0.405296	0.032842	0.554922	0.283145	0.43674	0.303421	0.0644581	0.00280038
SCWT	ρ	0.0961816	-.210*	-.196*	0.176942	-.295**	-.221*	.217*	0.101362	0.0140806	-0.127596	-0.115202	.191*	-0.0296013	-0.0200729	.199*	-0.0723769	-0.0883377	0.128759	0.00428378	0.114013	-0.110933	-0.154707
	sig. (two sided)	0.300164	0.0226959	0.0338566	0.0552667	0.00116948	0.0161254	0.0184507	0.274758	0.879713	0.168535	0.21415	0.0378332	0.750334	0.829184	0.0307831	0.436058	0.341483	0.164656	0.96328	0.21895	0.231733	0.0943764
DST-Forward	ρ	0.0915418	-0.146239	-0.0892387	0.0617266	-0.154961	-.188*	0.0974733	0.0334618	0.00248968	-0.0661215	-0.0480702	0.114652	-0.118038	0.132857	0.0595971	-0.0351334	0.00203146	0.110378	-0.00552383	-0.0394188	-0.100326	-0.10268
	sig. (two sided)	0.265229	0.0741504	0.277492	0.453023	0.0582974	0.0210084	0.235369	0.68437	0.975878	0.42144	0.55912	0.162396	0.150264	0.105072	0.468789	0.669506	0.980317	0.178736	0.946512	0.631991	0.221881	0.211171
SDMT	ρ	.194*	-.209*	-0.158506	0.145395	-0.101405	-.287**	.226**	0.143327	-.172*	-0.151463	-0.0611707	0.129738	-0.0378705	-0.0384008	.162*	-0.159811	-0.157927	0.0993891	0.0668128	0.14883	-0.139328	-.242**
	sig. (two sided)	0.0176553	0.010322	0.0527061	0.0758528	0.216926	0.000368108	0.00532749	0.0801605	0.035794	0.0642844	0.45711	0.113568	0.645443	0.640822	0.0470728	0.0507627	0.0535876	0.226249	0.416591	0.0691133	0.0890479	0.00281098
BNT	ρ	.171*	-0.146586	-0.107473	.184*	-0.051775	-.199*	.253**	0.108923	-0.137023	-0.151448	-0.0931629	0.0675903	-0.0554181	-0.00934198	0.109609	-0.0965556	-0.159213	0.14485	-0.0464447	.216**	-0.138202	-0.127396
	sig. (two sided)	0.0368259	0.0734599	0.190516	0.0244974	0.529199	0.0145184	0.00177566	0.184569	0.0945153	0.0643108	0.256823	0.411177	0.500585	0.909665	0.181801	0.239829	0.0516467	0.0769701	0.572498	0.00791983	0.0916871	0.12029
VFT	ρ	.199*	-.292**	-.170*	0.11184	-0.143193	-.287**	.182*	.177*	-.208*	-0.129389	-0.0585976	.184*	-0.142822	-0.0290783	.173*	-.187*	-0.142207	0.102485	-0.000491796	.164*	-.202*	-.197*
	sig. (two sided)	0.0145645	0.000281811	0.0378487	0.173017	0.0804478	0.000376853	0.0260011	0.0298221	0.0104702	0.114551	0.476292	0.0244908	0.0812434	0.723916	0.0345878	0.0216674	0.0825746	0.212043	0.995234	0.0450726	0.0131812	0.0154616
CDT	ρ	.249**	-.176*	-.259**	.231**	-.186*	-.316**	.264**	0.0914329	-0.147232	-.183*	0.00713516	0.100482	-0.0822083	-0.0245219	0.0454196	-0.153822	-0.0621525	0.0420887	0.0368835	0.0551486	-0.111925	-0.0825648
	sig. (two sided)	0.00210777	0.0311451	0.0013896	0.00445383	0.0228847	8.17891e-05	0.00107399	0.265801	0.0721867	0.0249988	0.930944	0.22116	0.317256	0.765808	0.581013	0.0601939	0.449905	0.609075	0.654079	0.502673	0.172687	0.315155
RCFT	ρ	.206*	-0.153832	-.219**	0.114363	-0.012324	-0.15712	.169*	0.0949079	-0.110386	-0.102206	-0.0149466	0.0516698	-0.105399	-0.0530878	0.0633633	-.170*	-0.158896	.214**	0.0250643	0.159854	-0.143734	-.195*
	sig. (two sided)	0.0115316	0.0610535	0.00725795	0.164898	0.881417	0.0556661	0.039514	0.249591	0.180185	0.214857	0.856431	0.531435	0.200797	0.520214	0.442662	0.0383891	0.0529217	0.00870453	0.76157	0.05149	0.0803229	0.0169802
