# Supplementary figures and images for: Identification of novel diagnostic panel for mild cognitive impairment and Alzheimer’s disease: findings based on urine proteomics and machine learning
Source: Springer Nature journal article supplement (doi:10.1186/s13195-023-01324-4), 2023-11-04

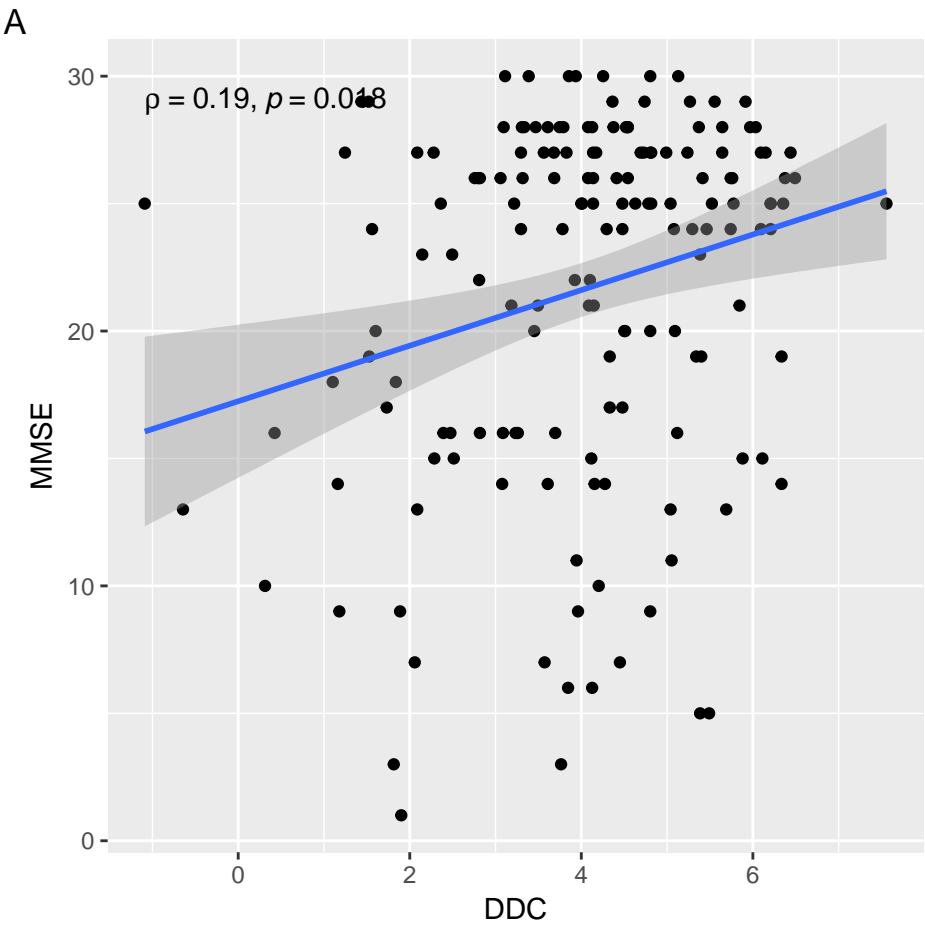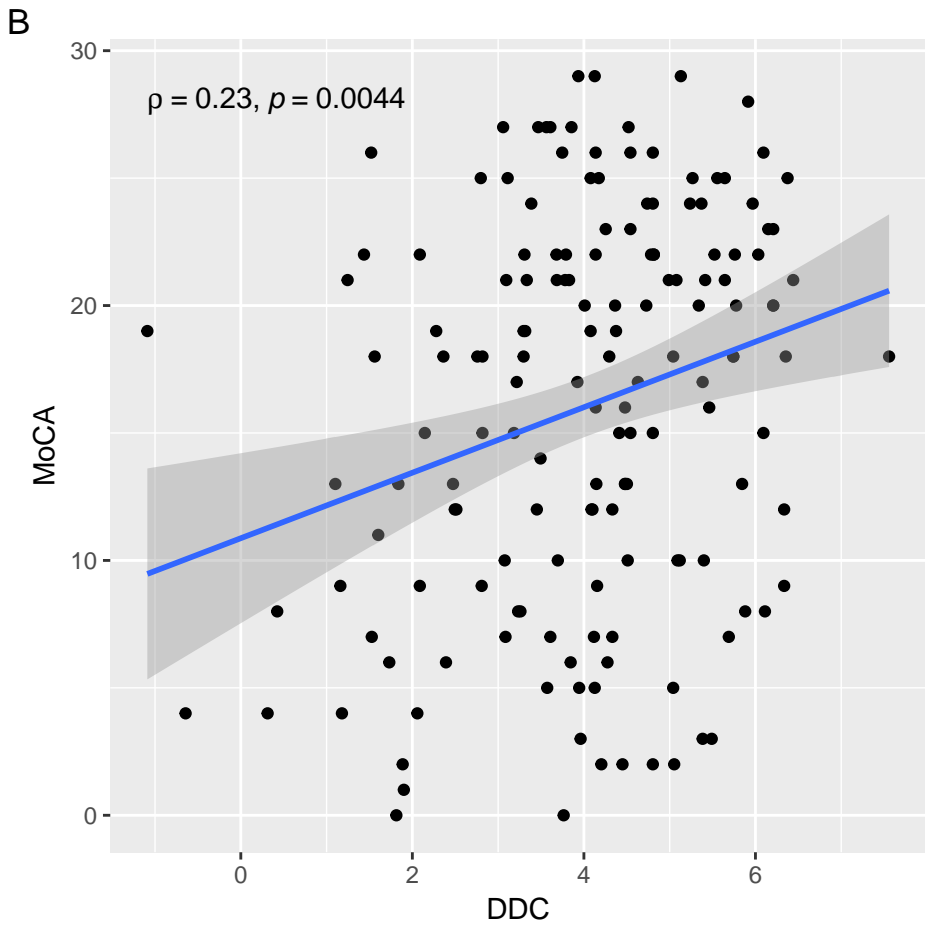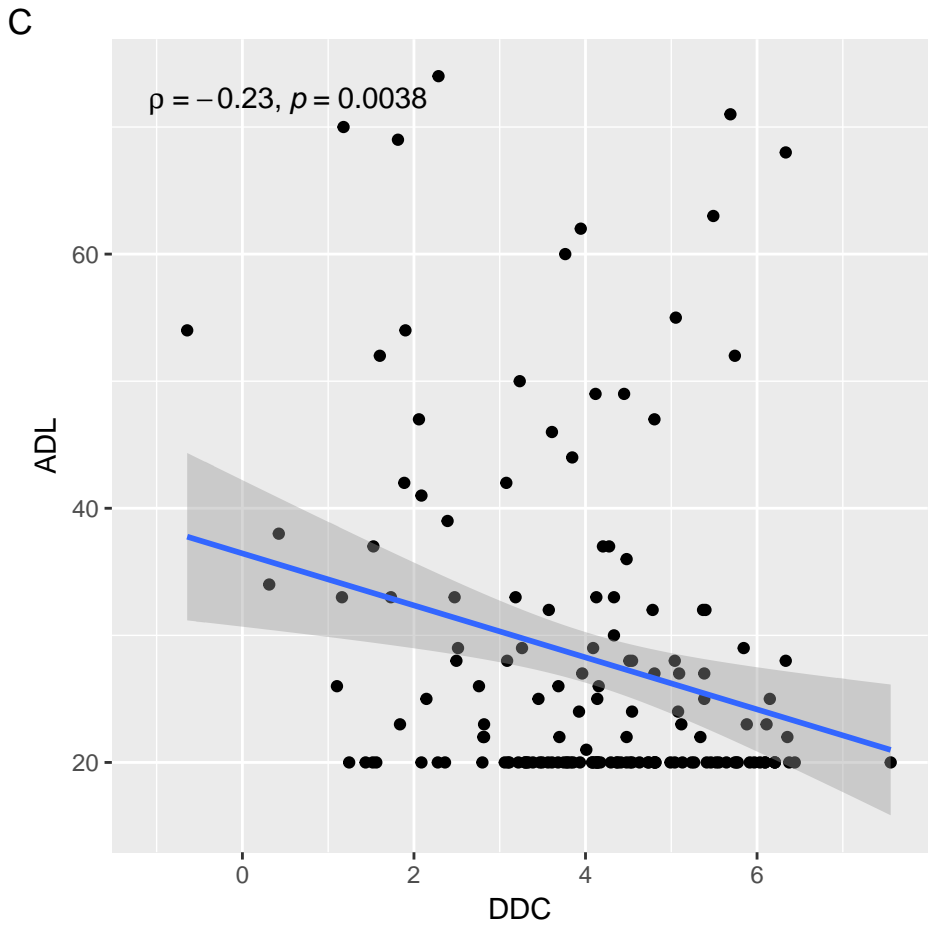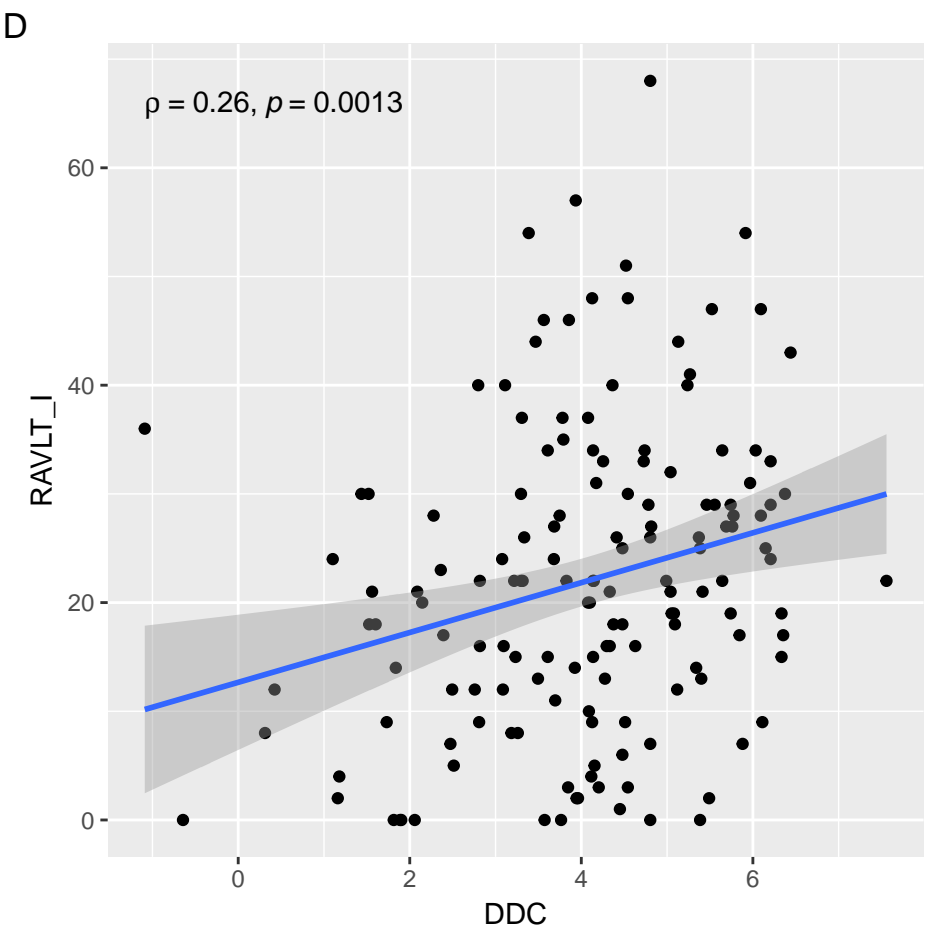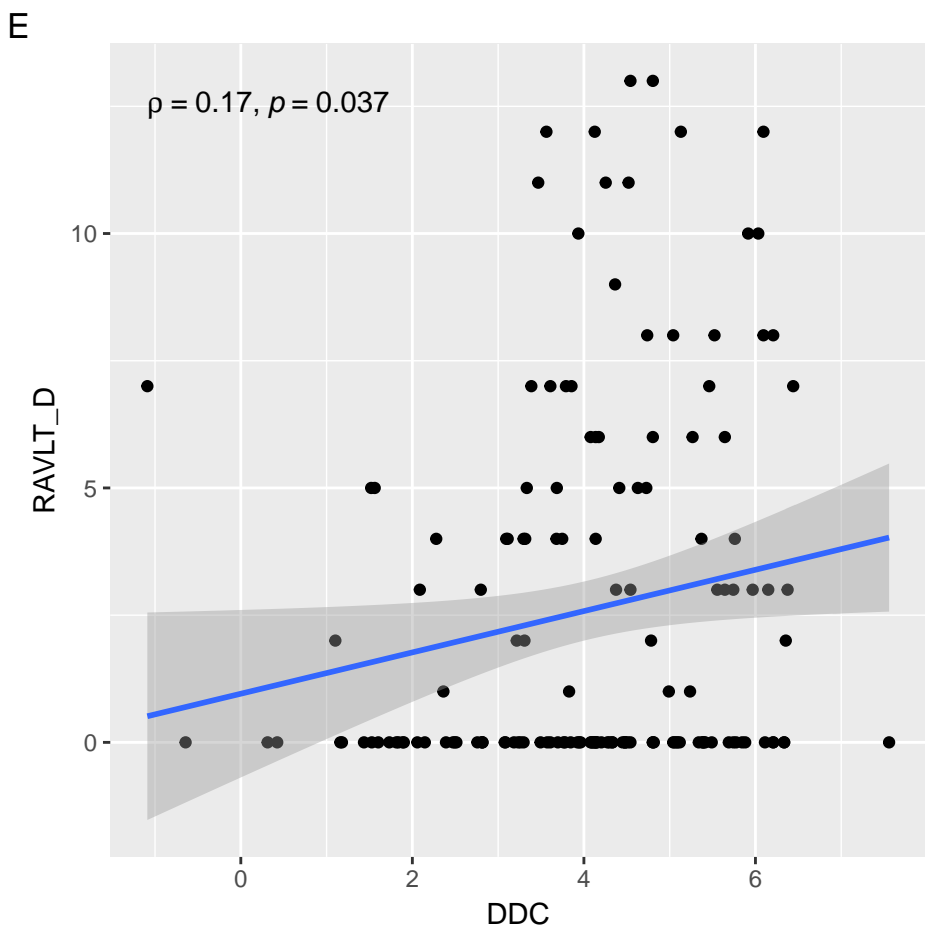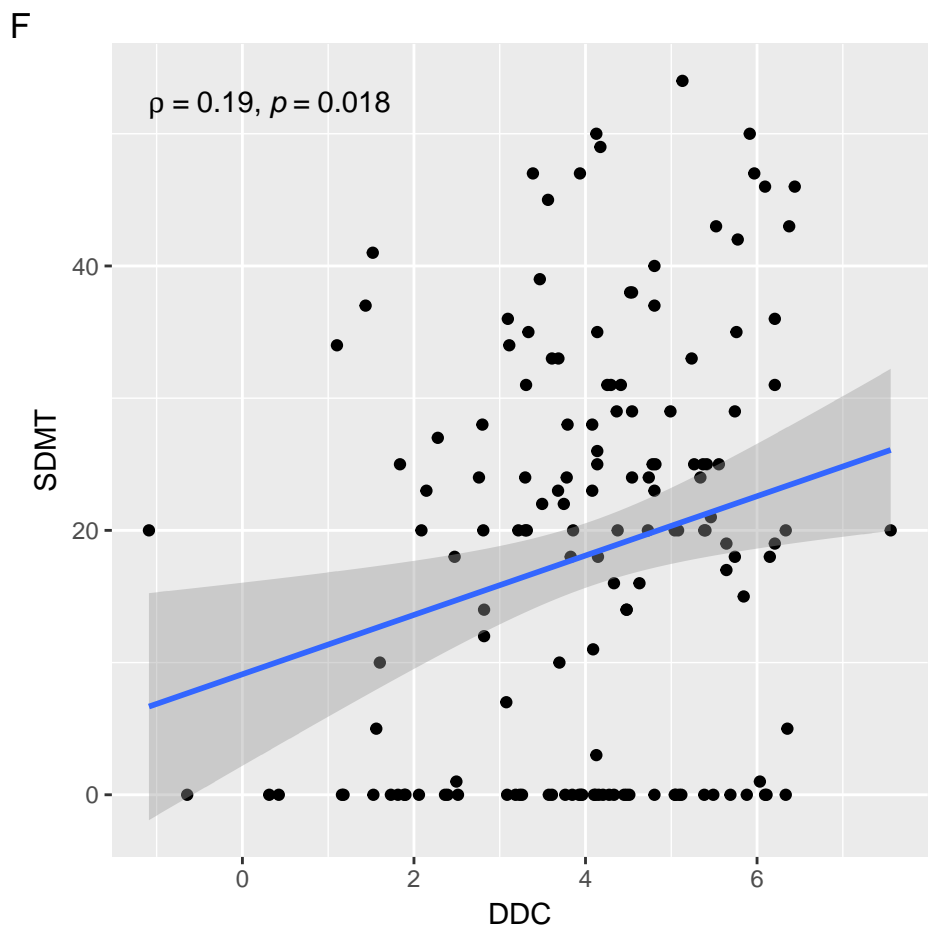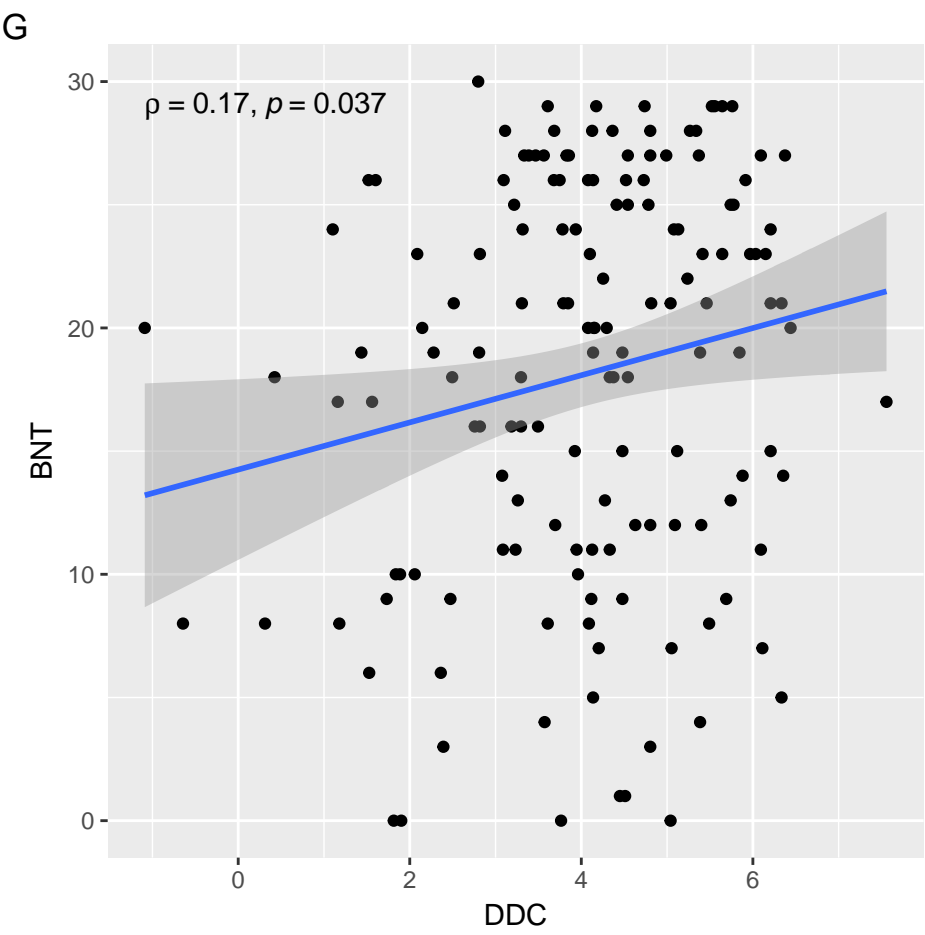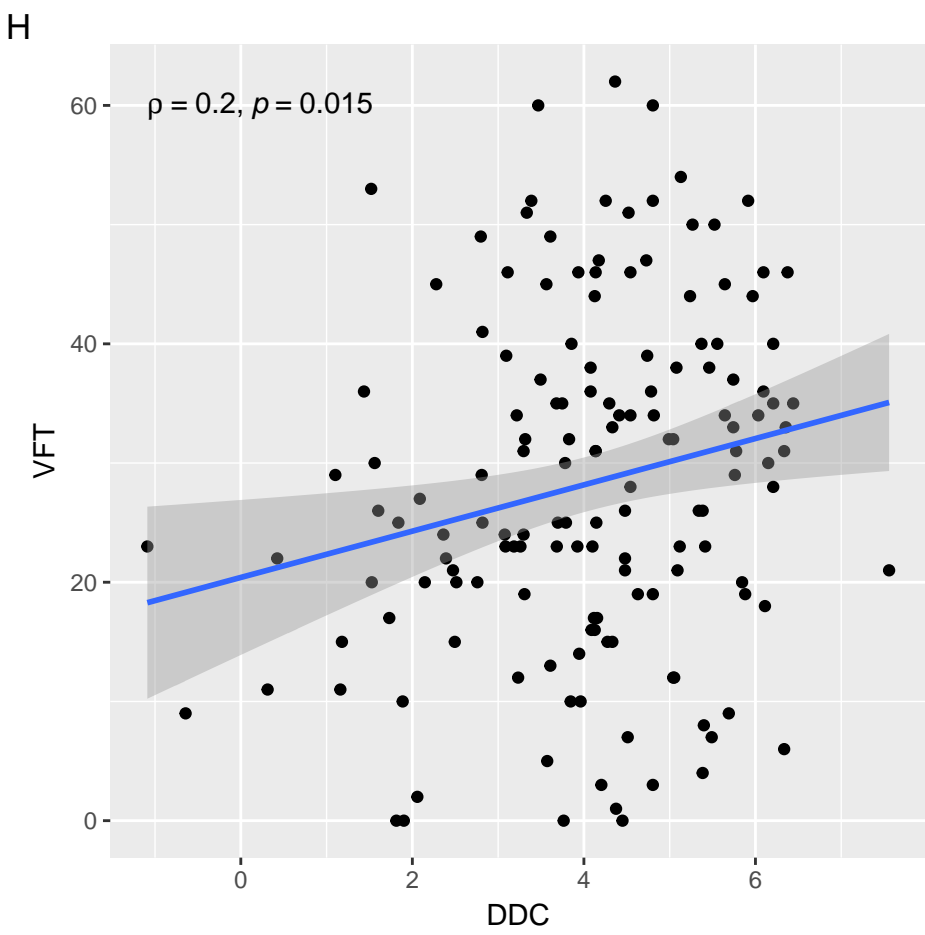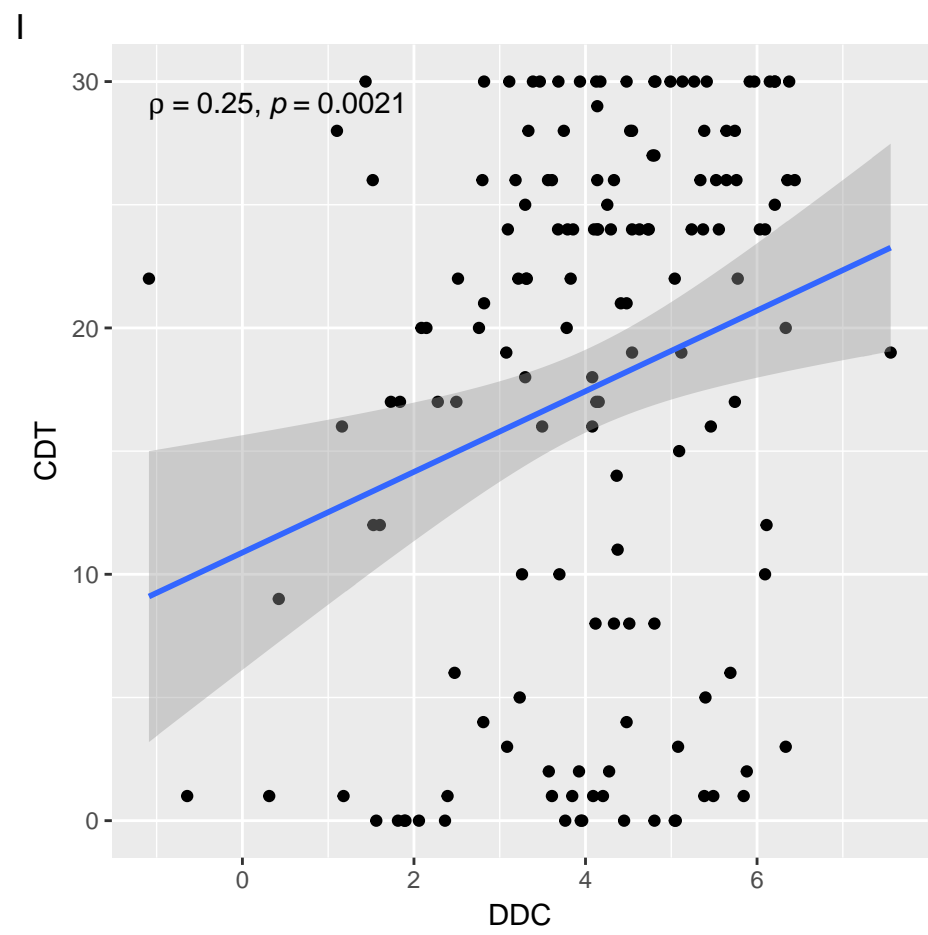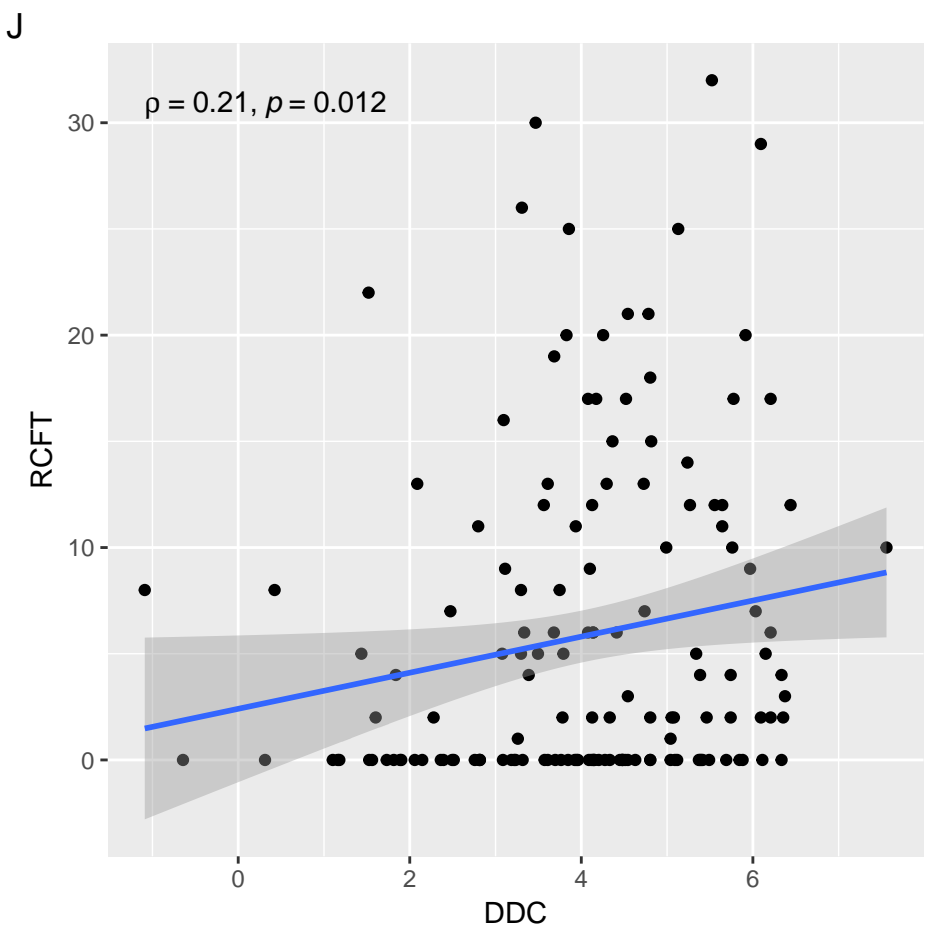

Supplement: MOESM5 [file 26264902]

A

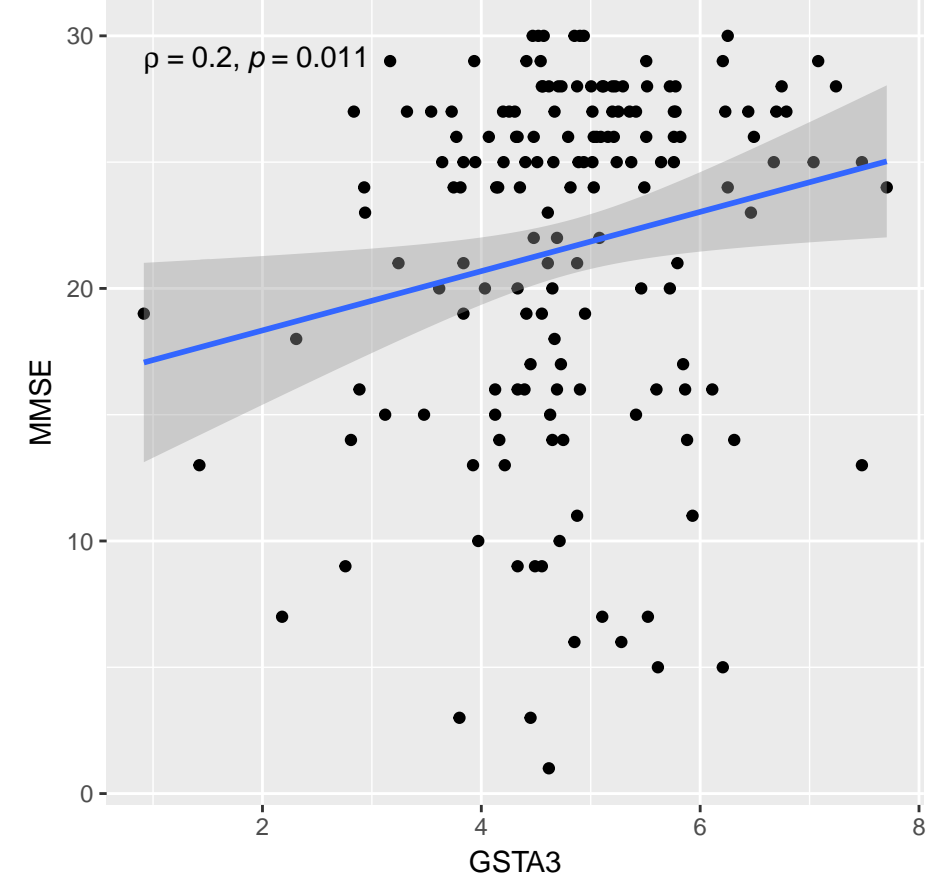

B

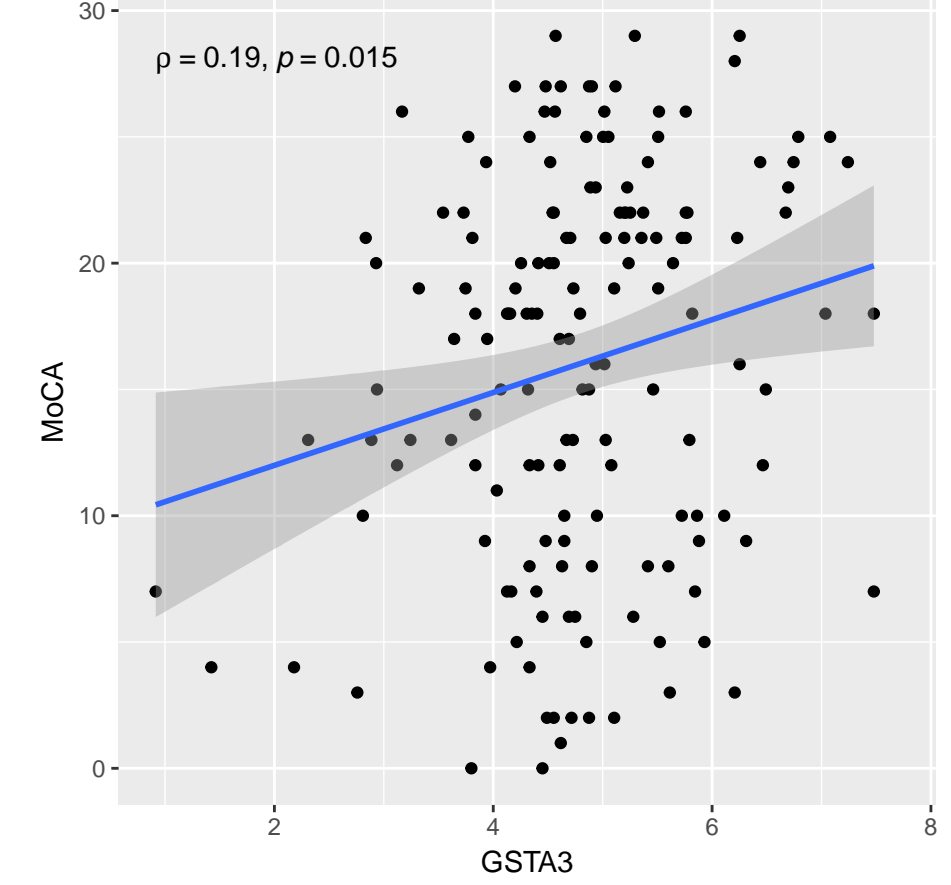

C

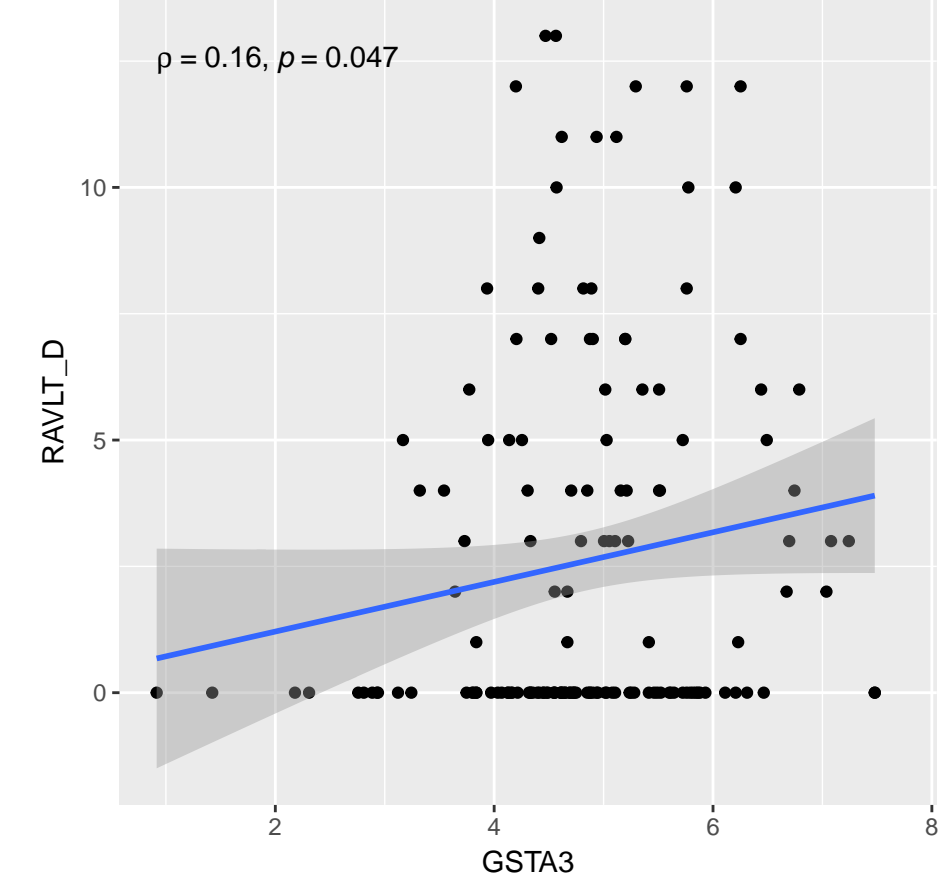

D

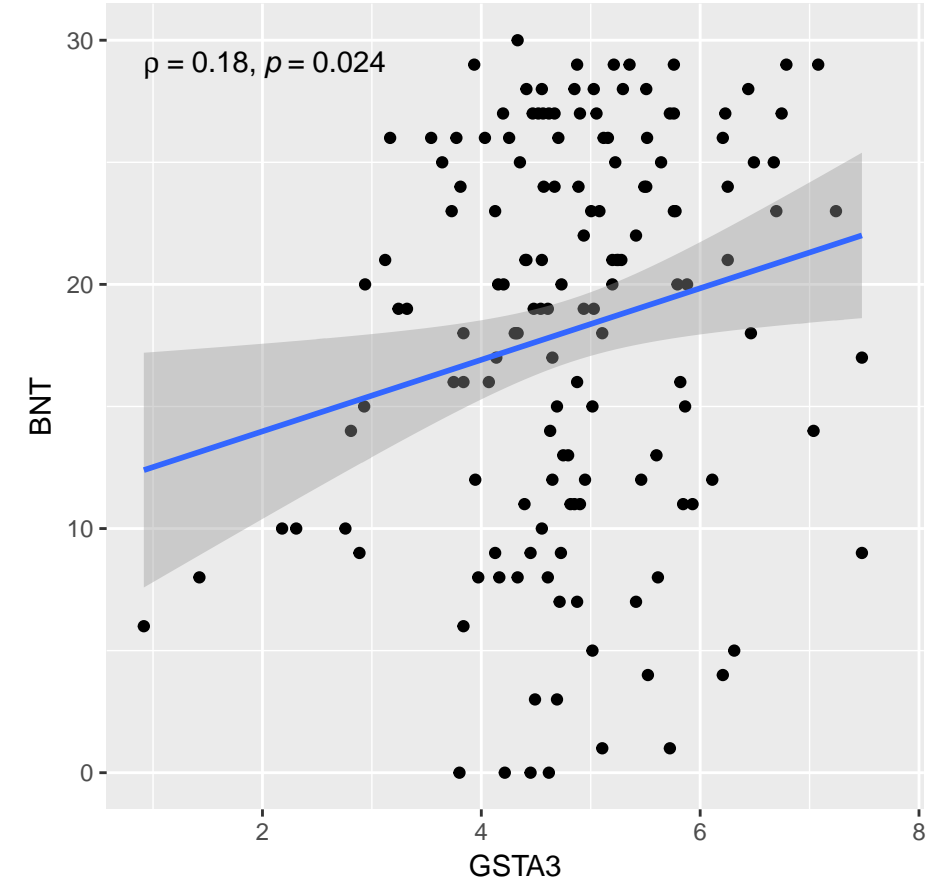

E

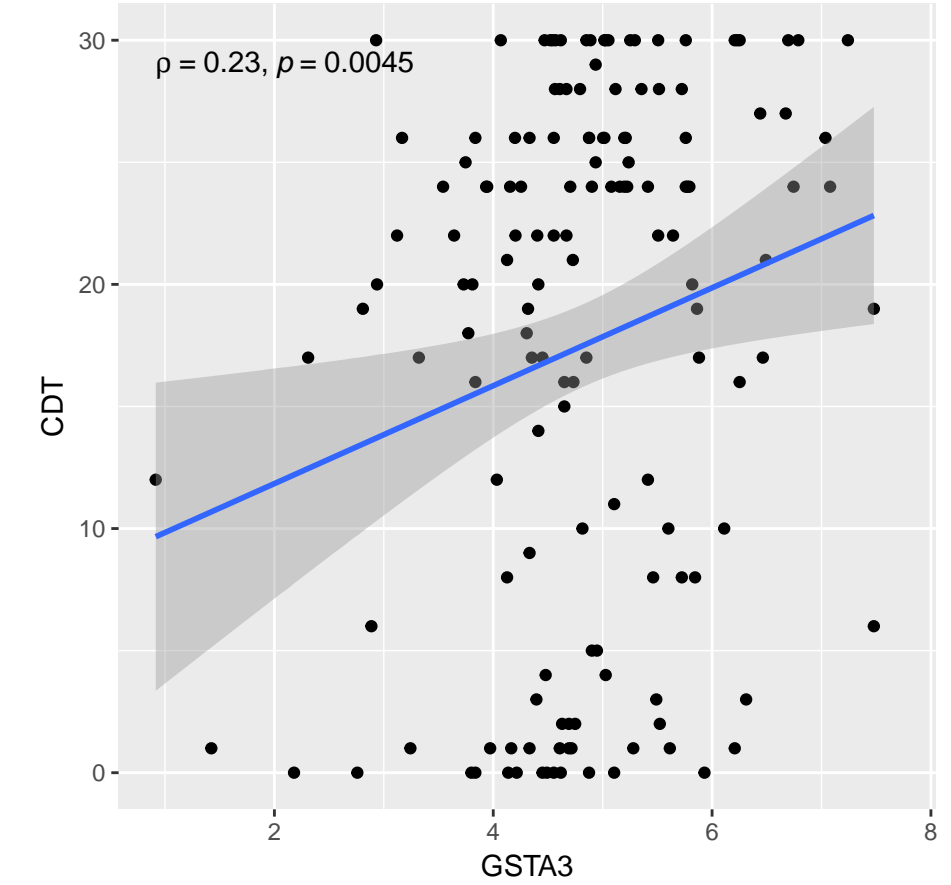

Supplement: MOESM5 [file 26264902]

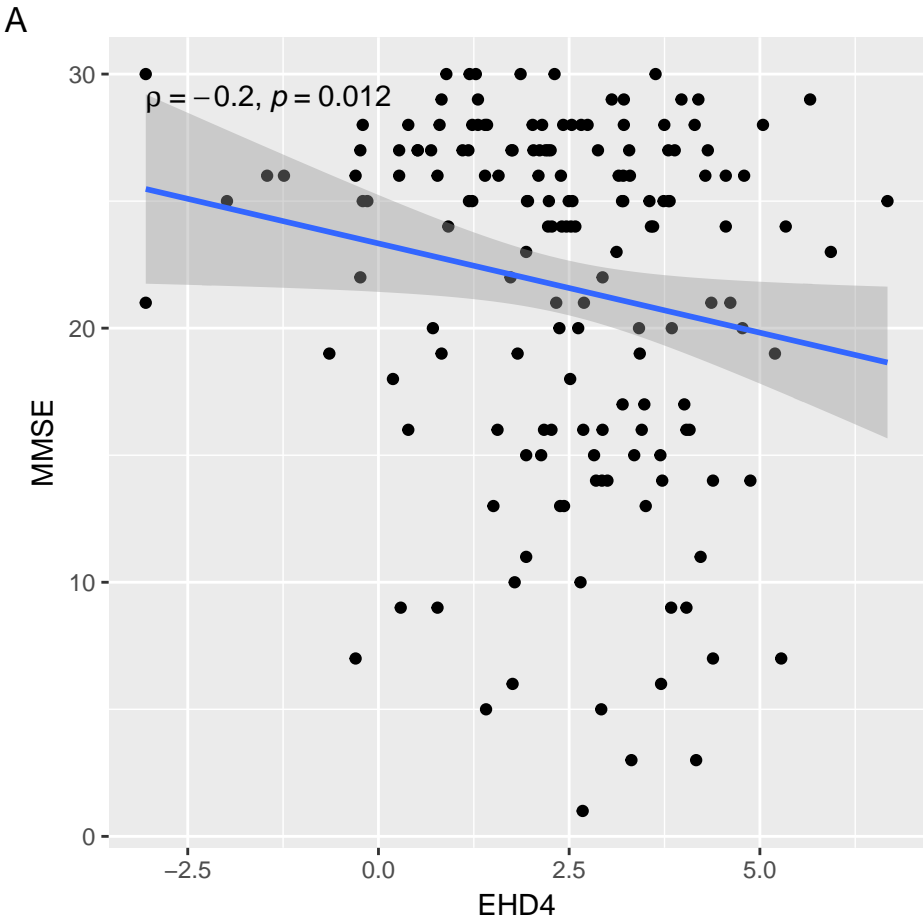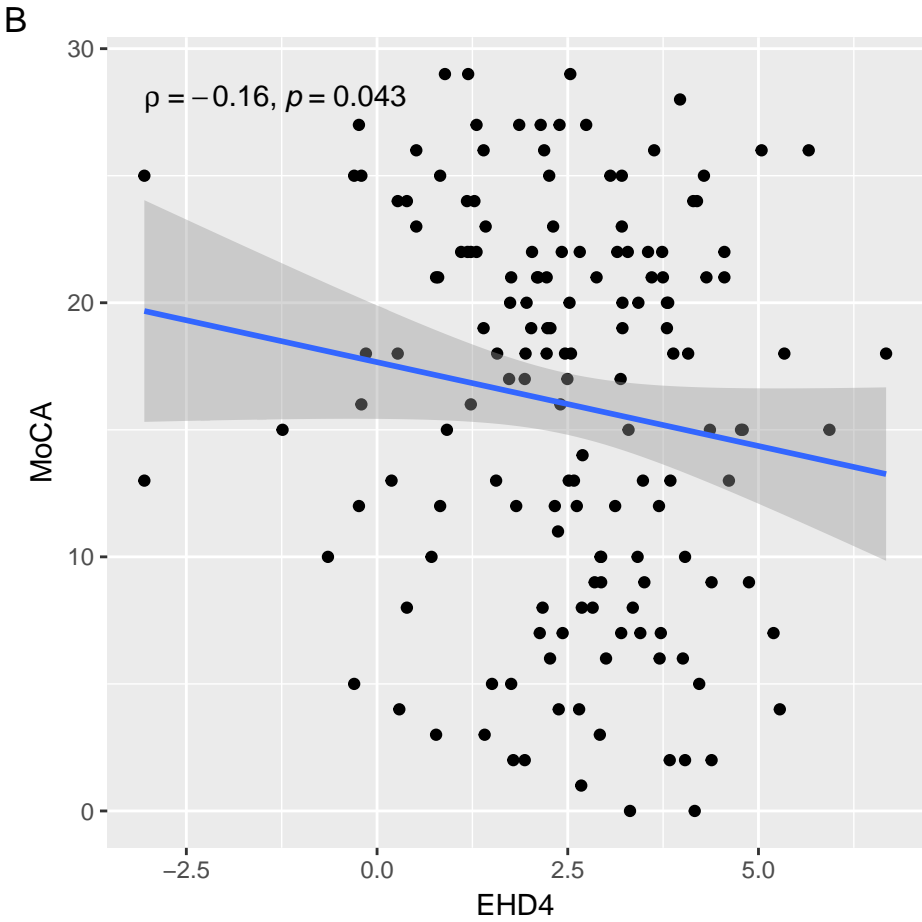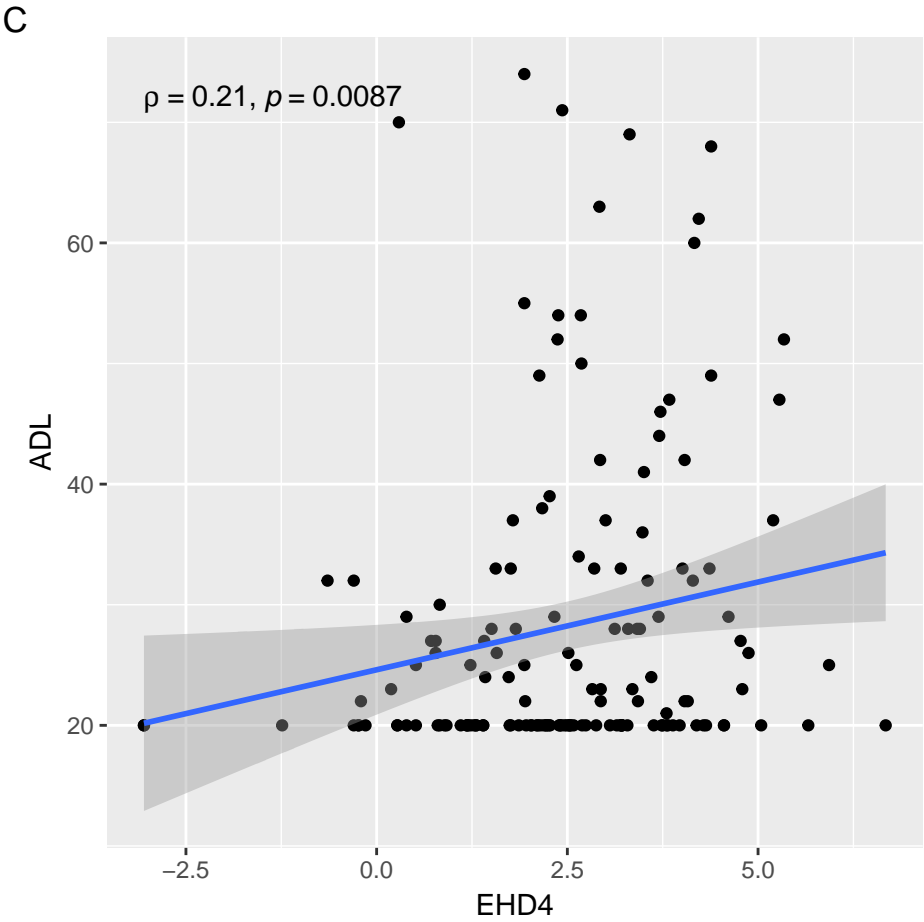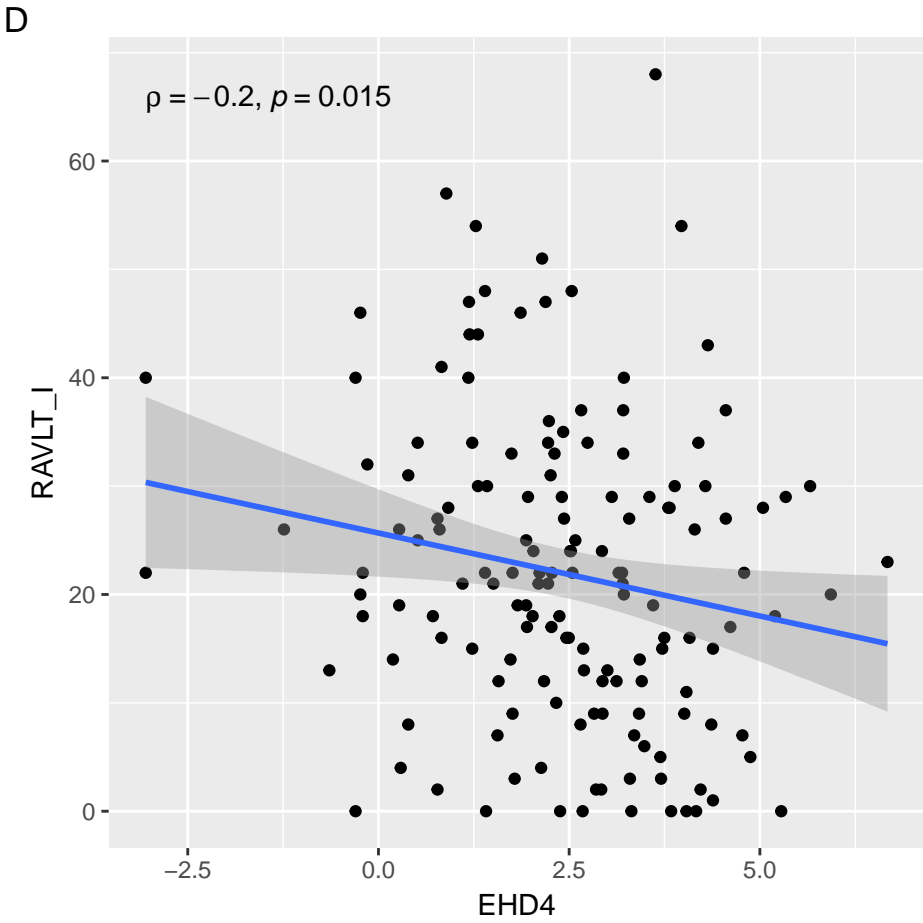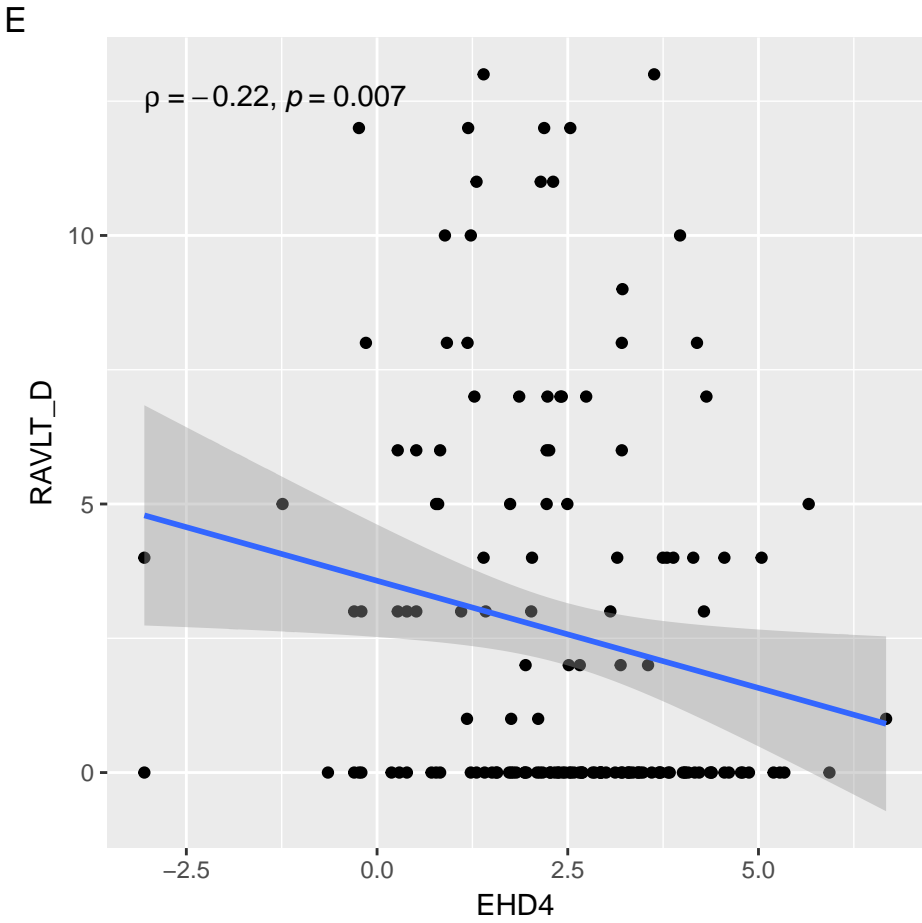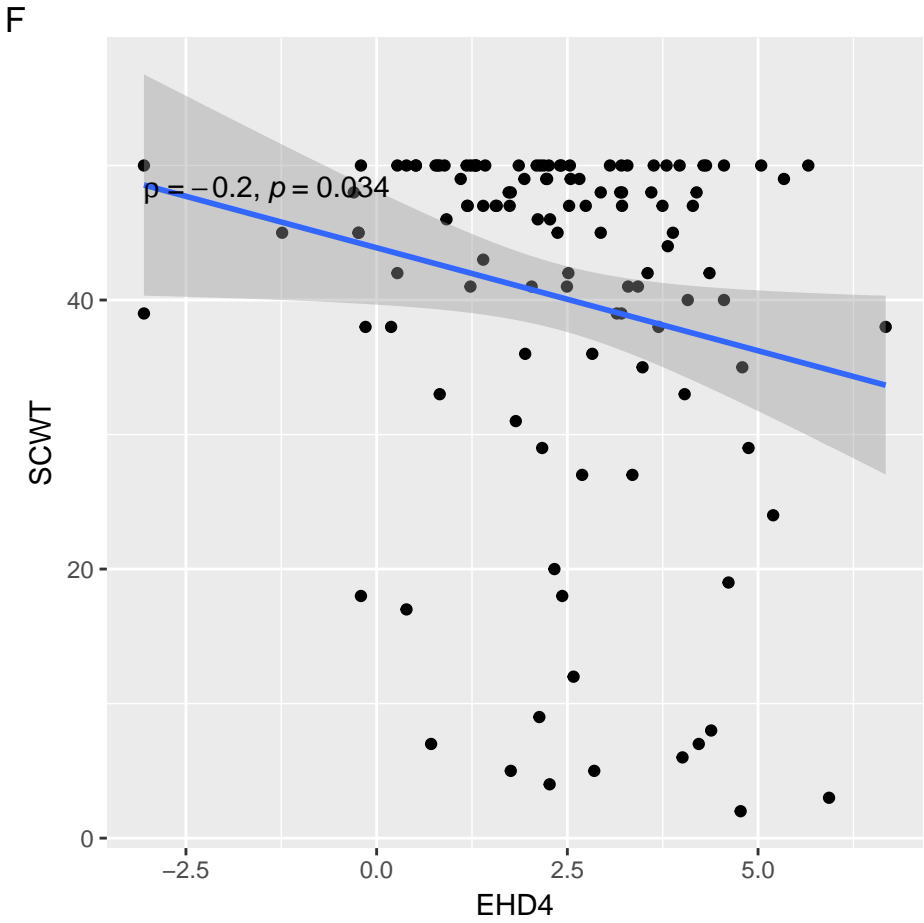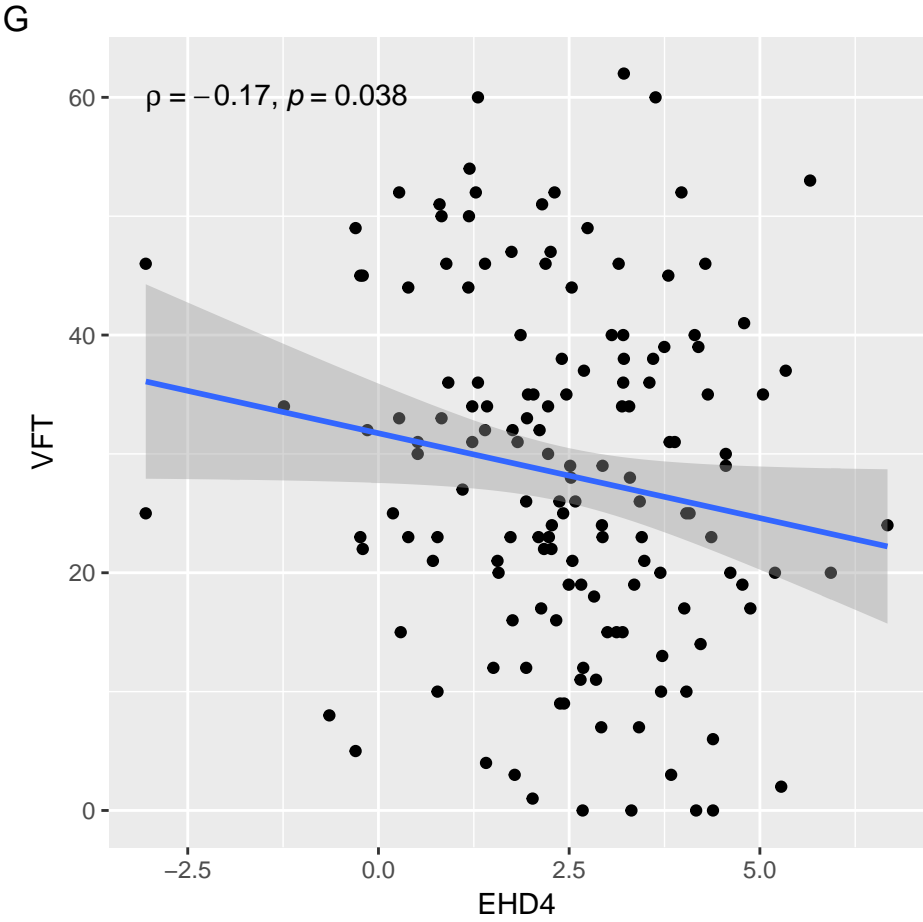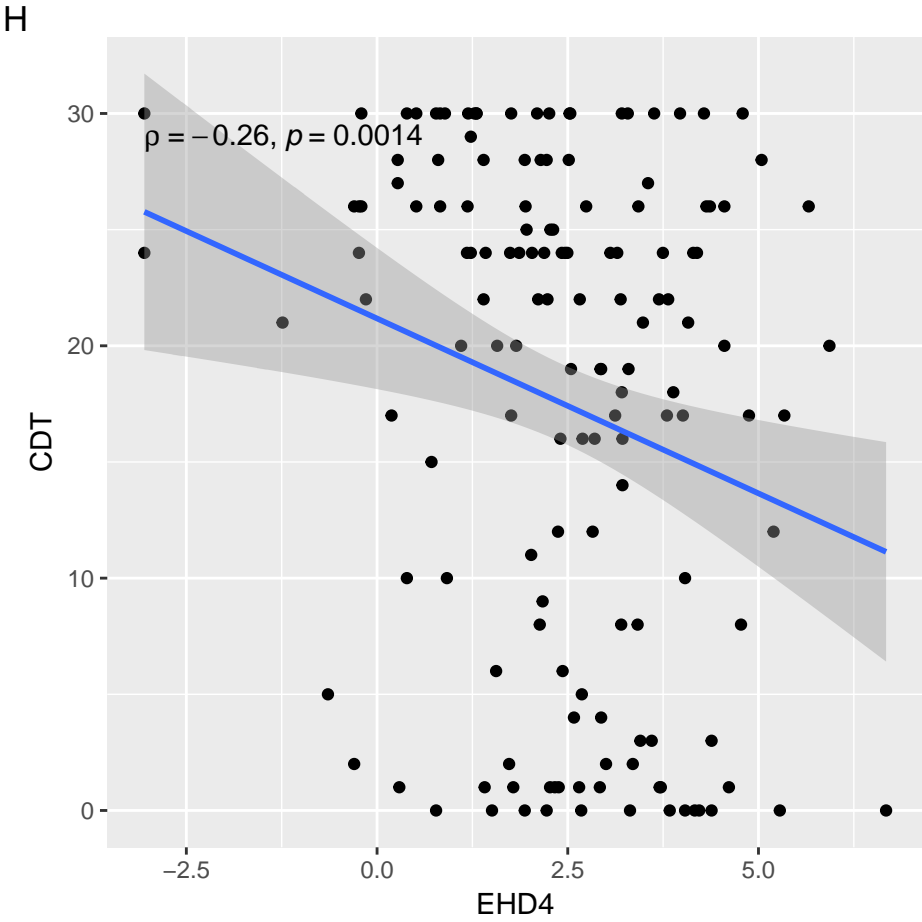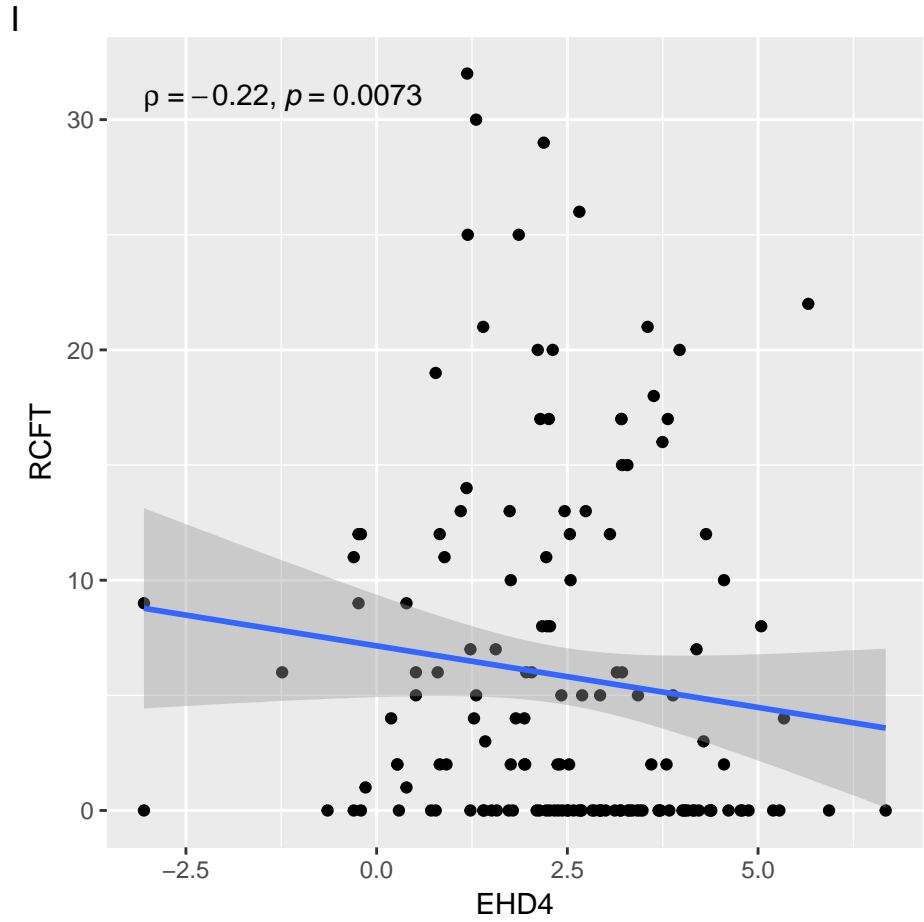

Supplement: MOESM5 [file 26264902]

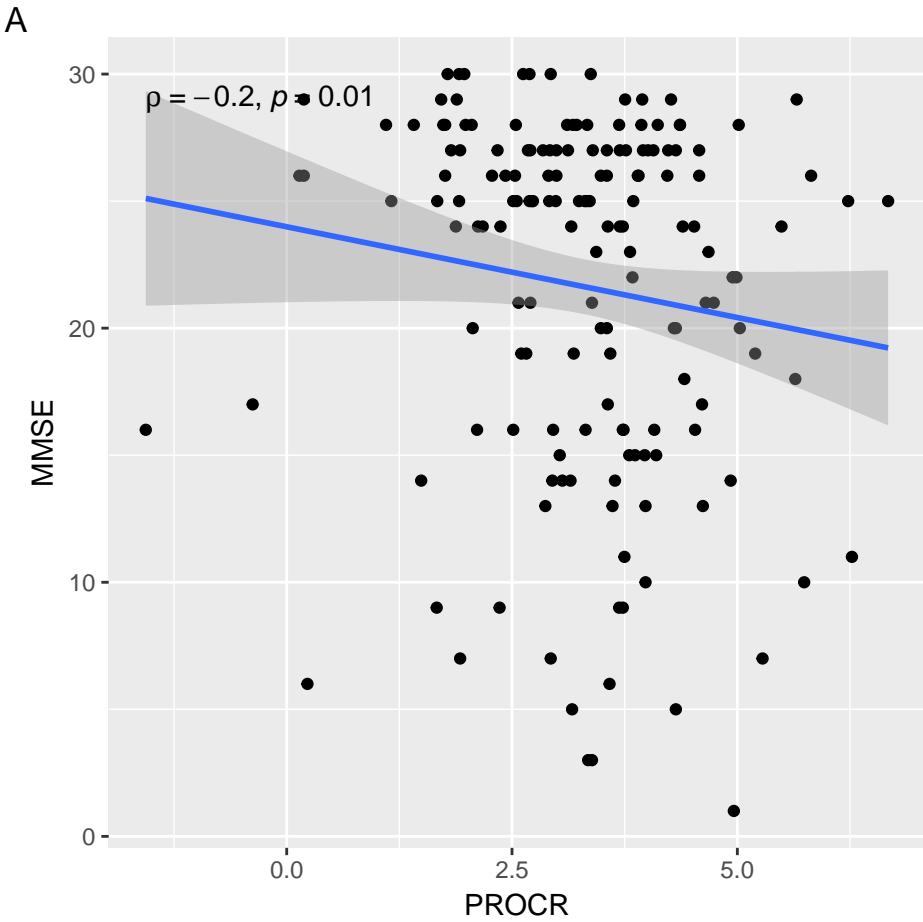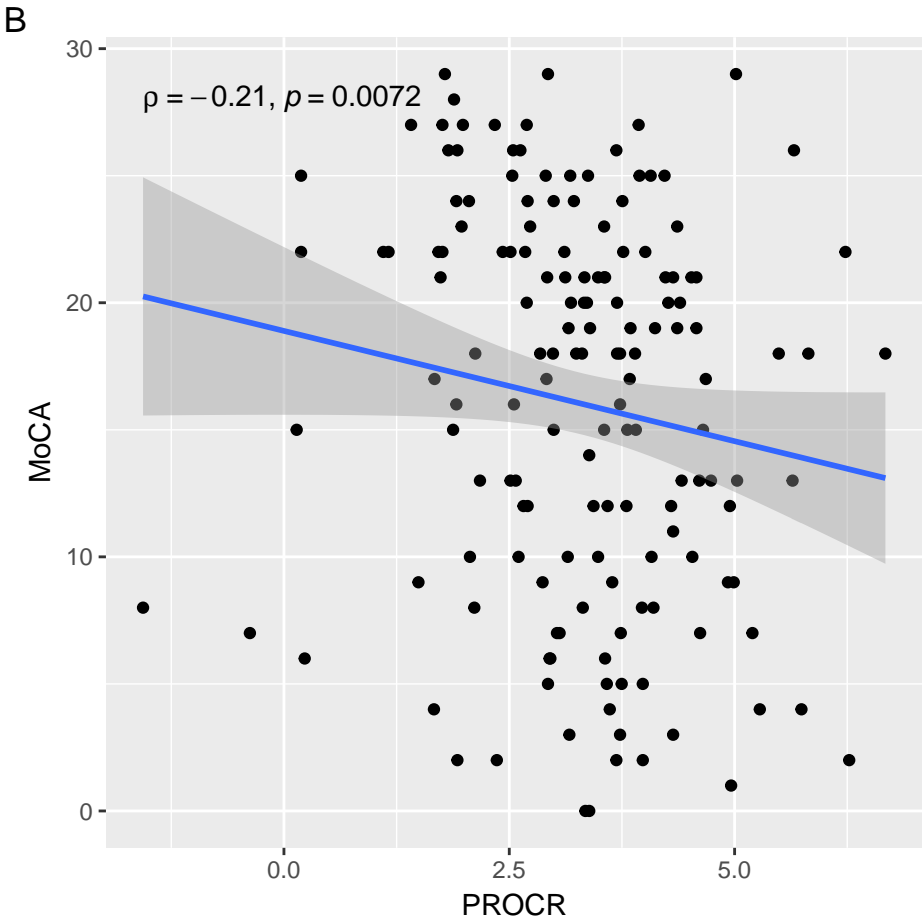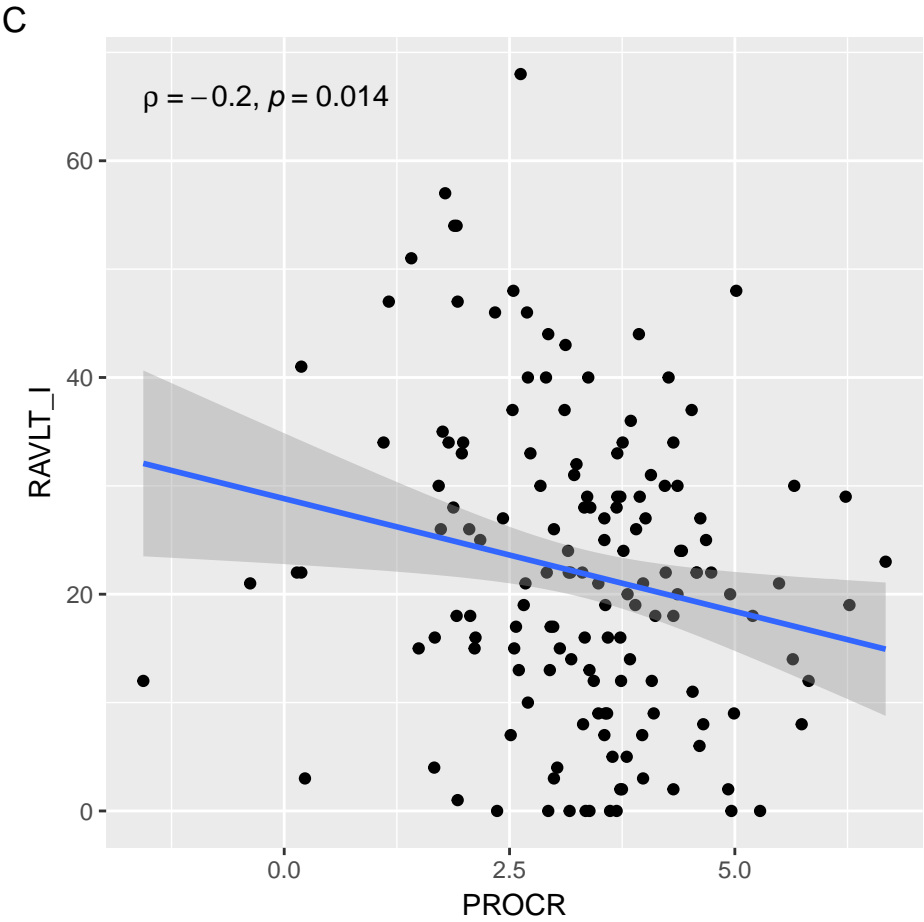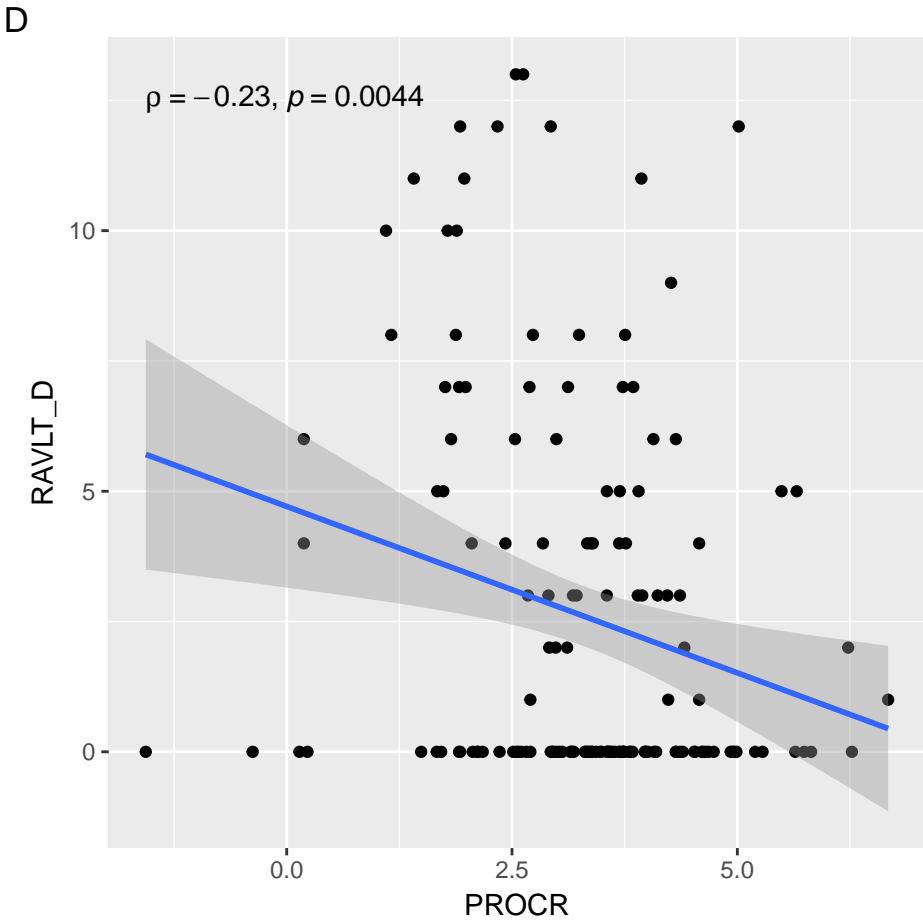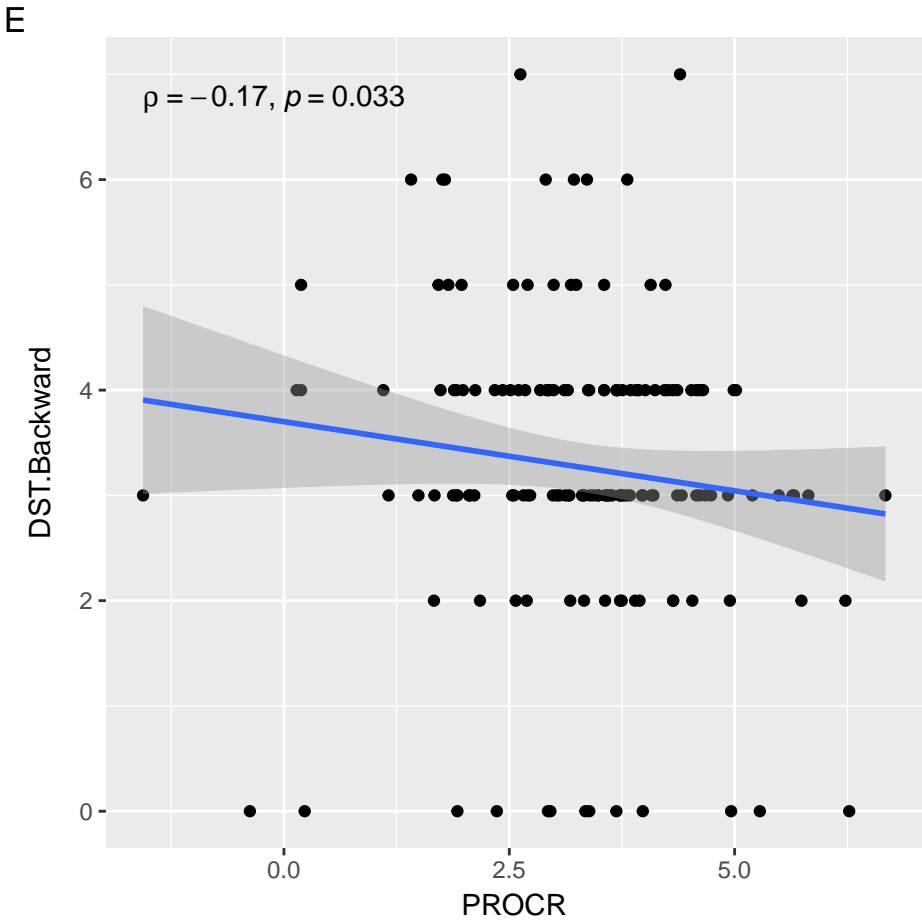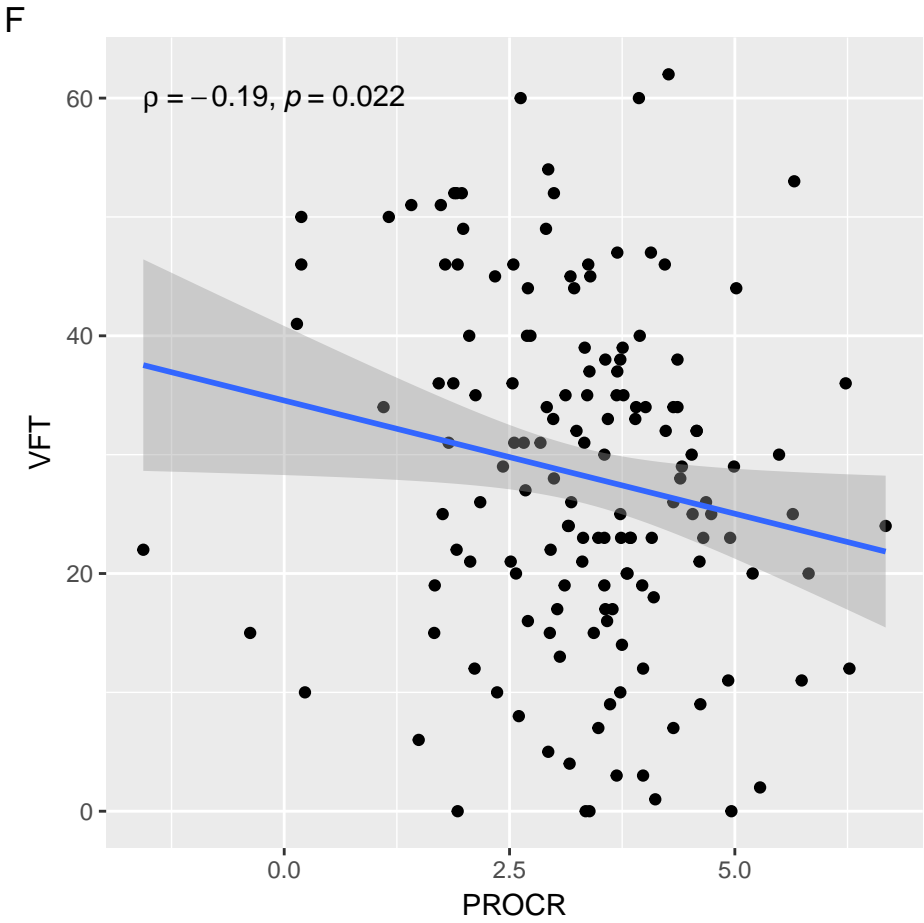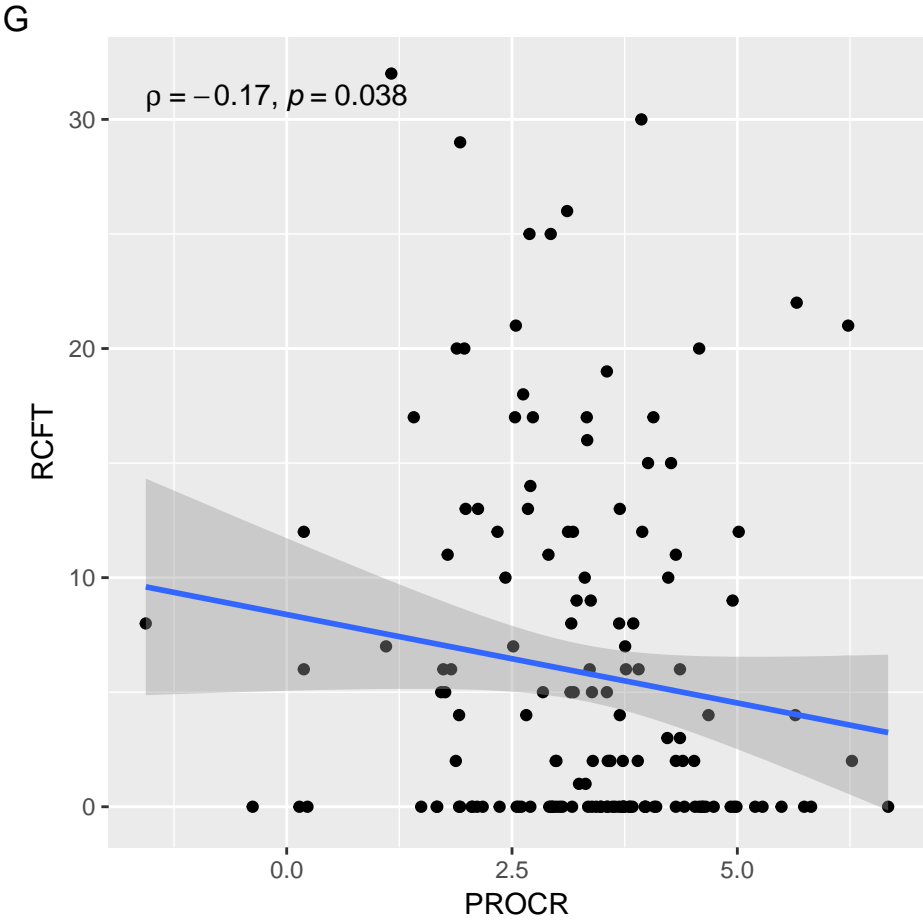

Supplement: MOESM5 [file 26264902]

A

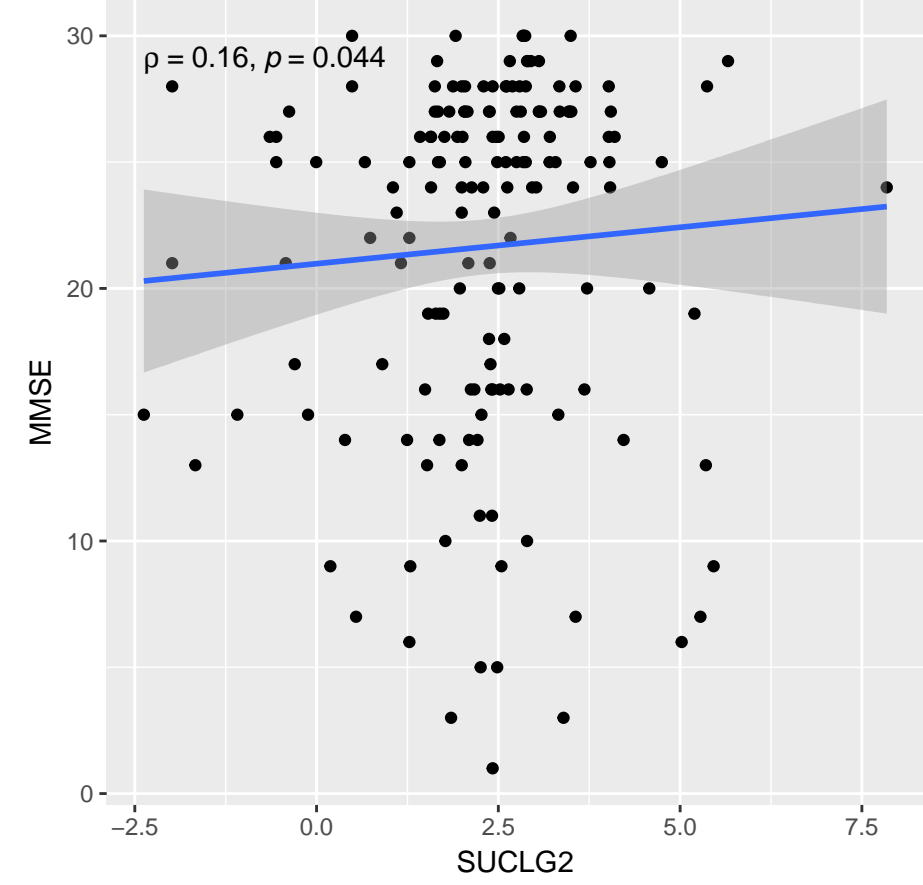

B

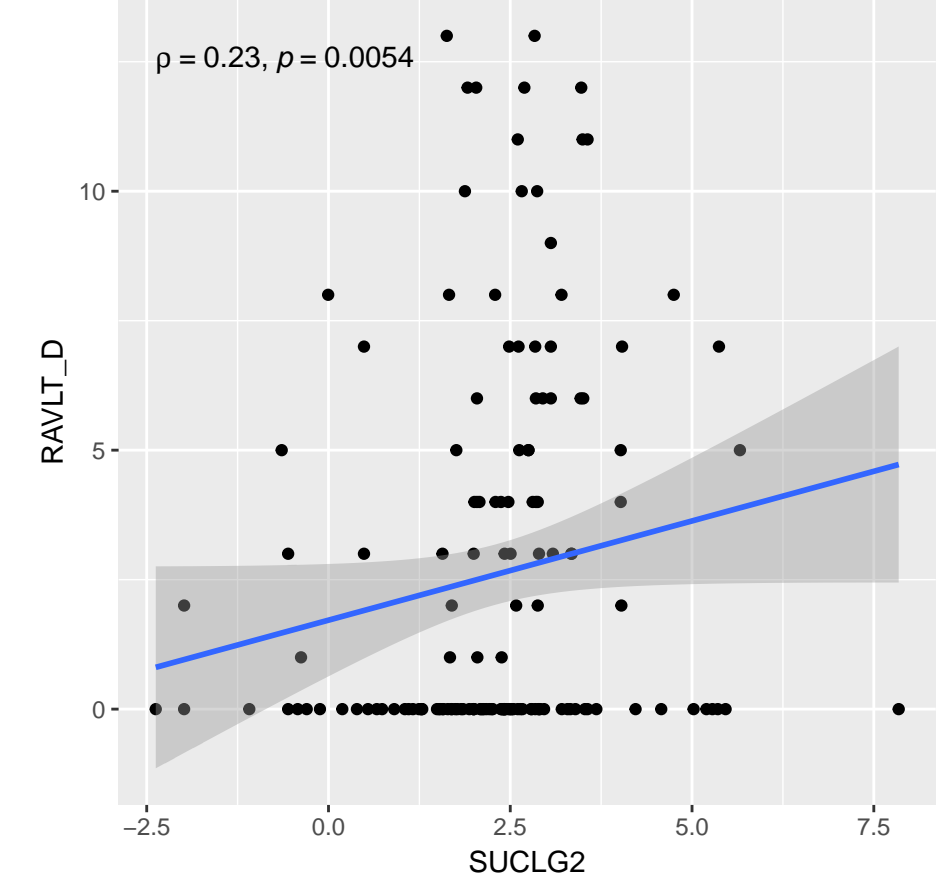

C

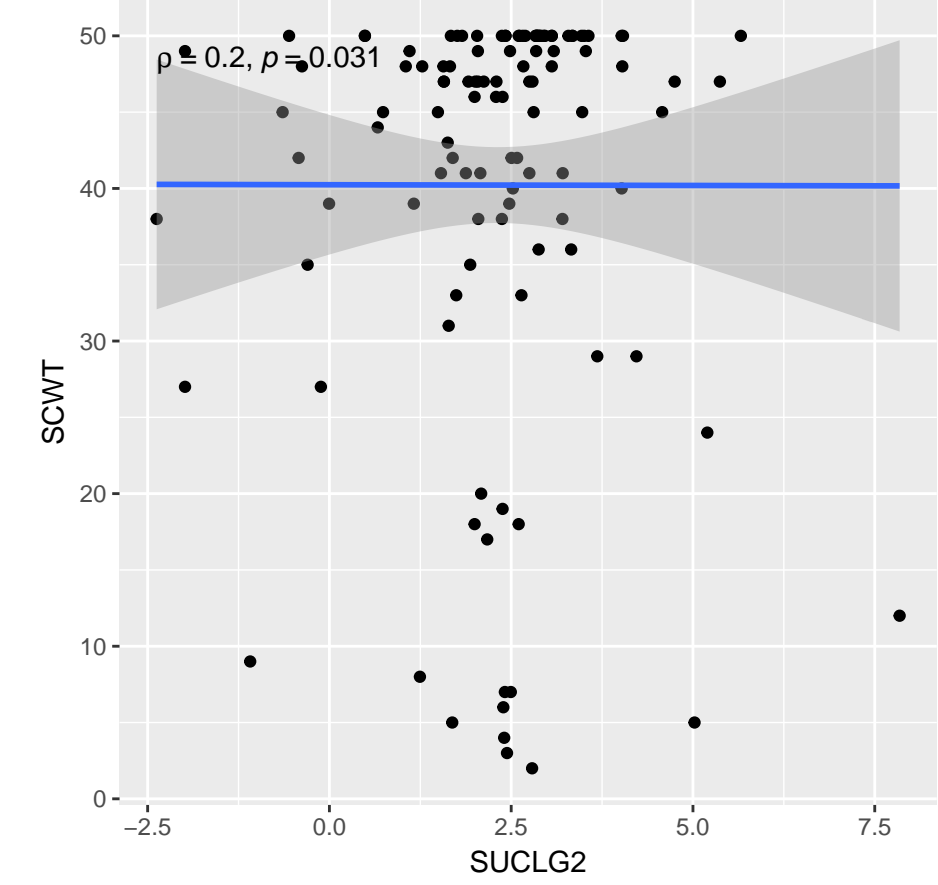

D

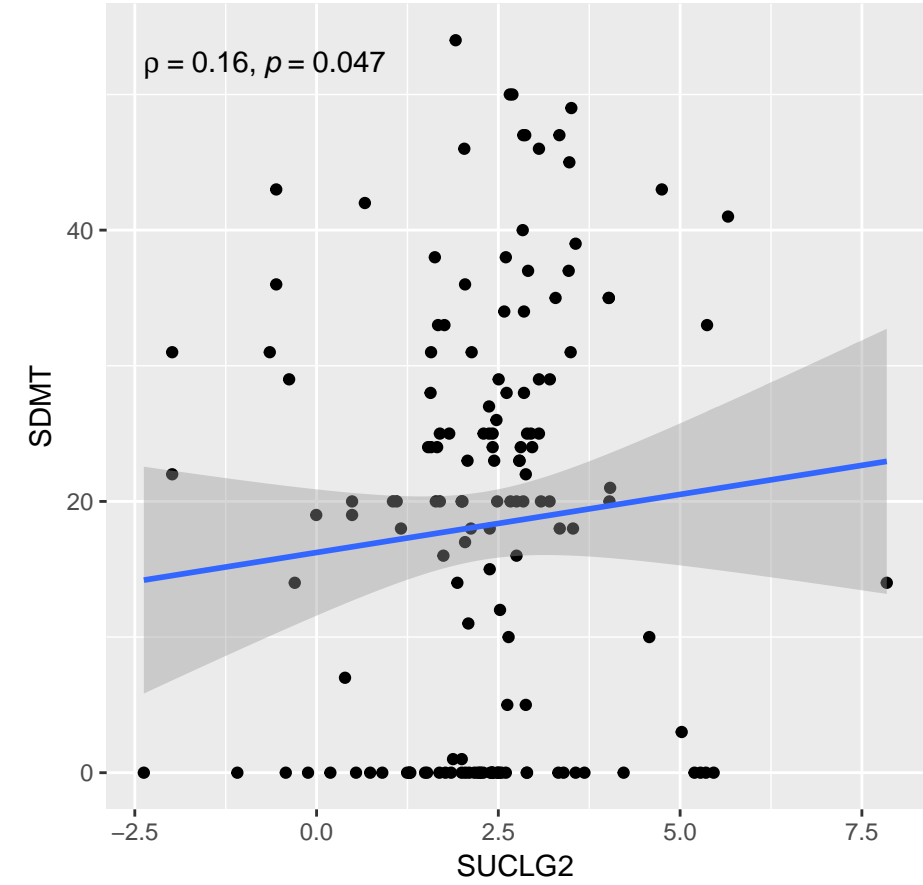

E

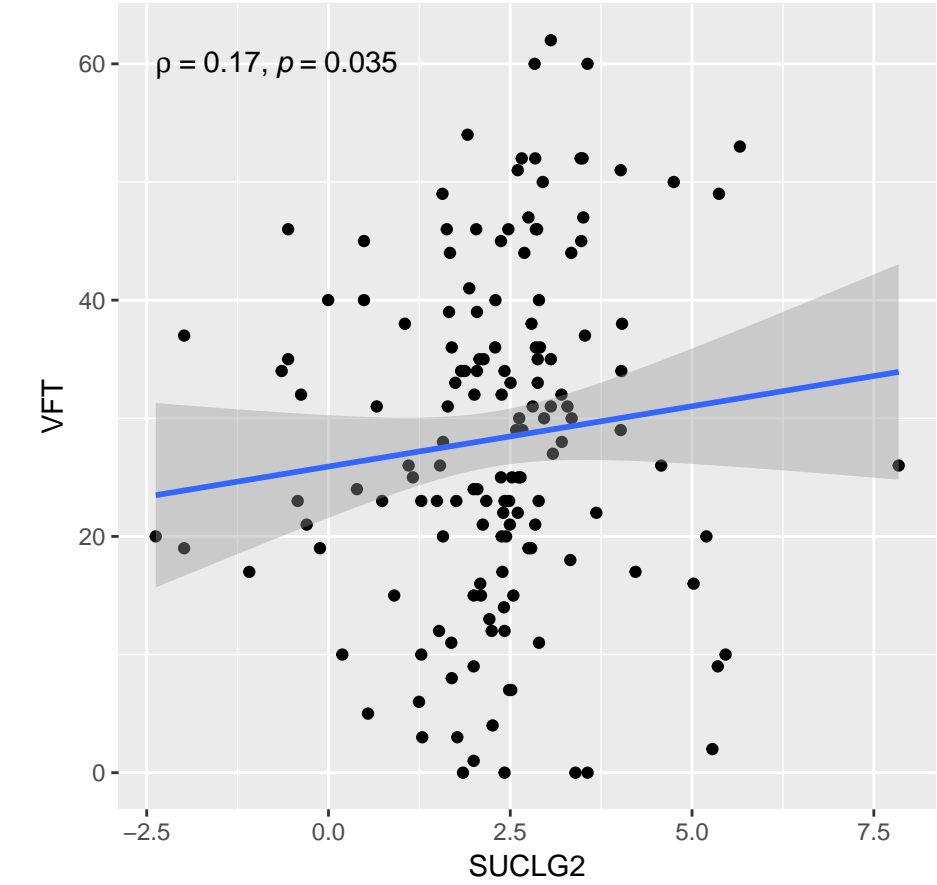

Supplement: MOESM5 [file 26264902]

**A**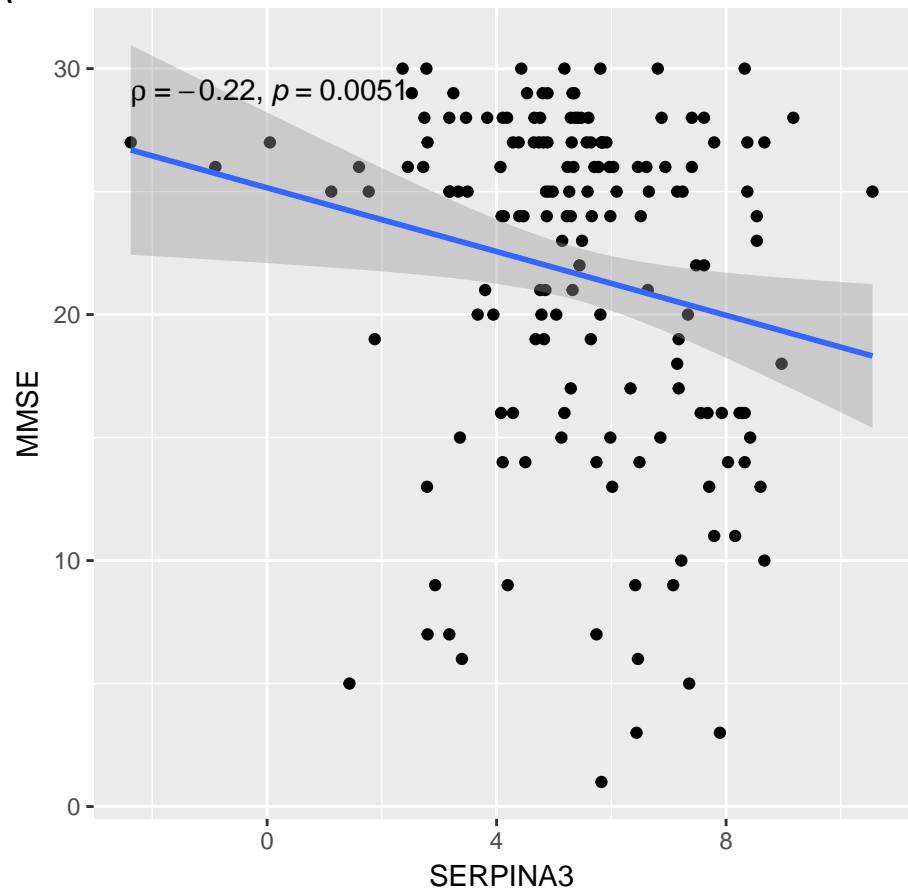**B**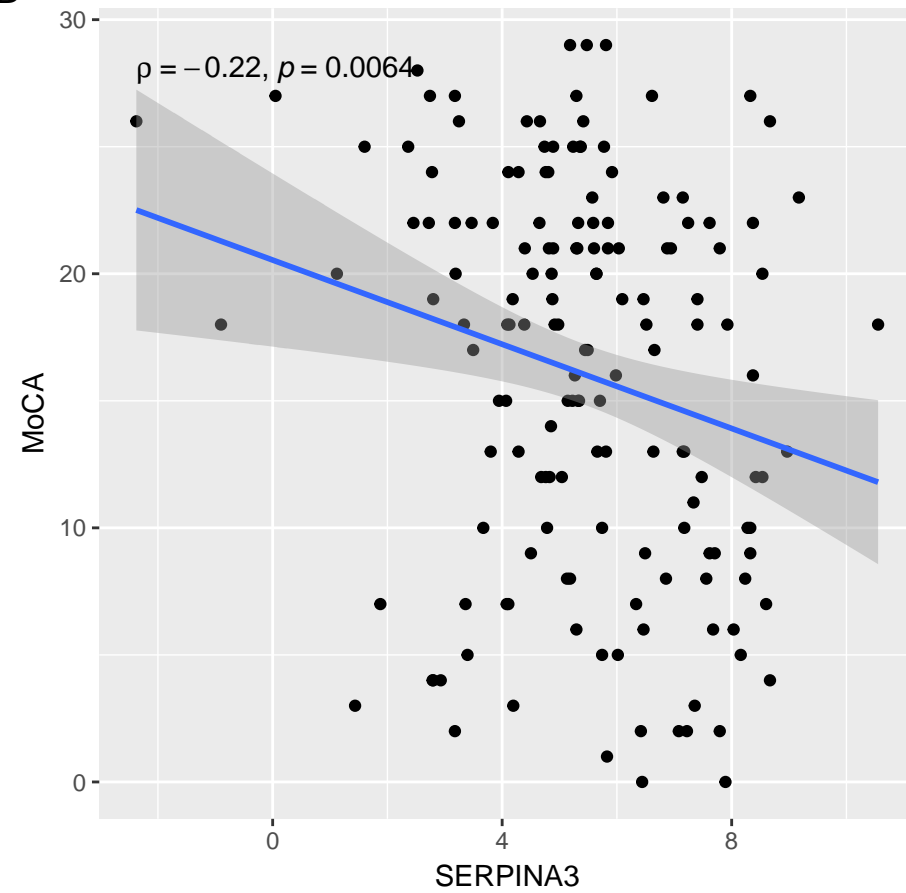**C**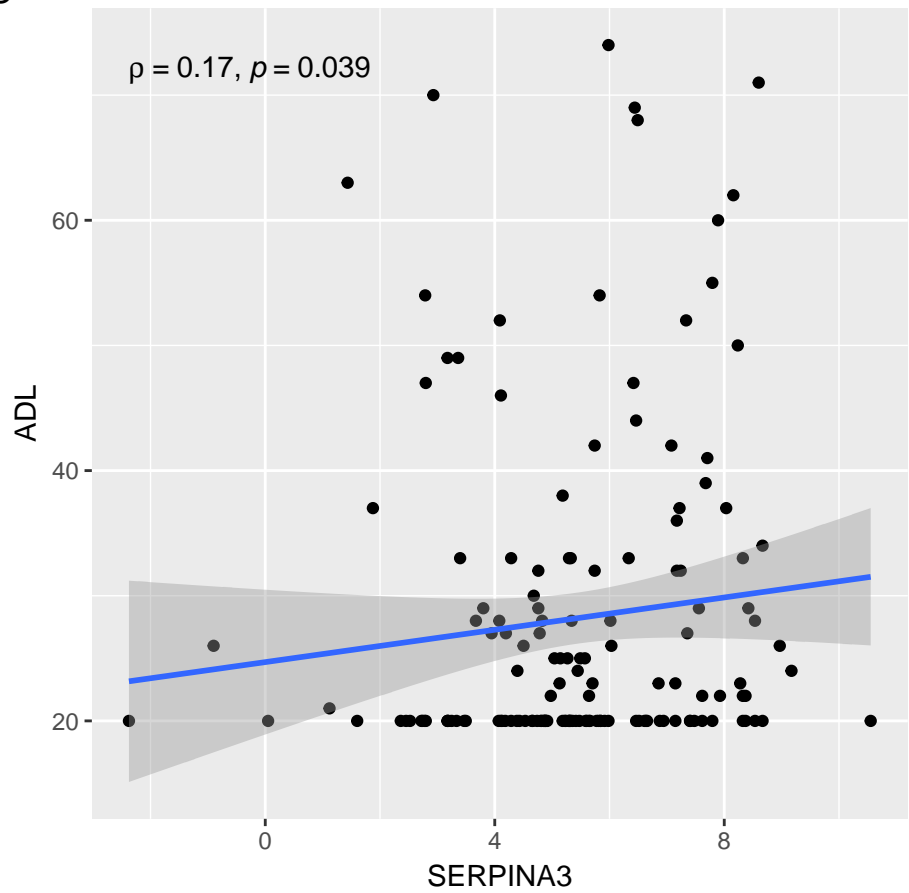**D**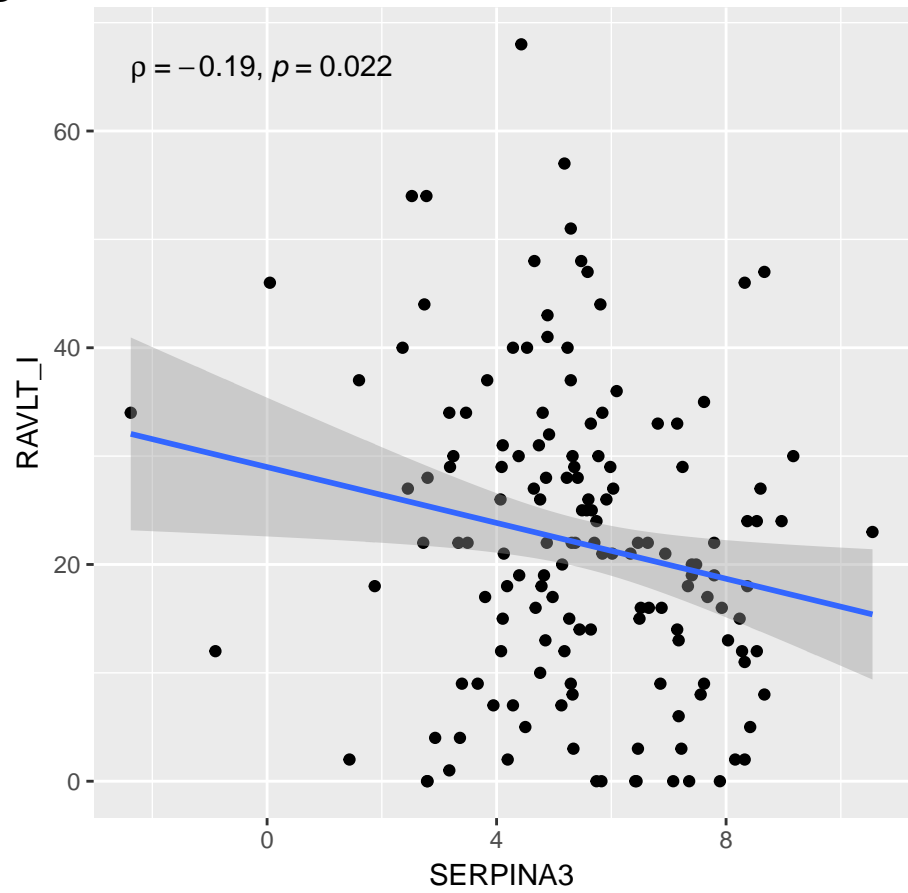**E**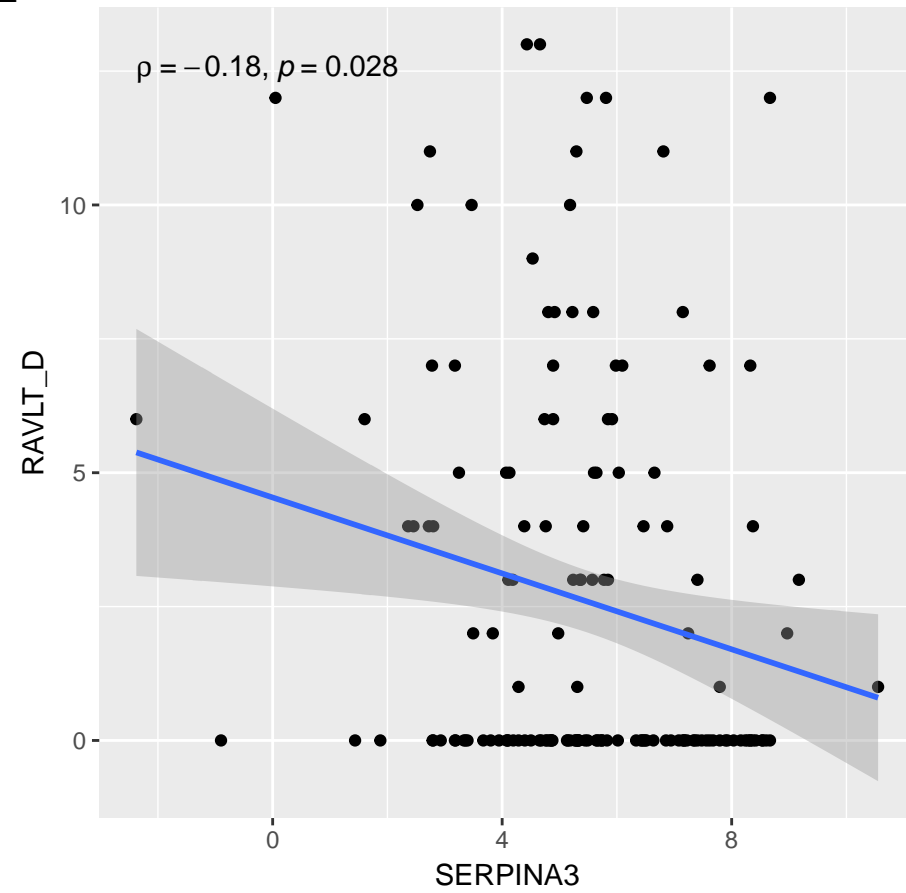**F**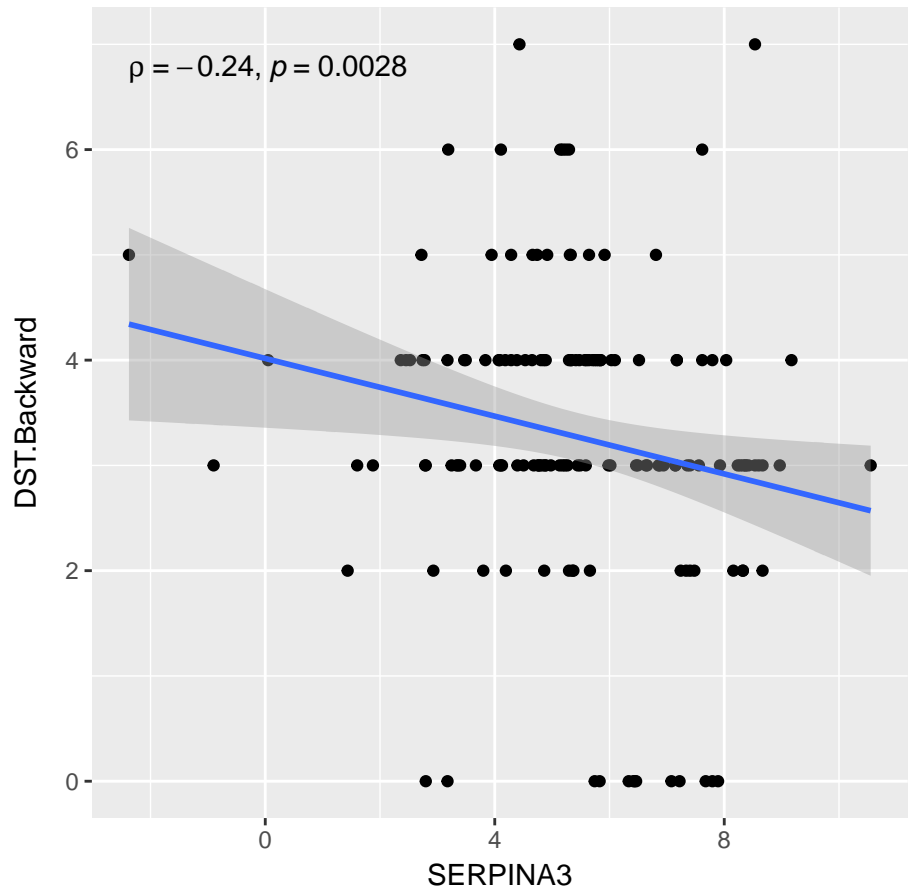**G**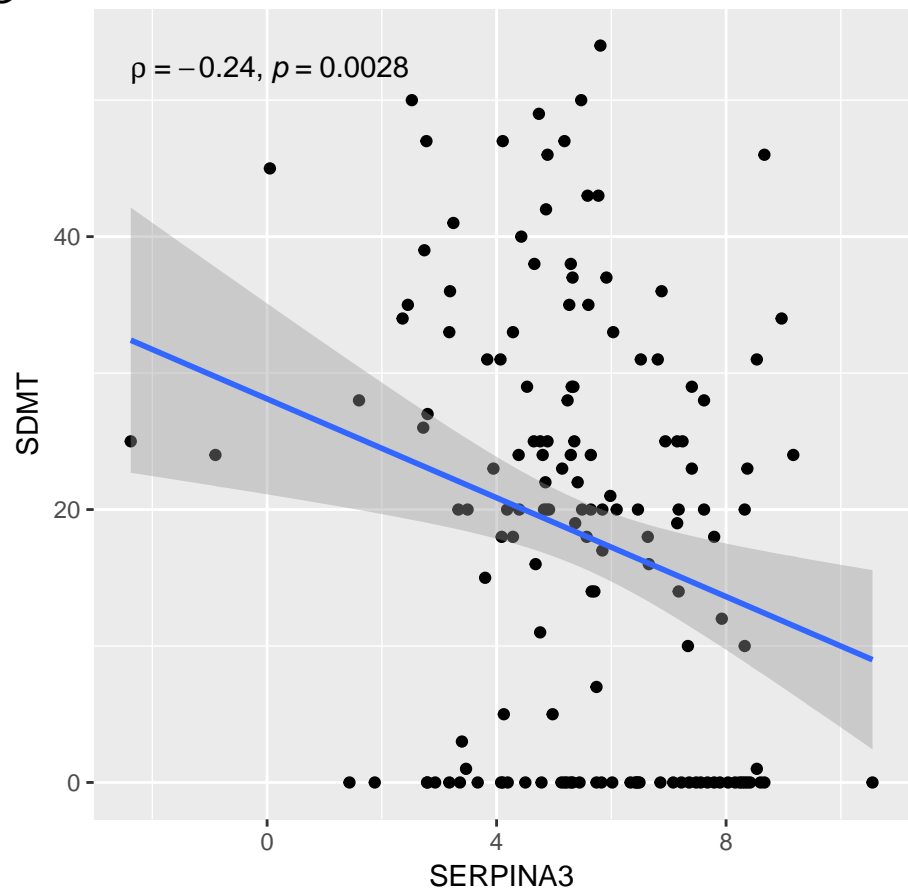**H**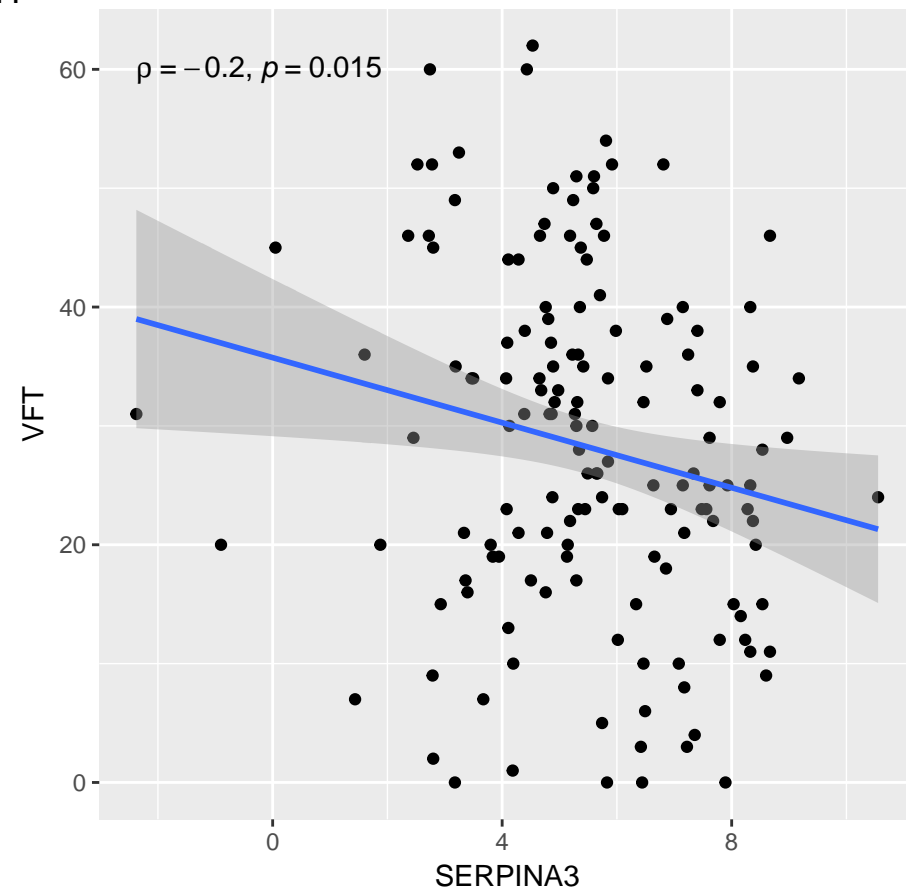**I**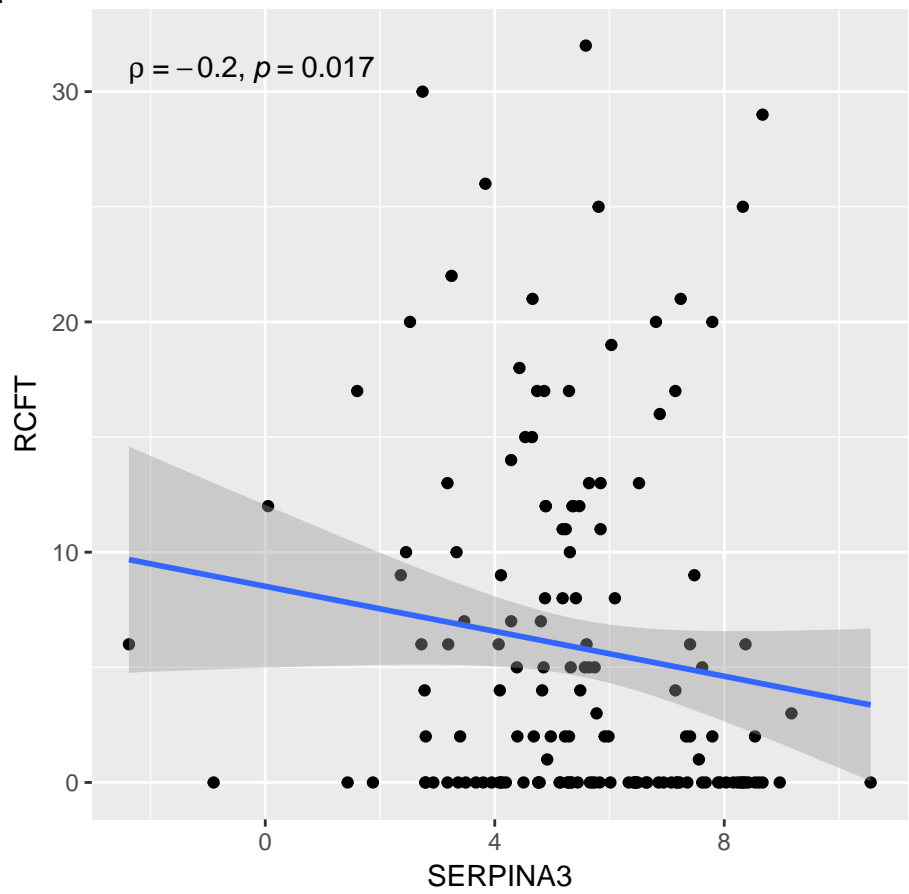

Supplement: MOESM5 [file 26264902]

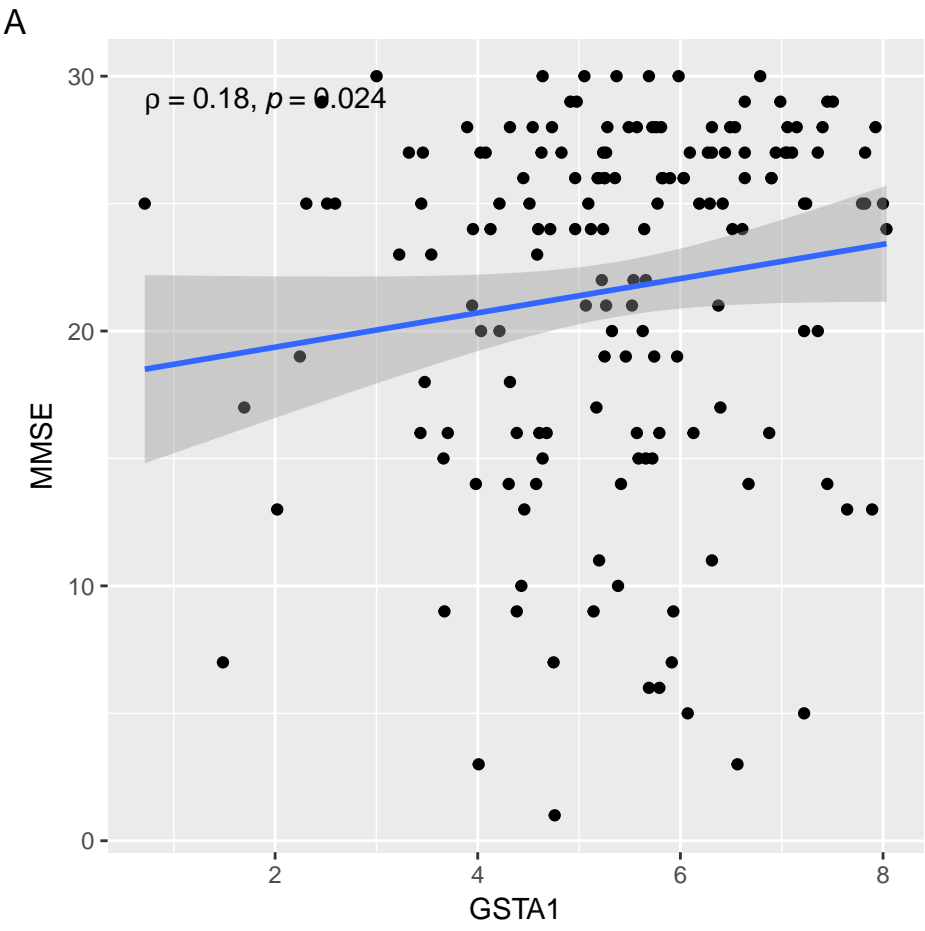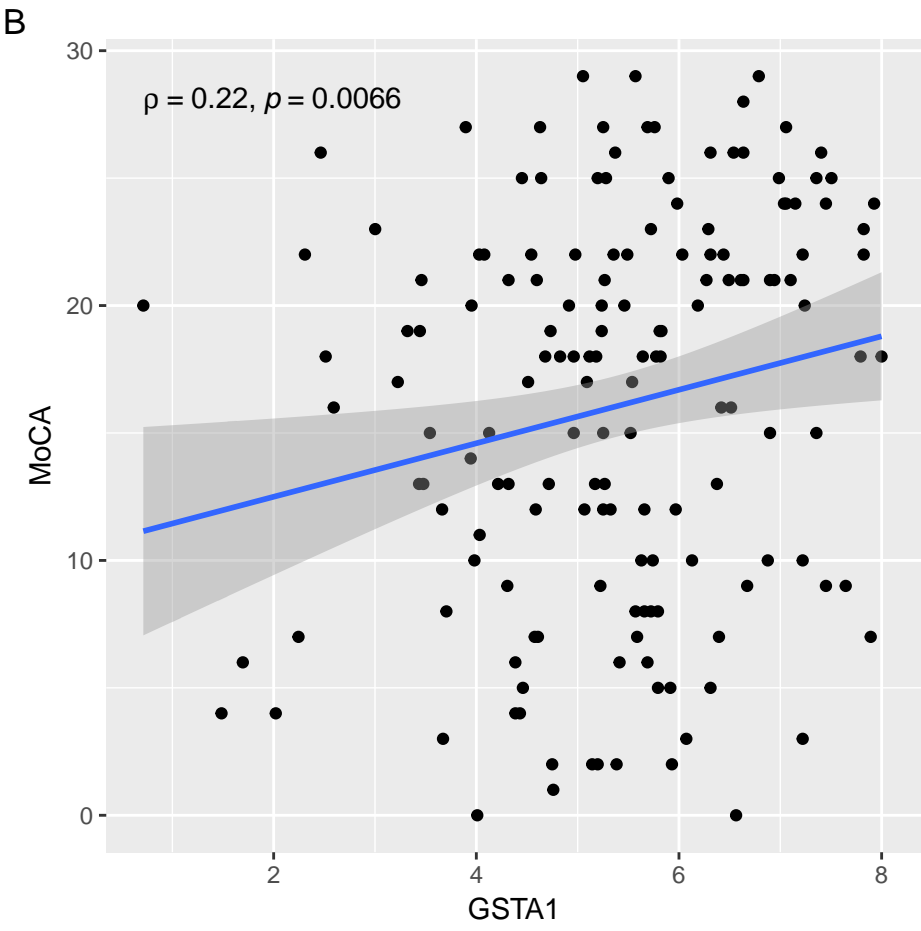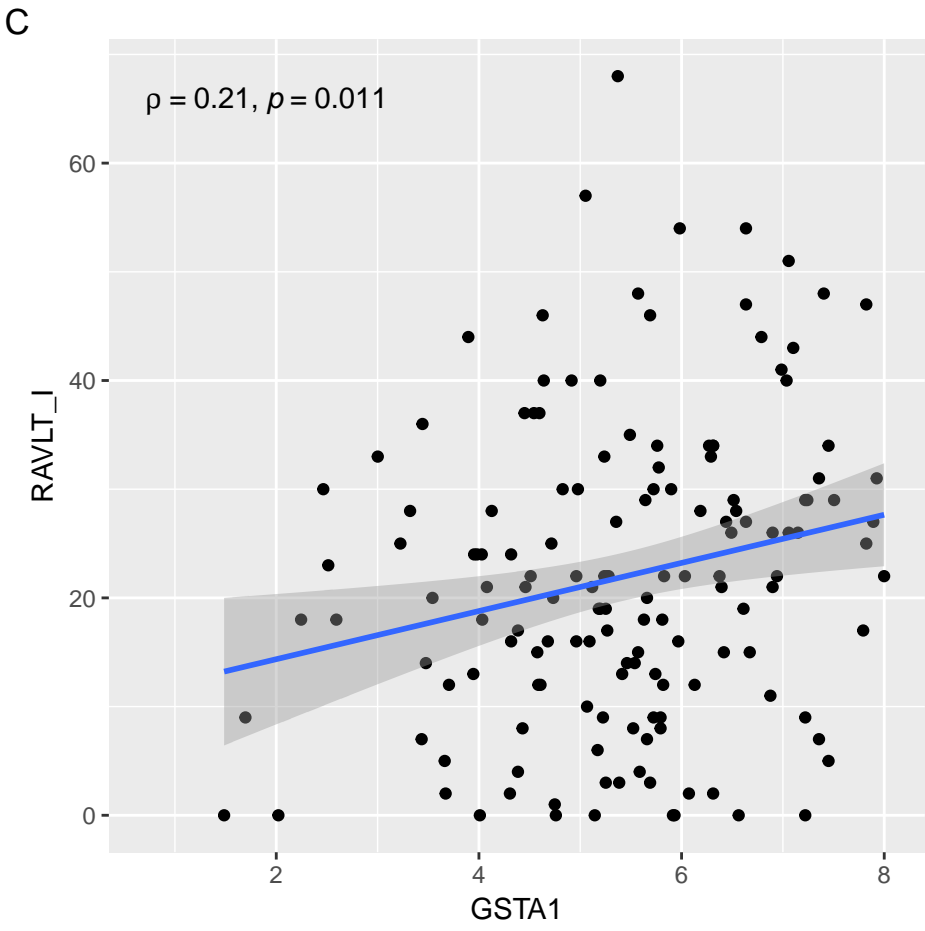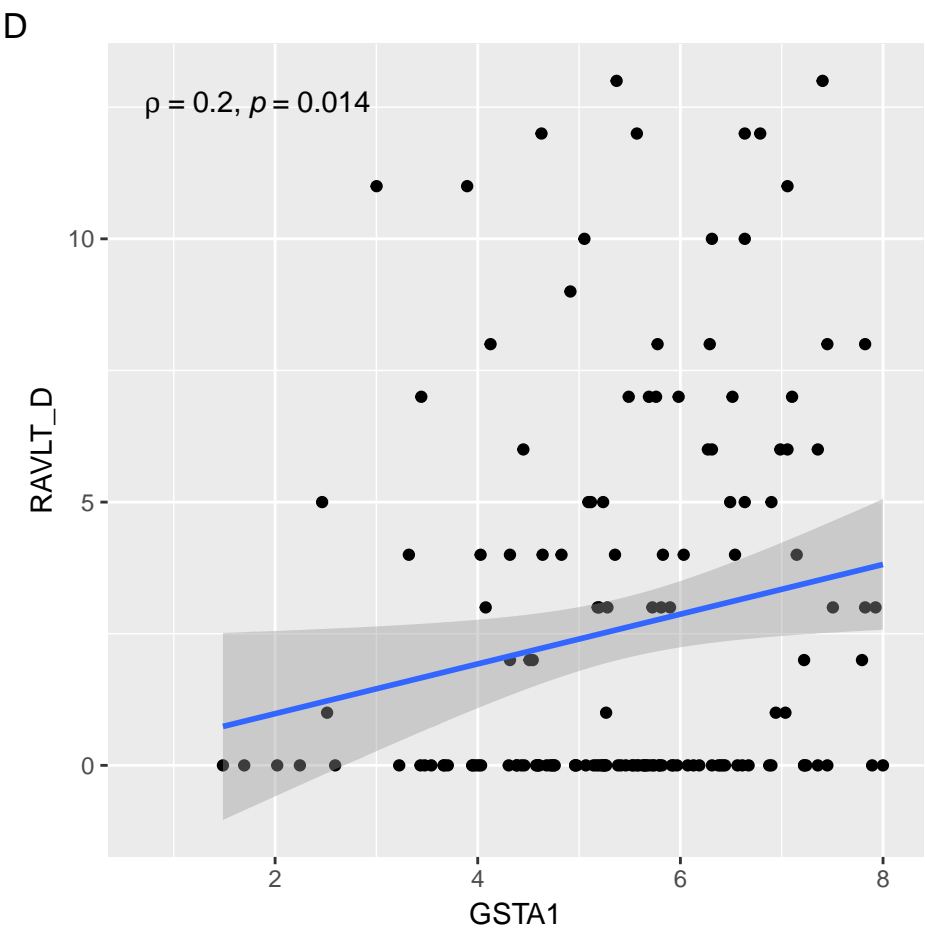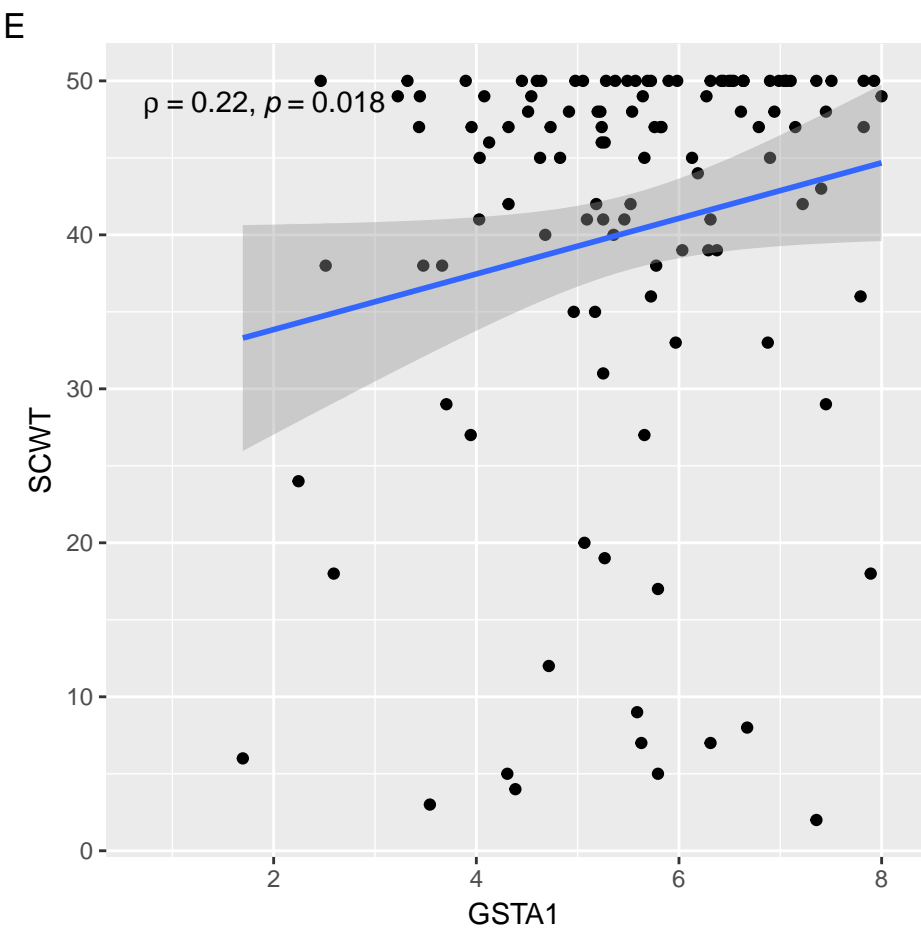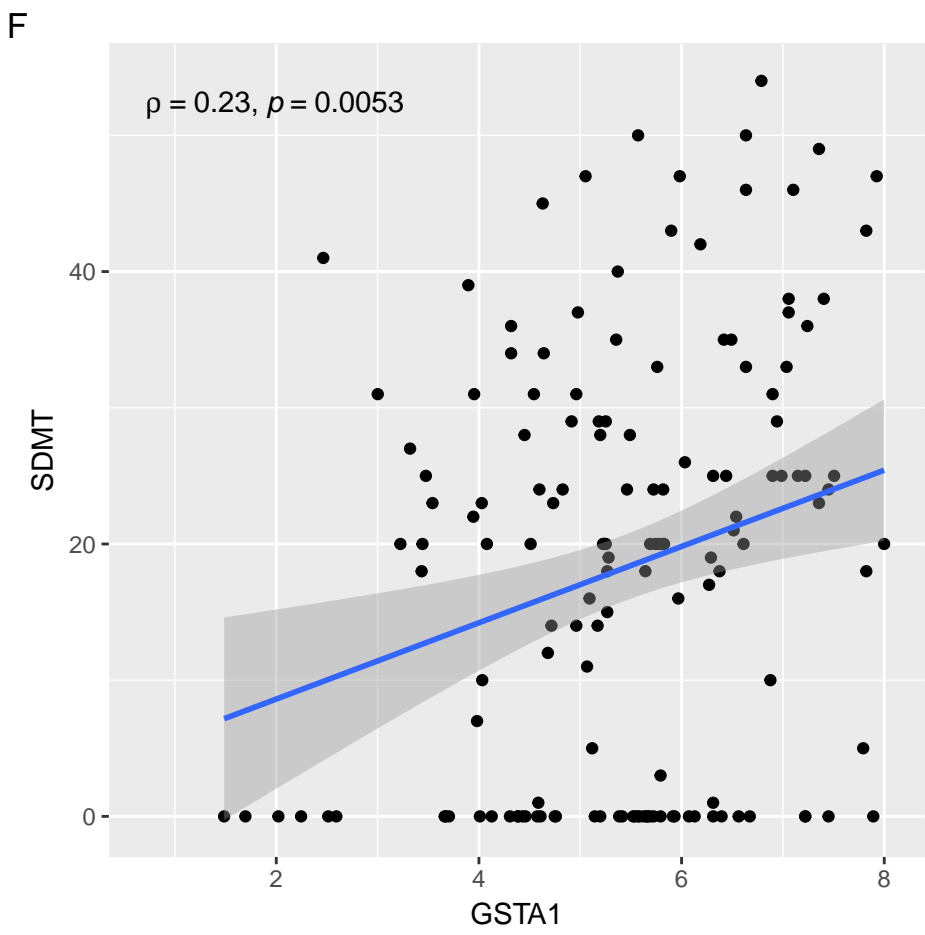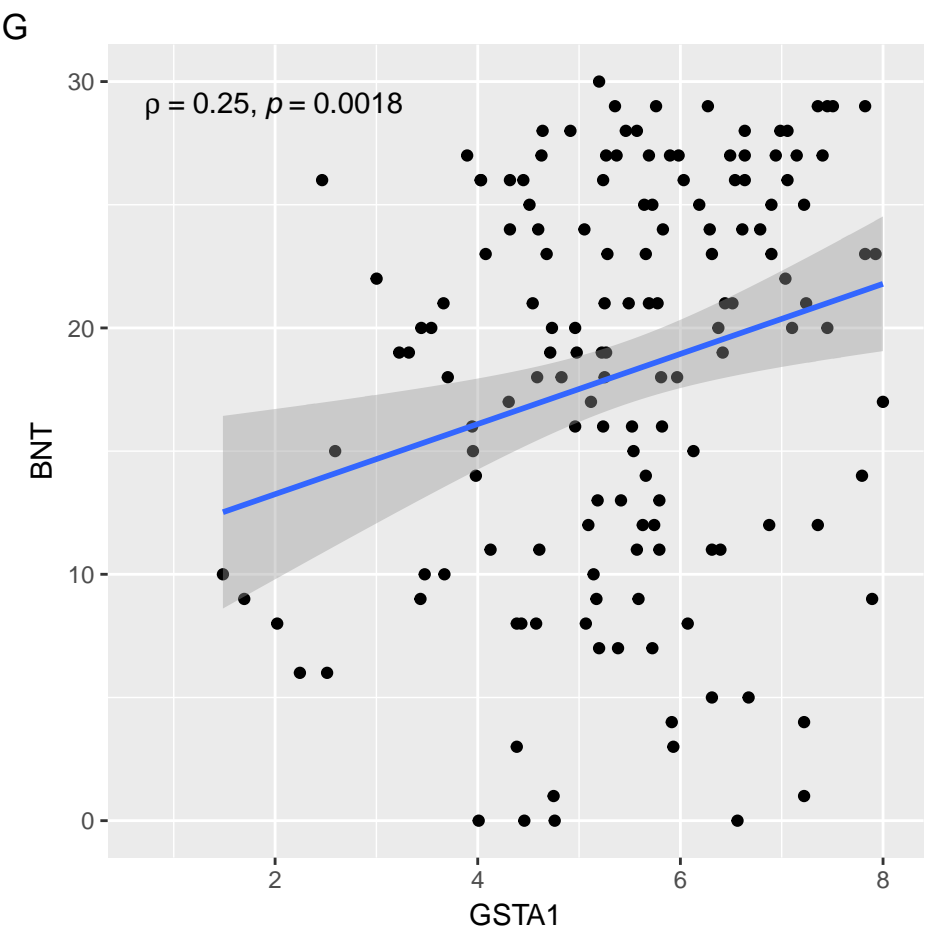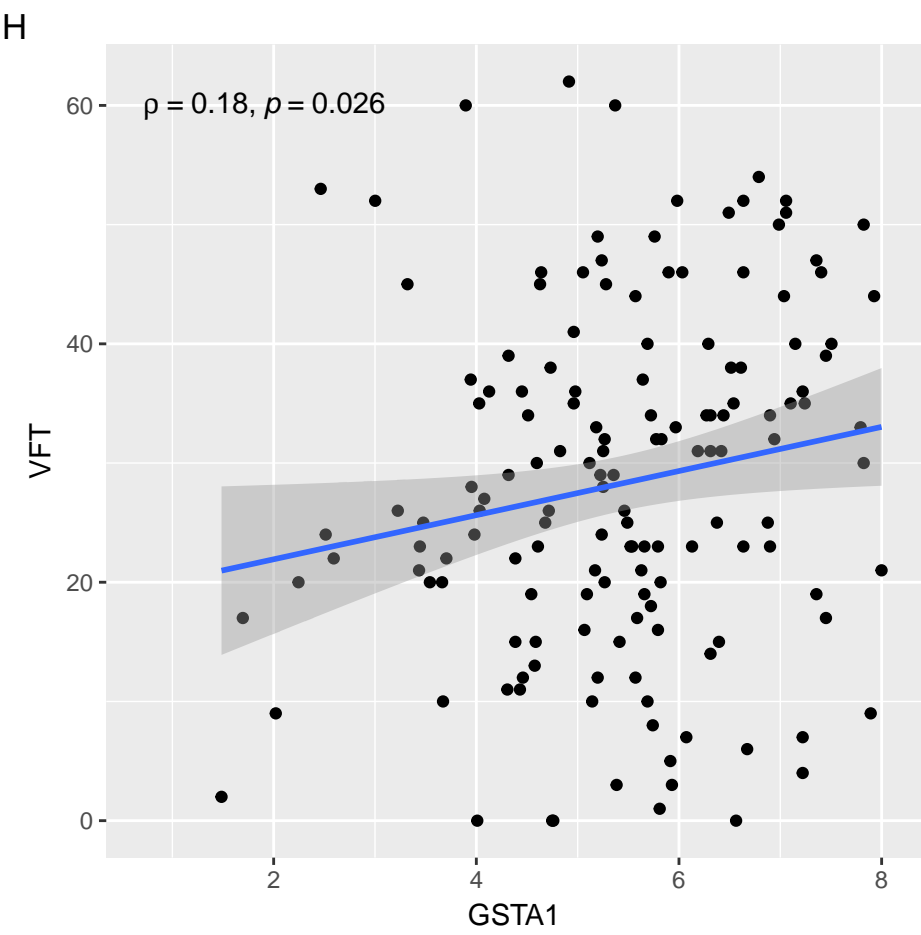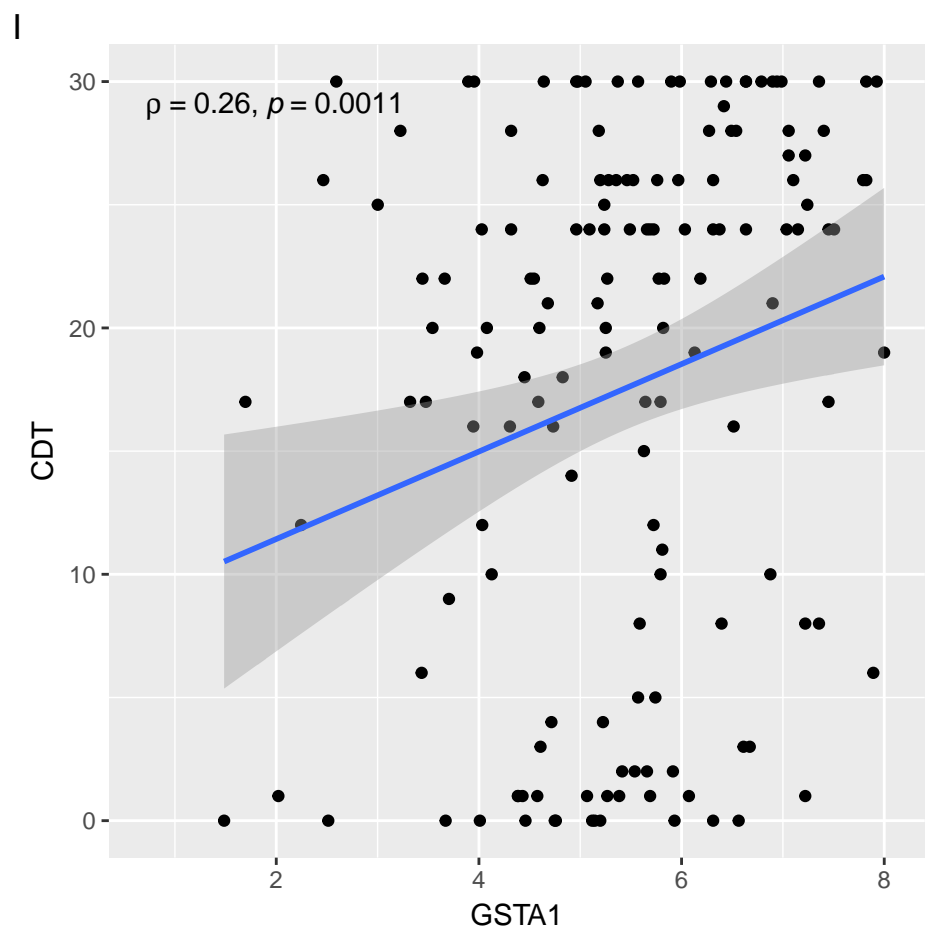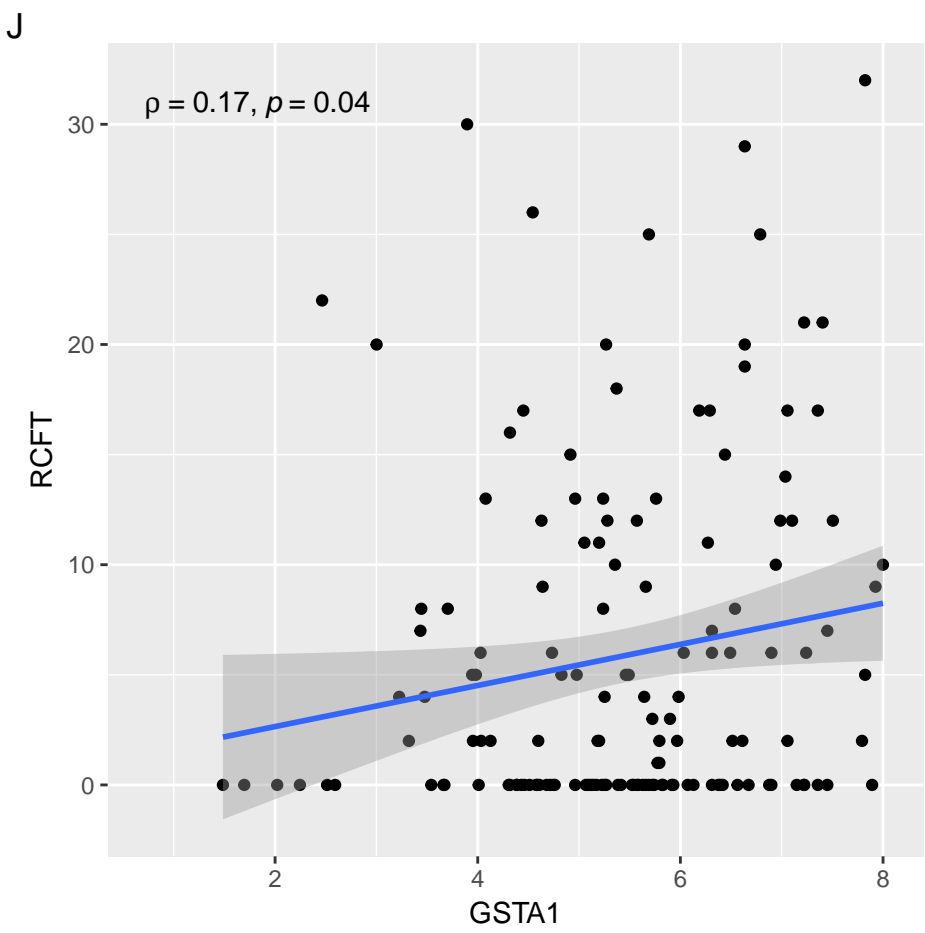

Supplement: MOESM5 [file 26264902]

A

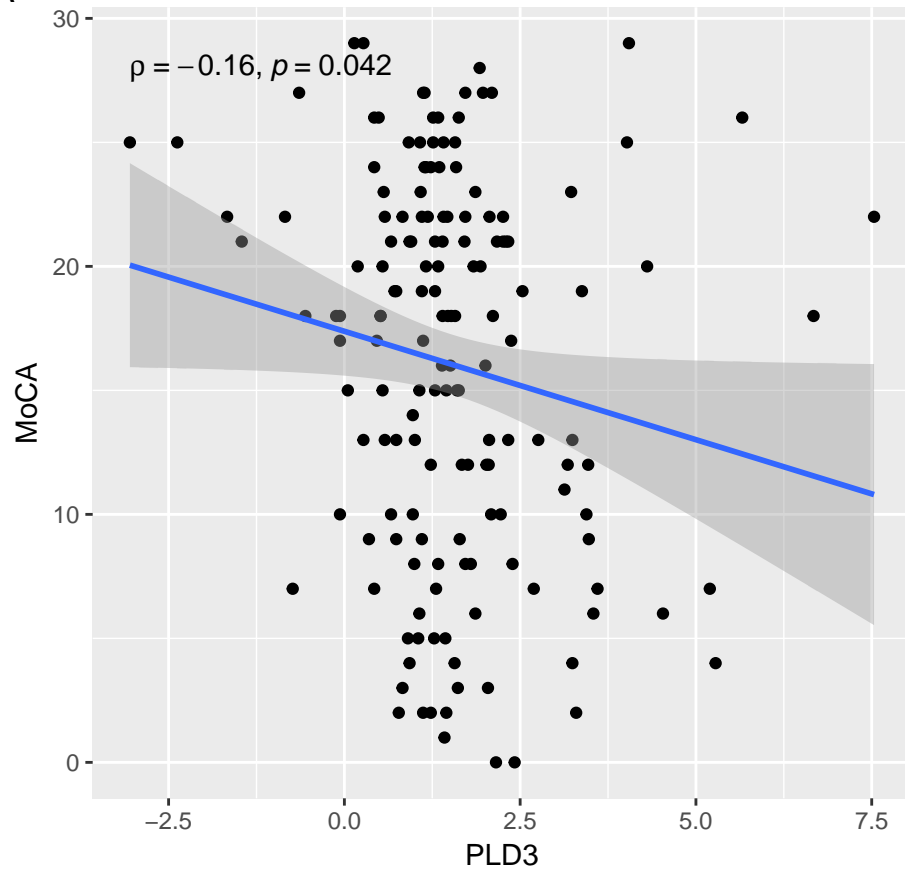

B

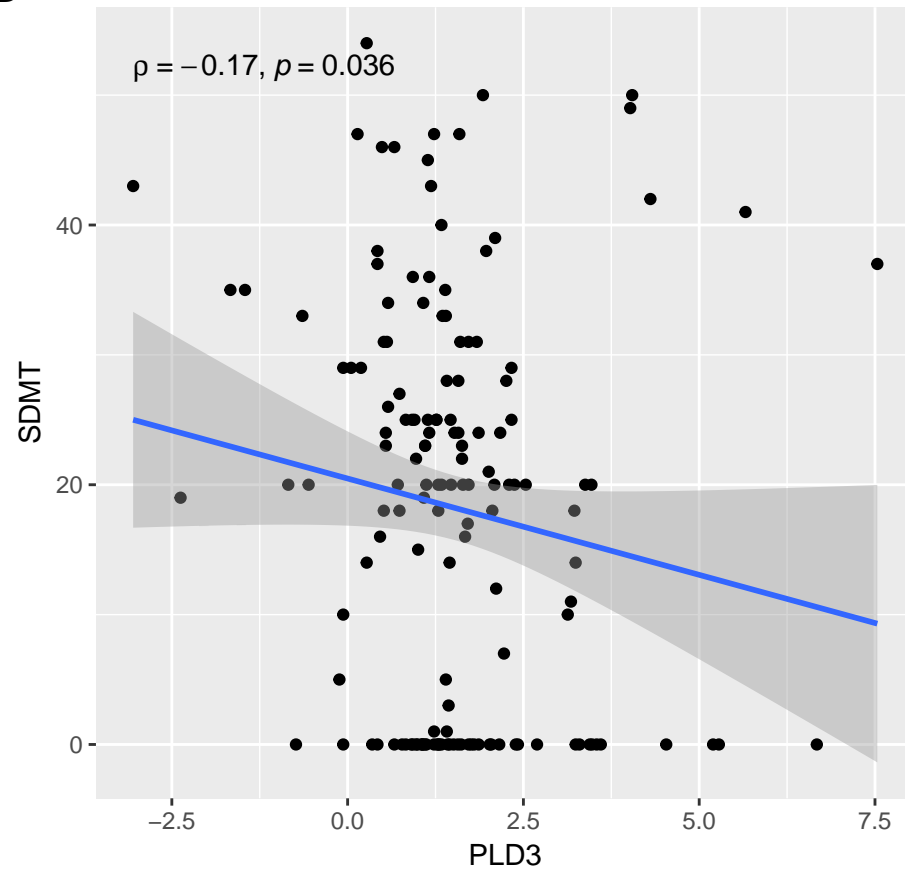

C

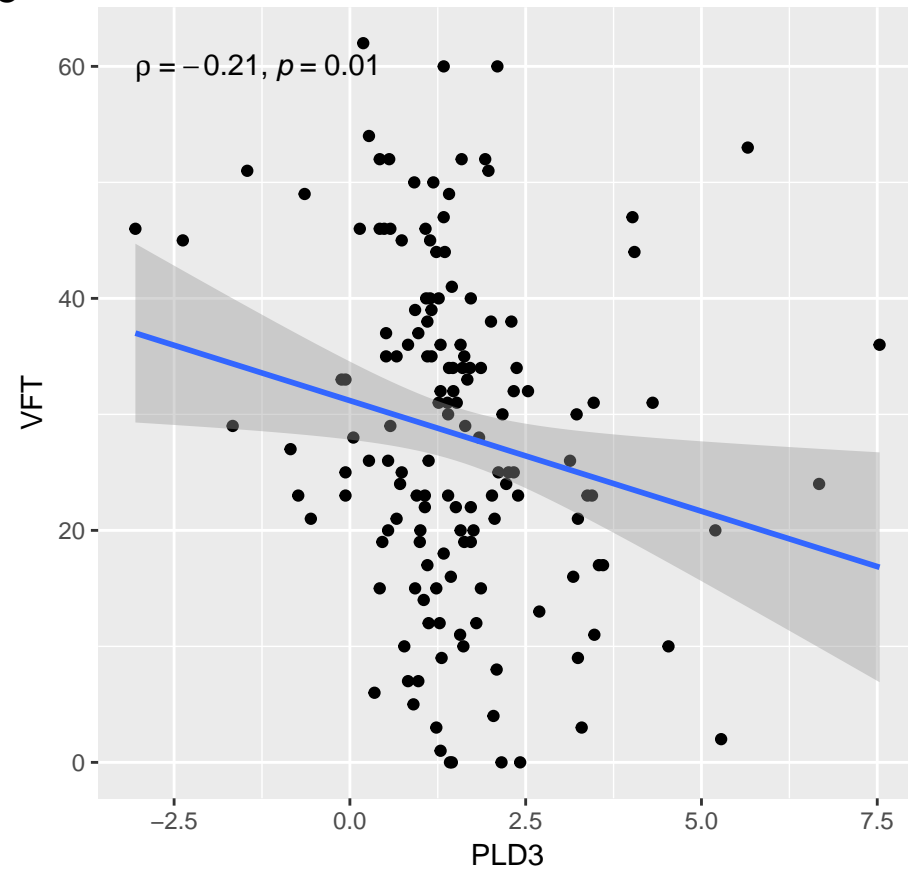

Supplement: MOESM5 [file 26264902]

A

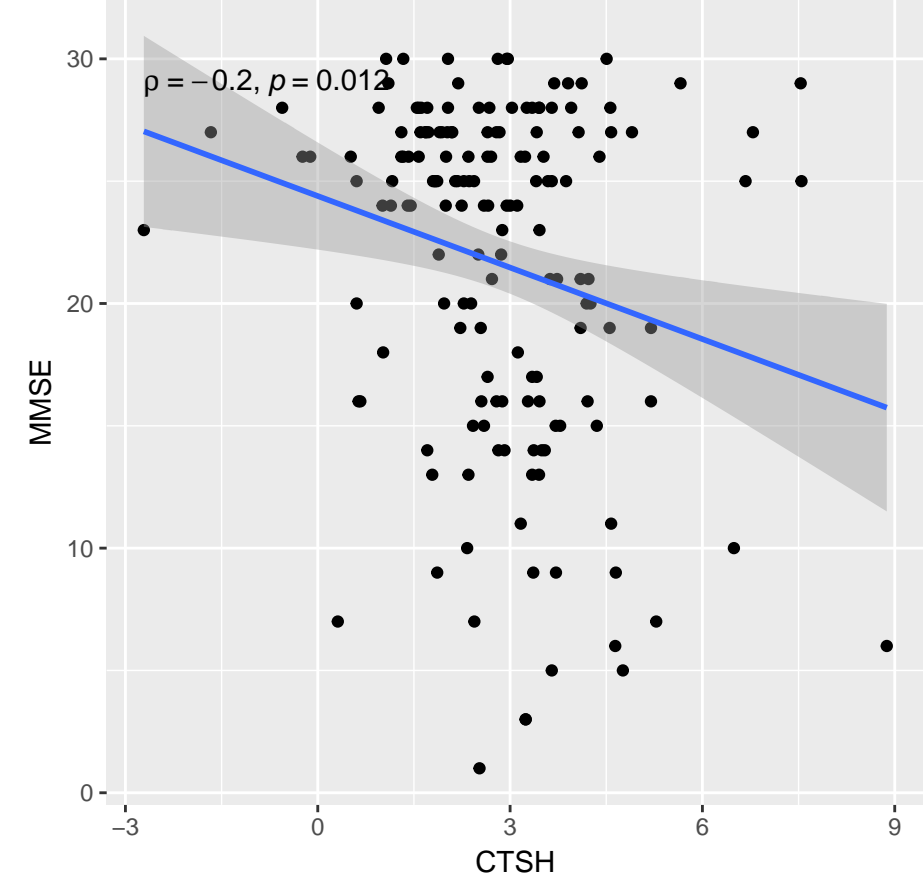

B

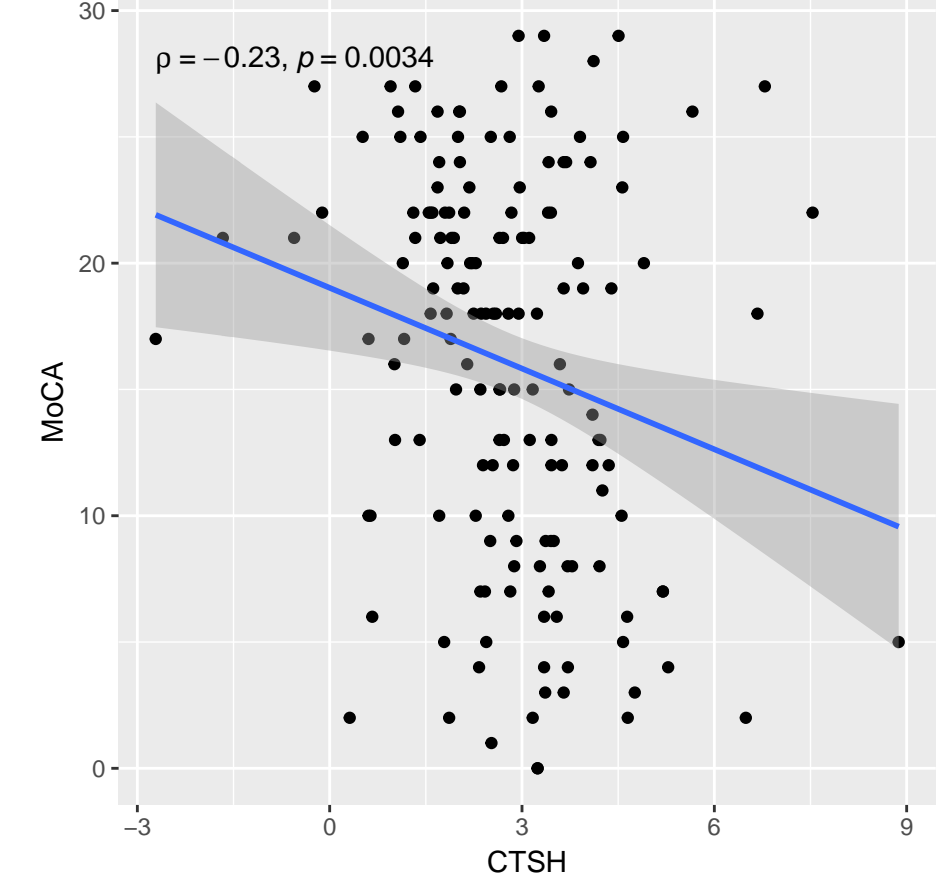

C

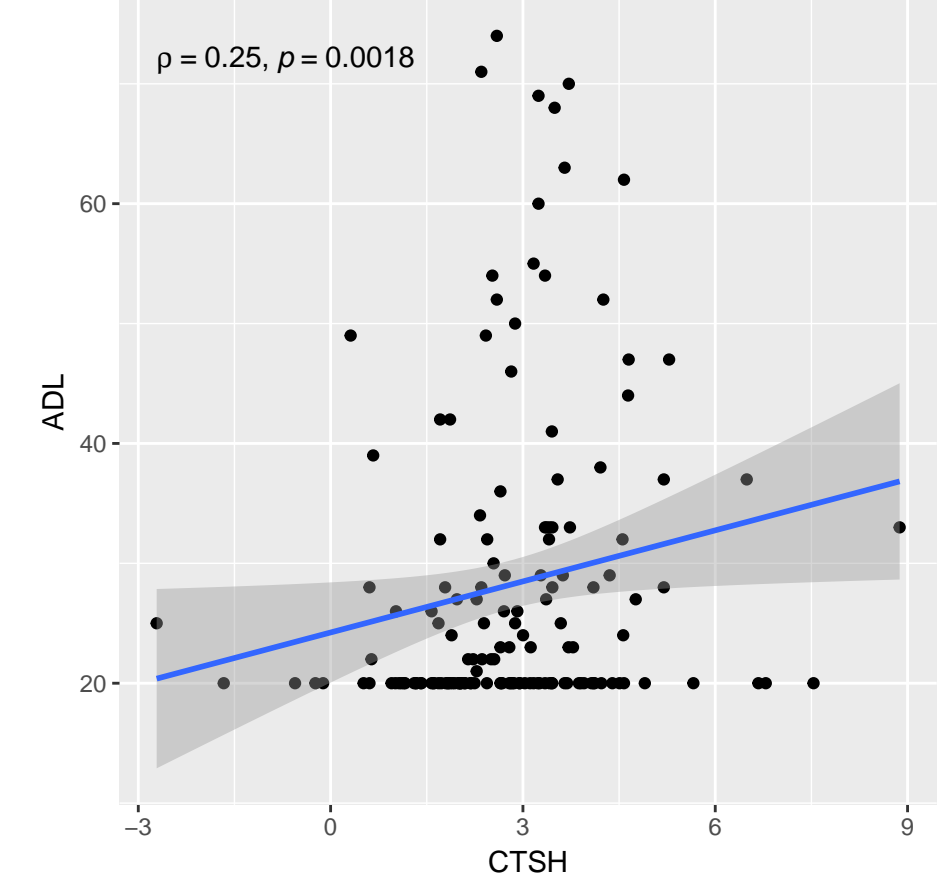

D

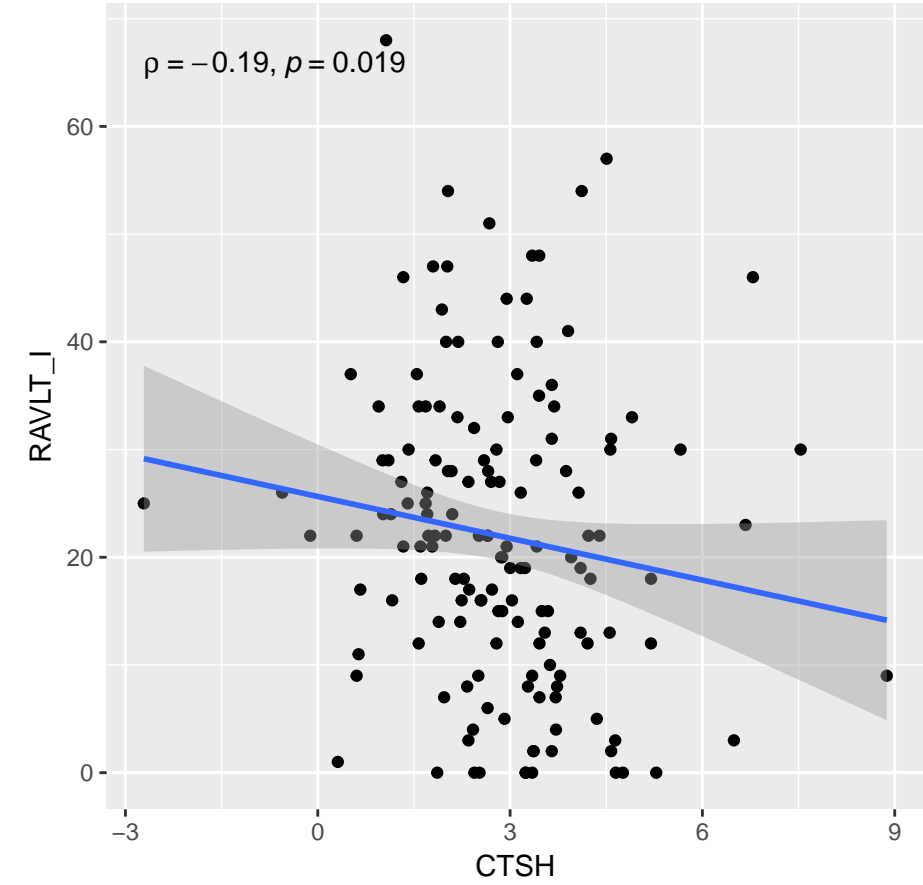

E

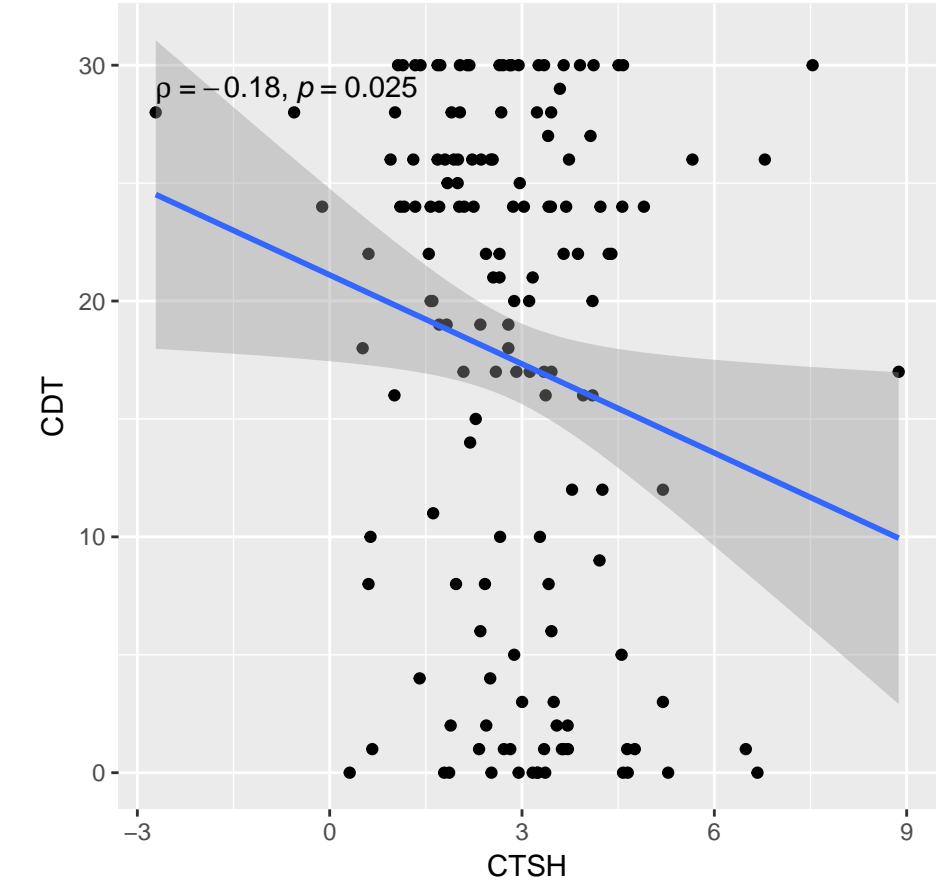

Supplement: MOESM5 [file 26264902]

A

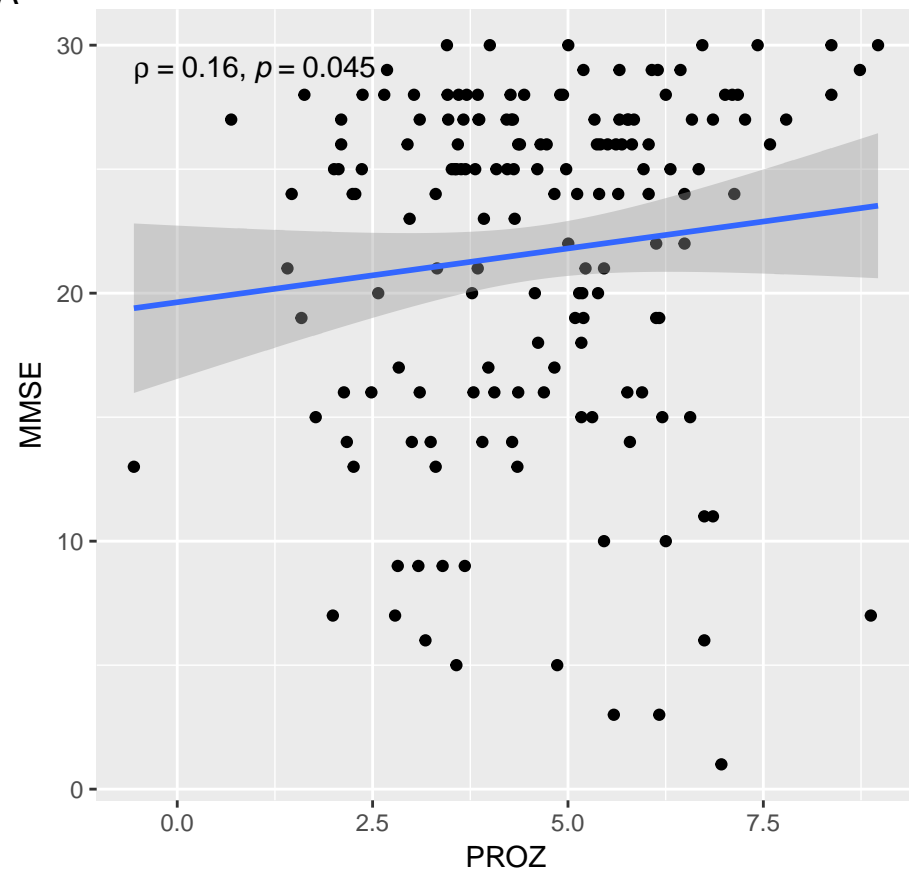

B

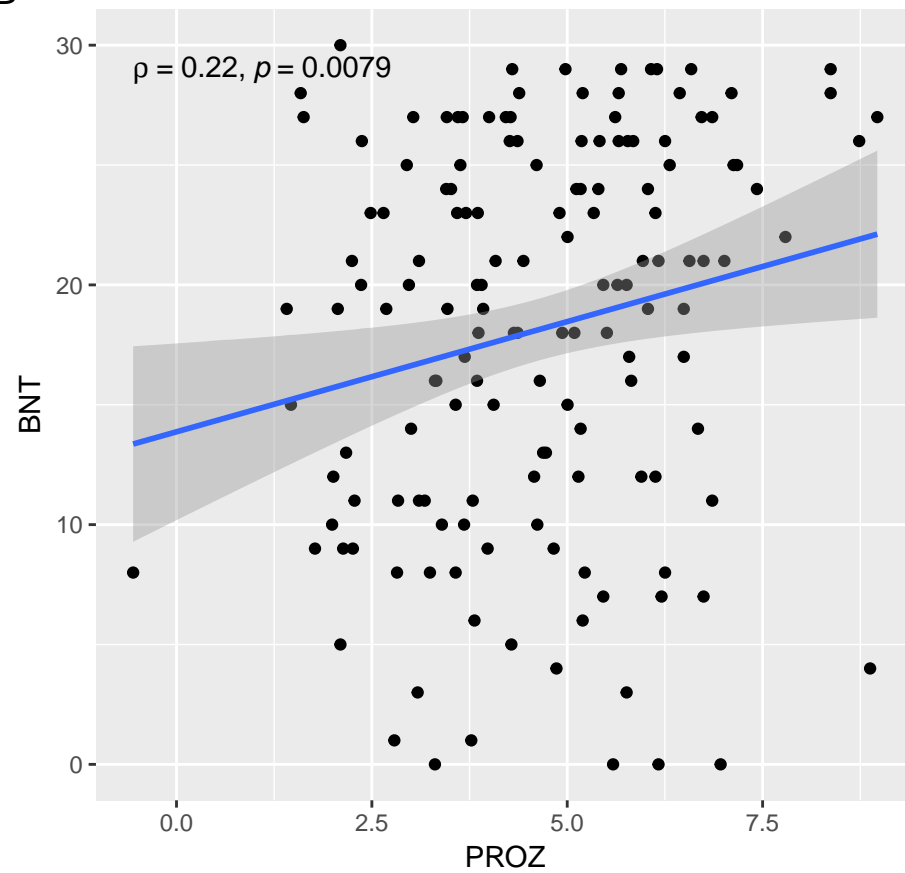

C

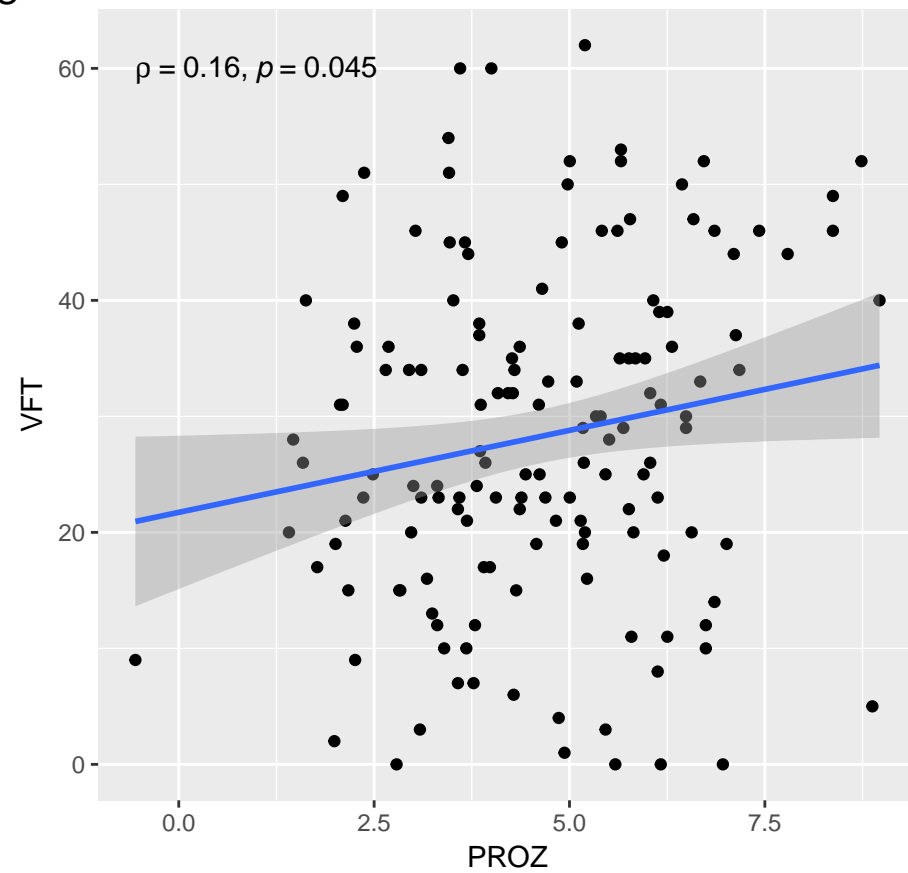

Supplement: MOESM5 [file 26264902]

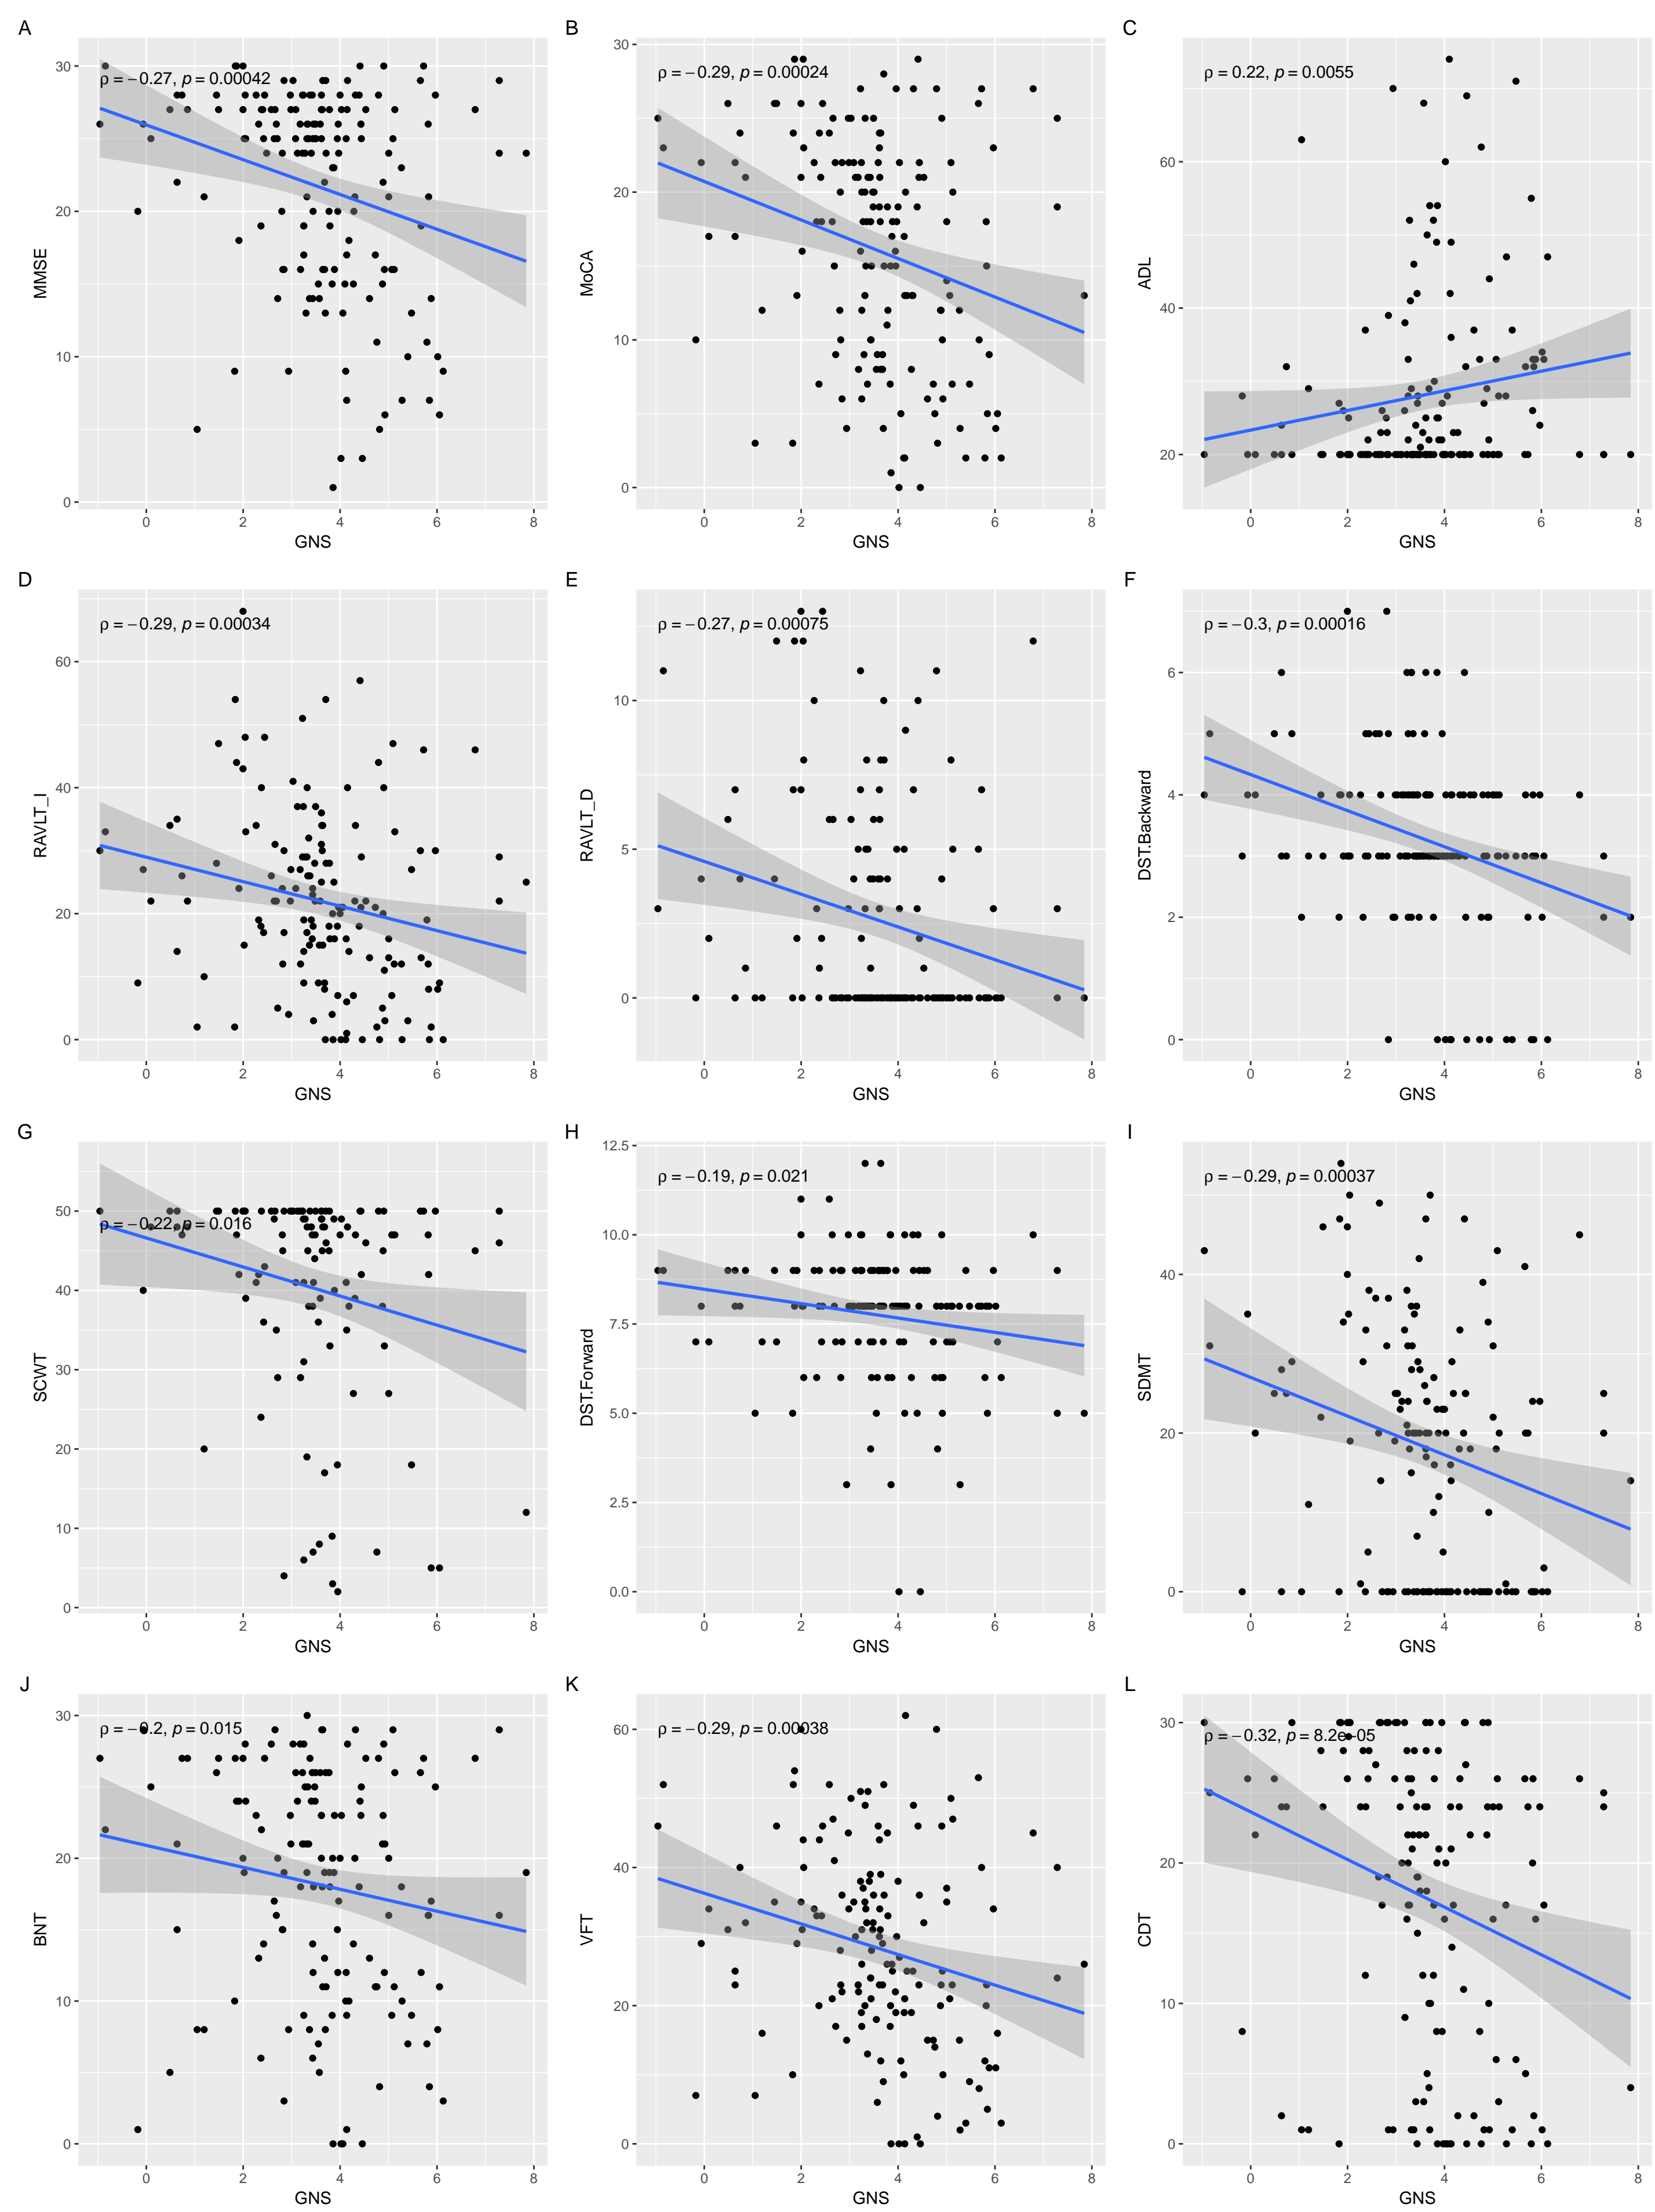

Supplement: MOESM5 [file 26264902]

A

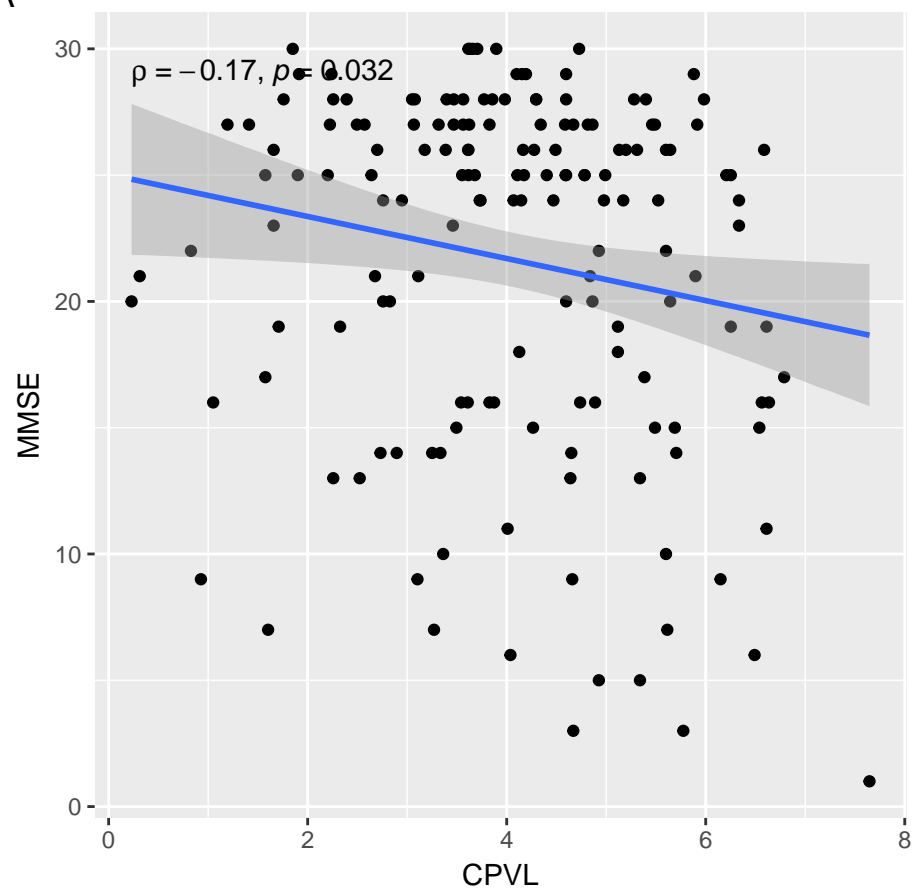

B

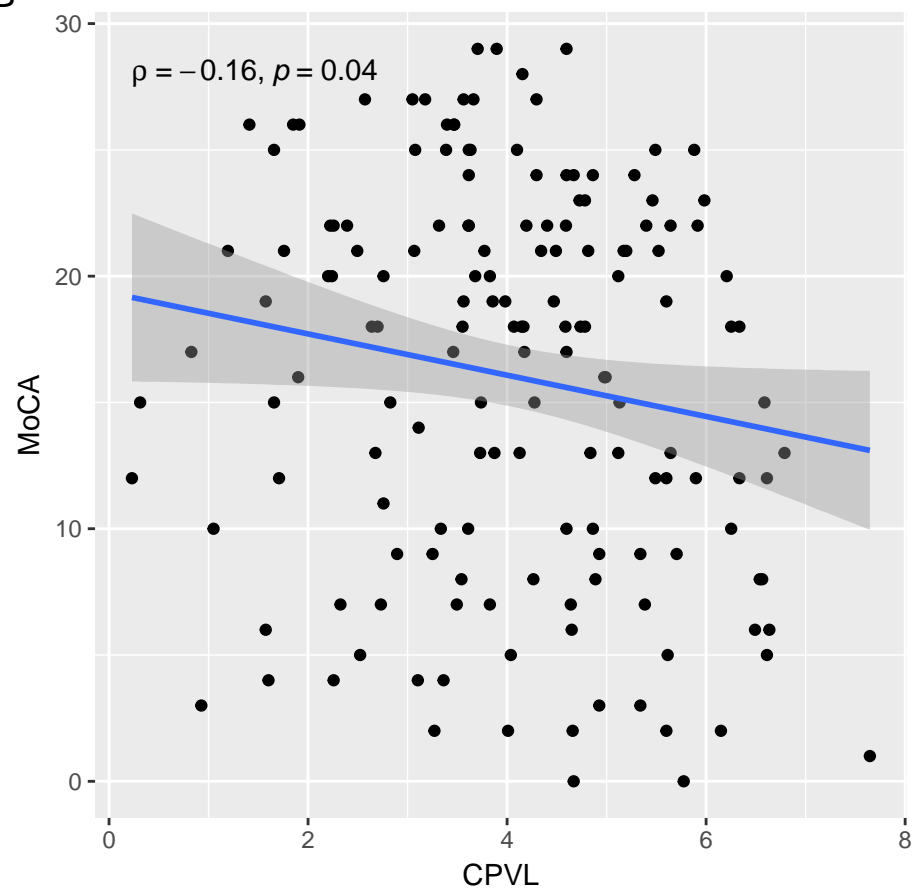

C

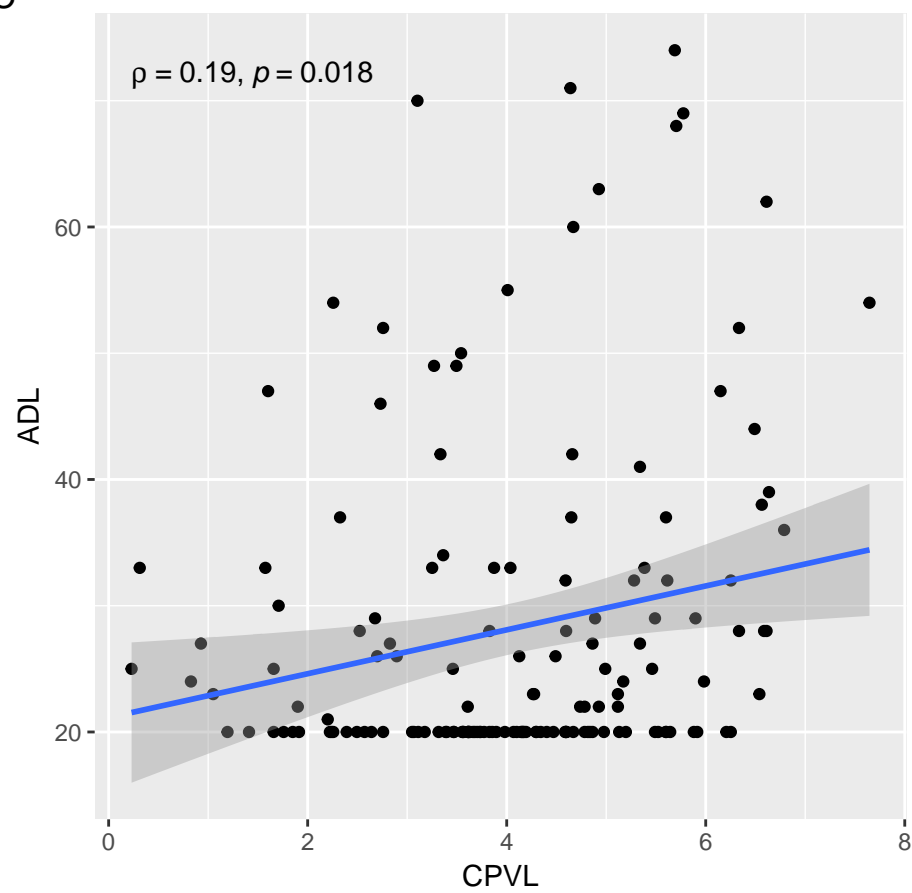

D

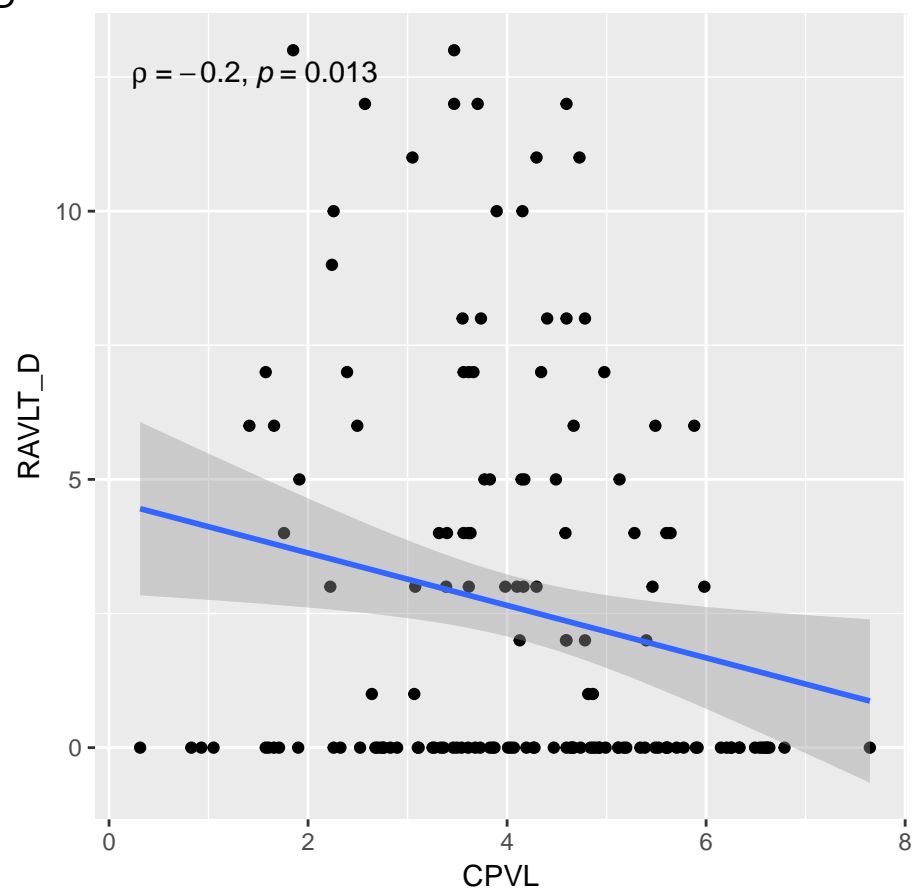

Supplement: MOESM5 [file 26264902]

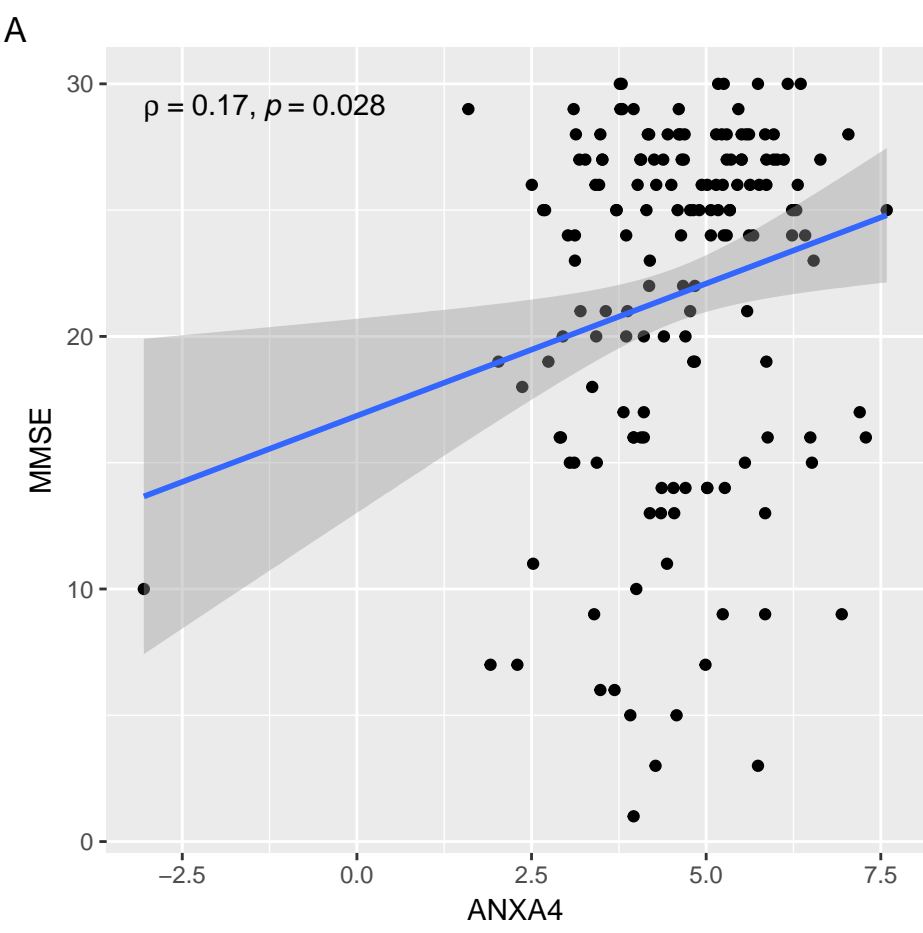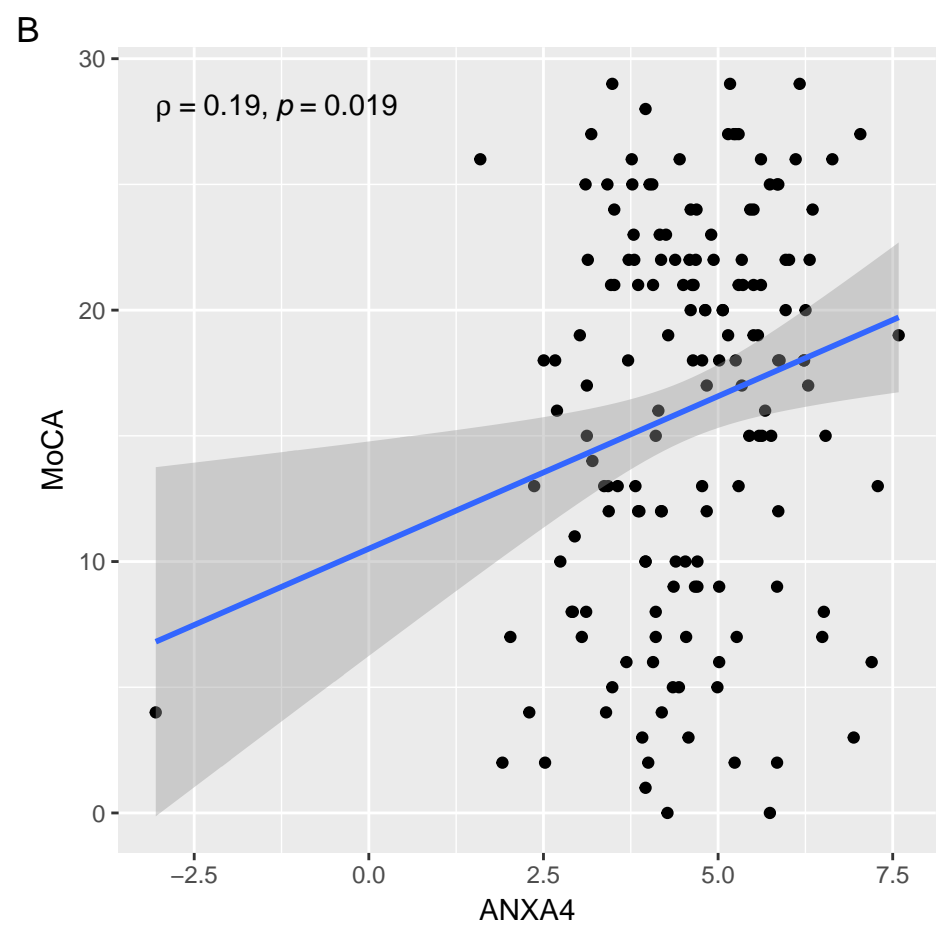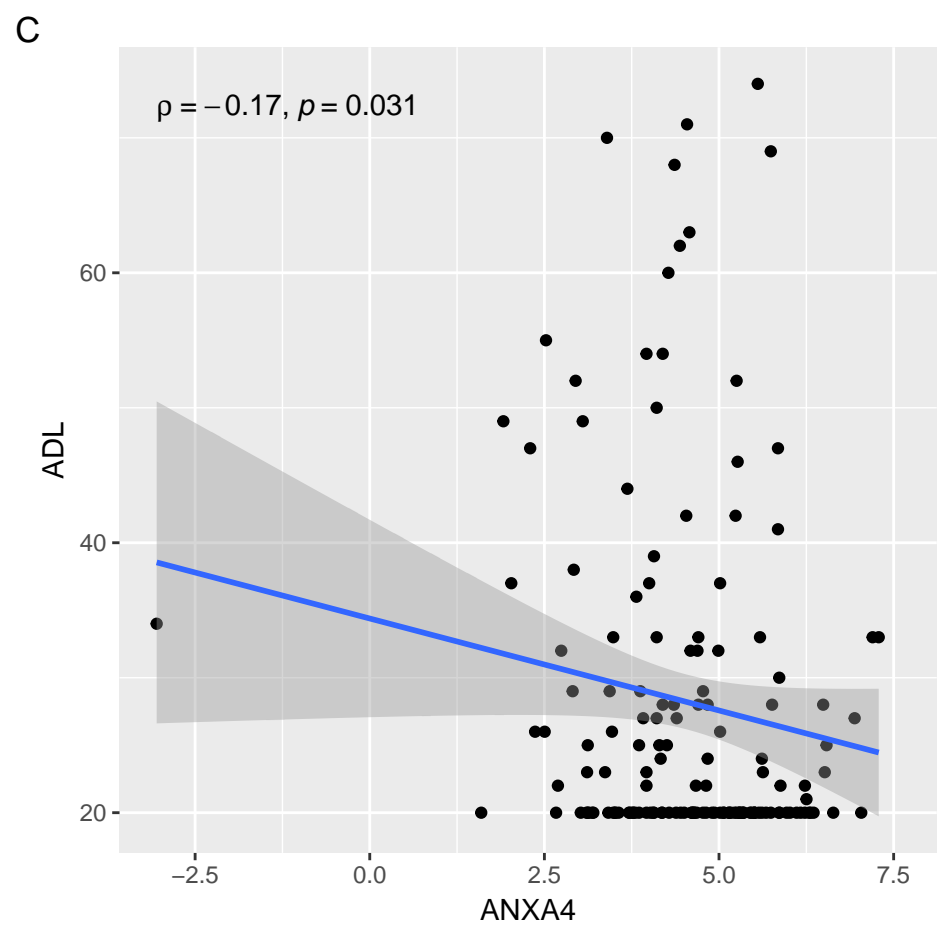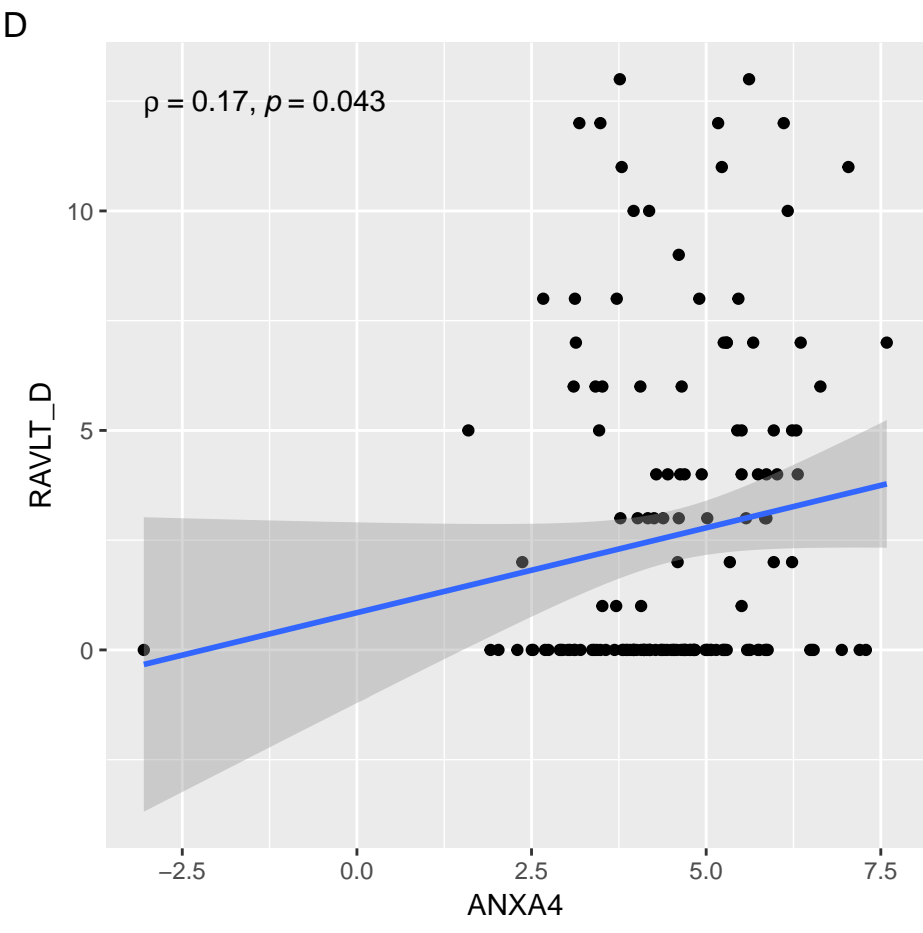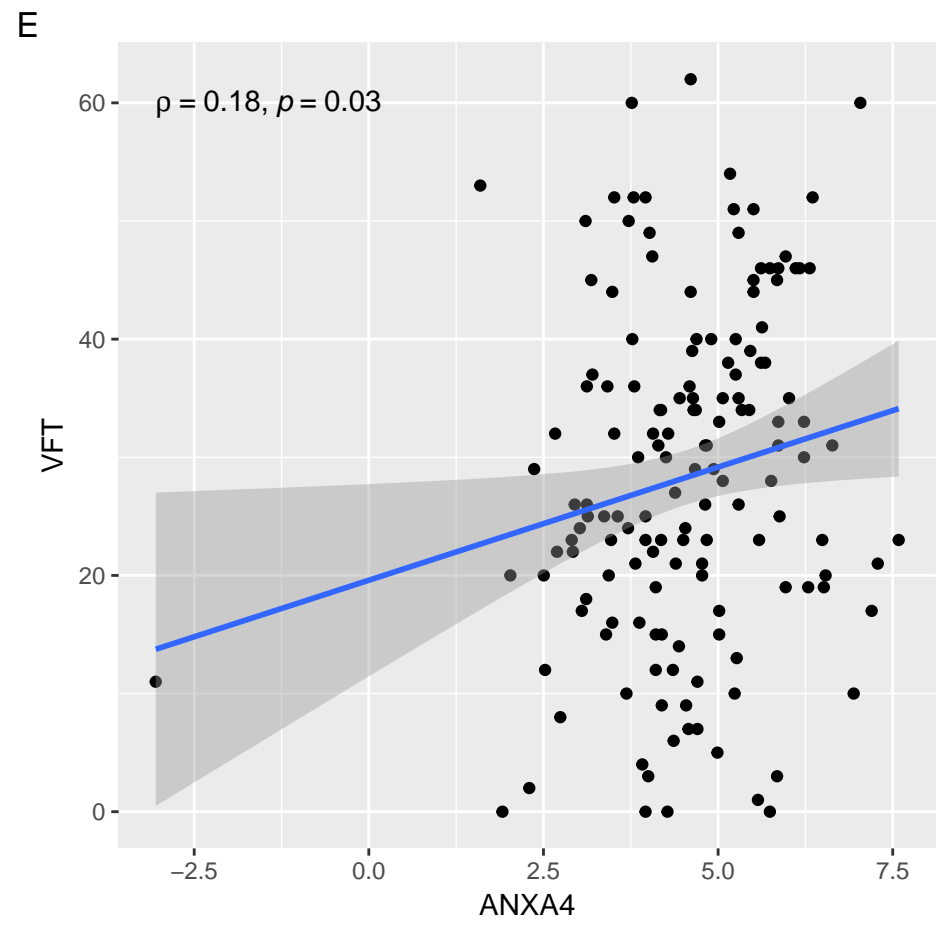

Supplement: MOESM5 [file 26264902]

A

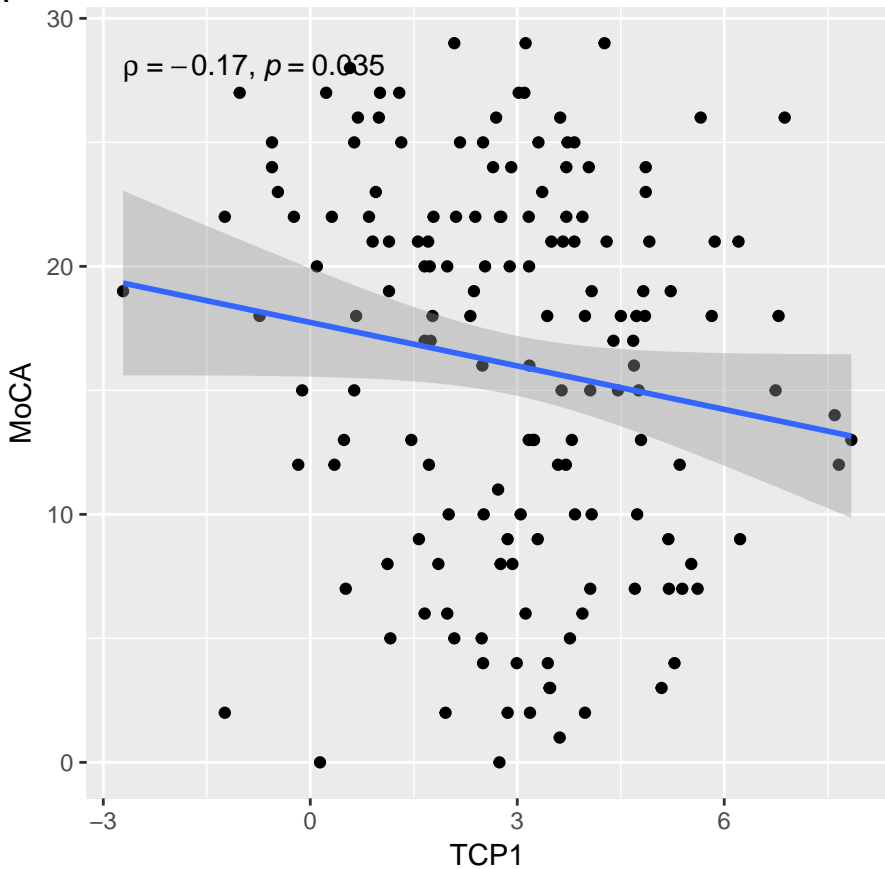

Supplement: MOESM5 [file 26264902]

A

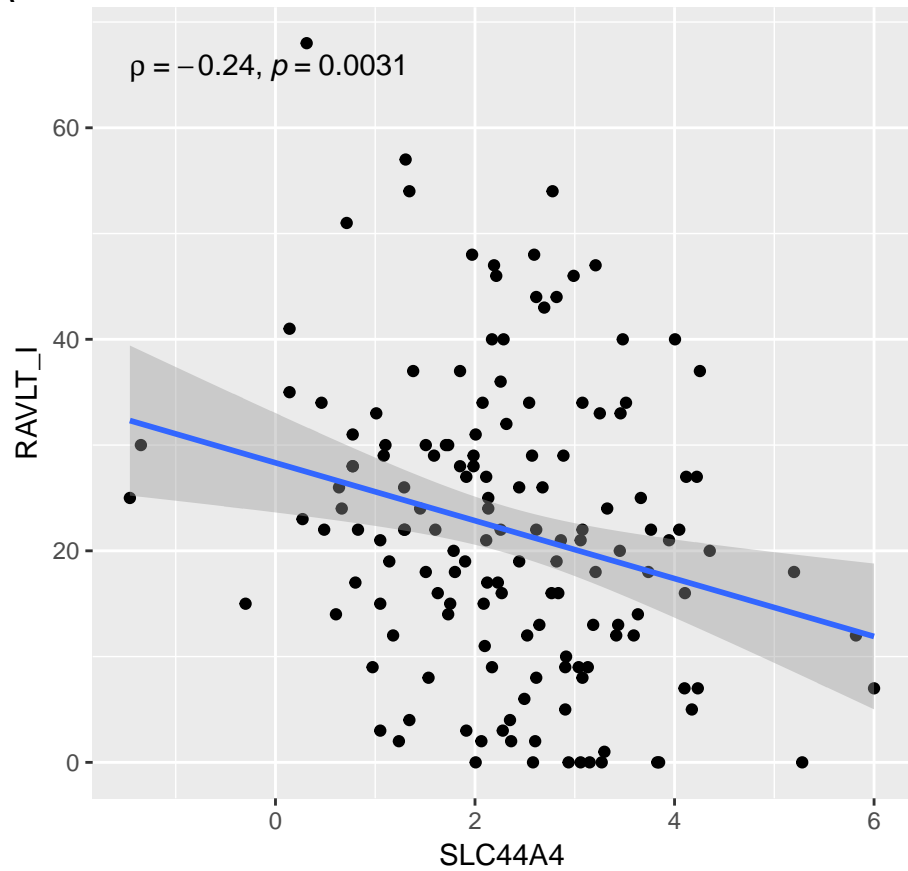

B

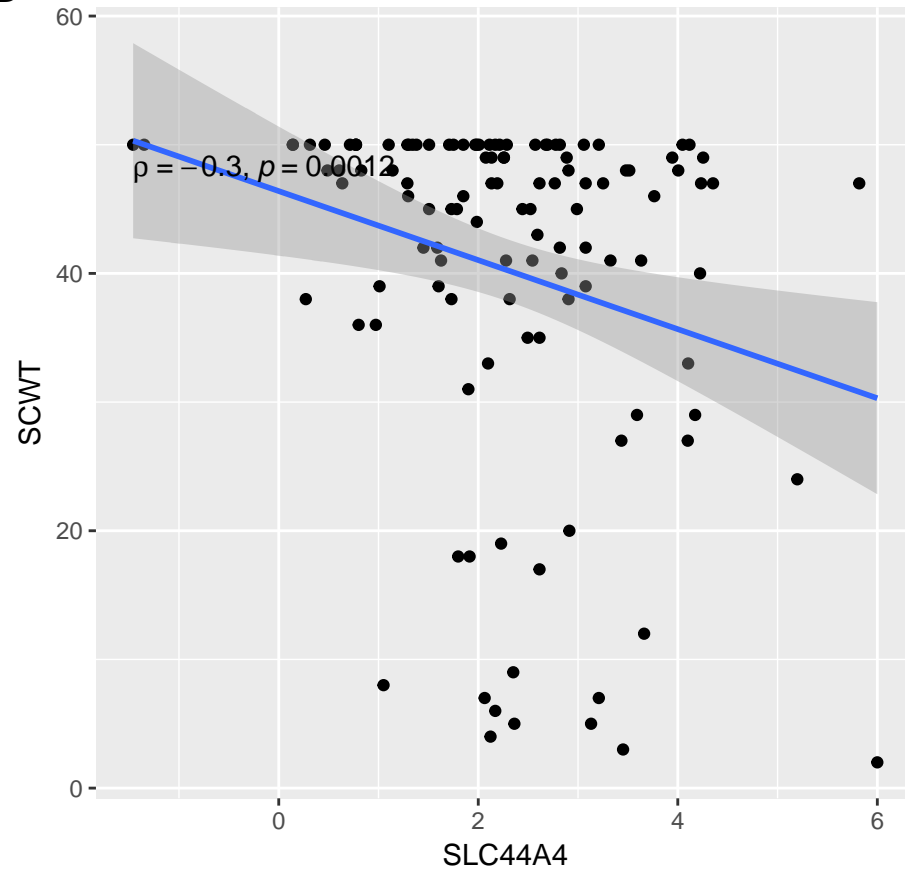

C

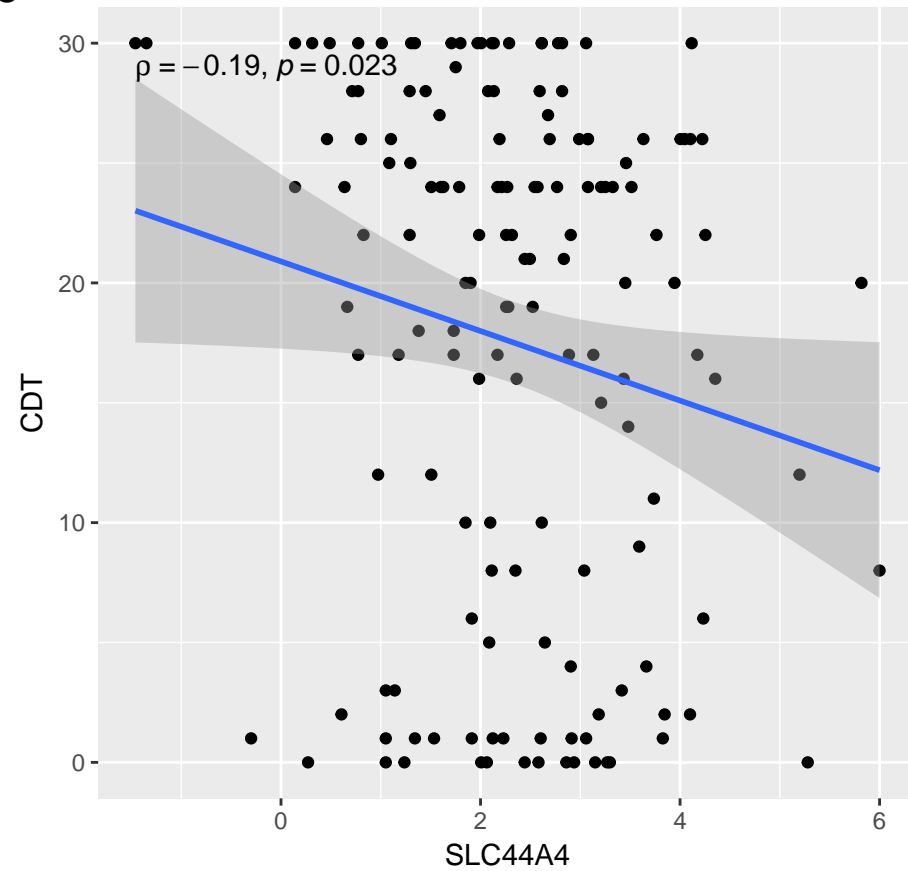

Supplement: MOESM5 [file 26264902]

A

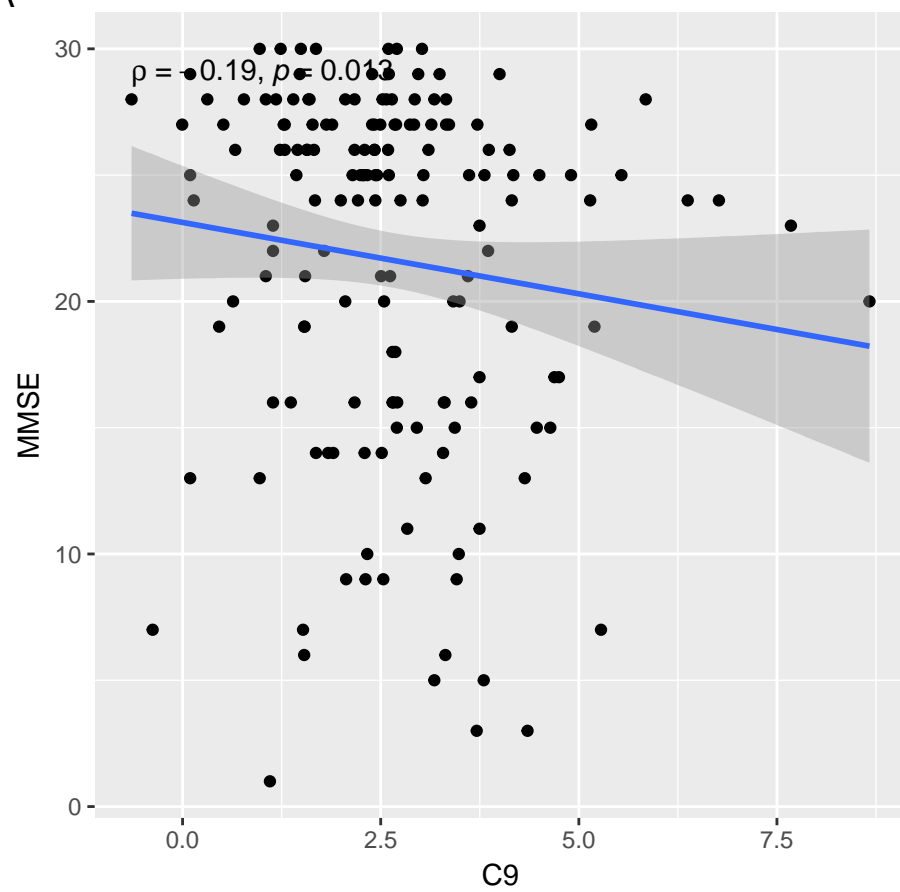

B

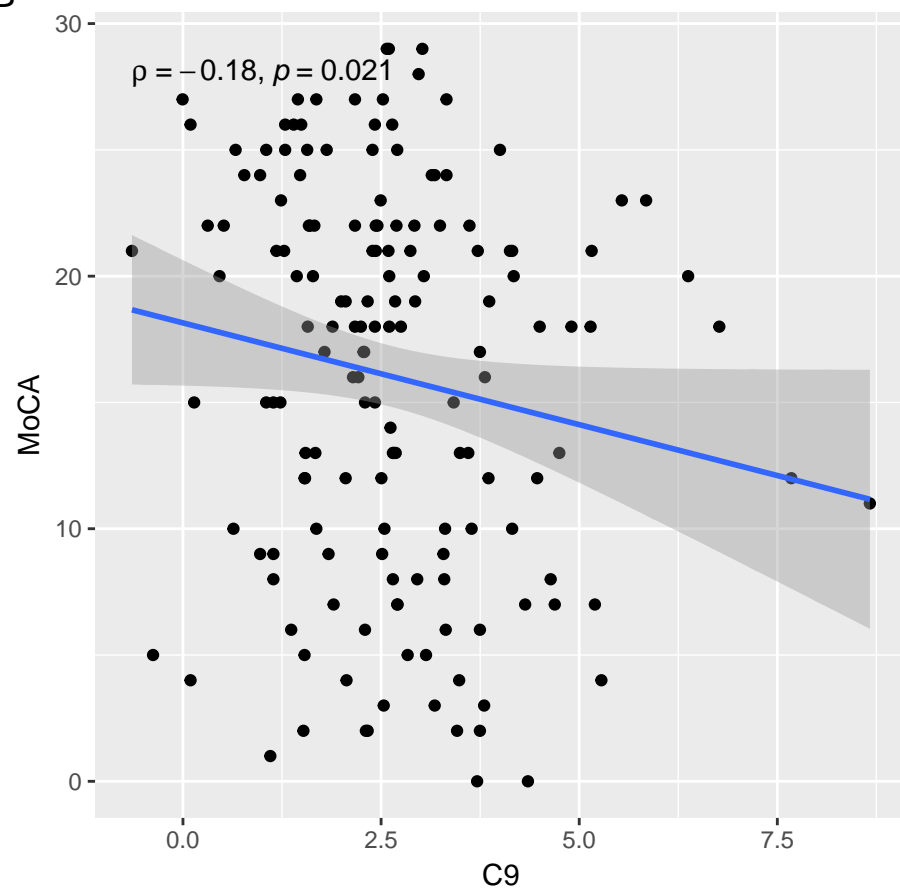

C

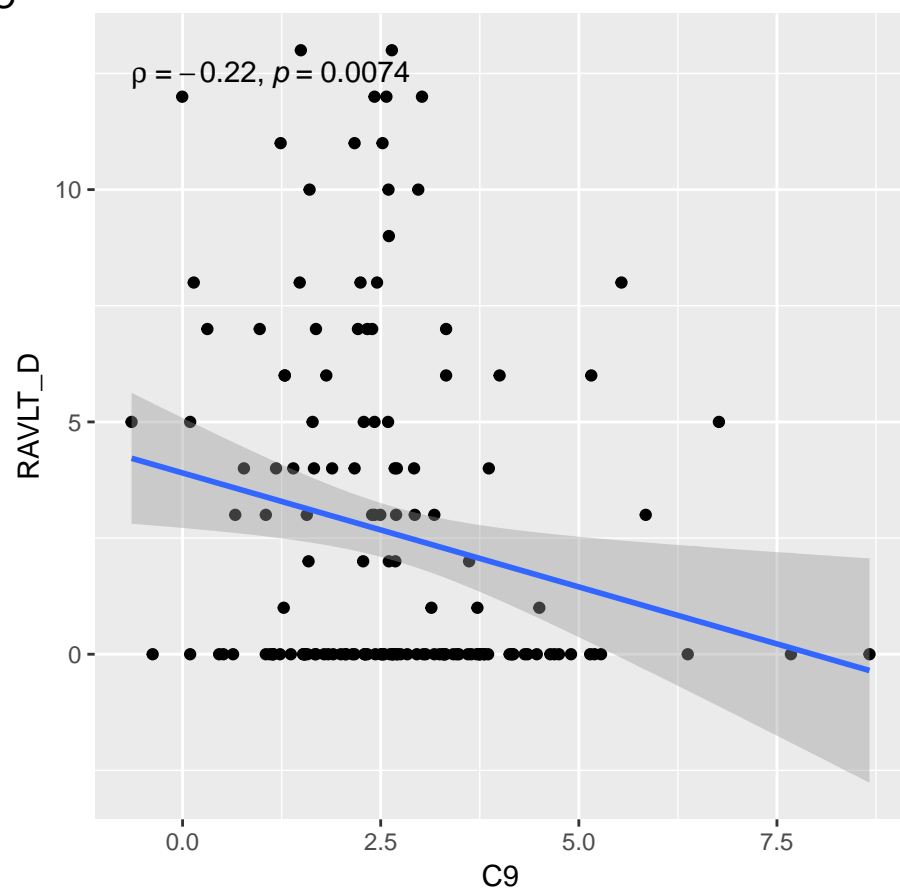

D

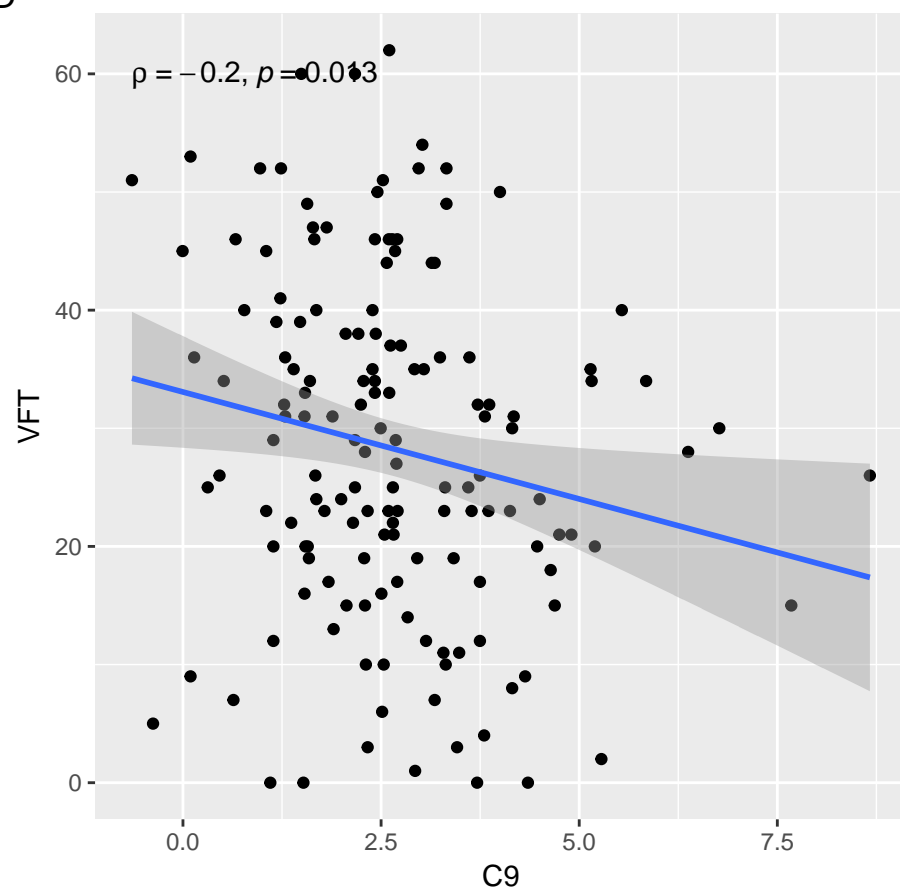

Supplement: MOESM5 [file 26264902]

**A**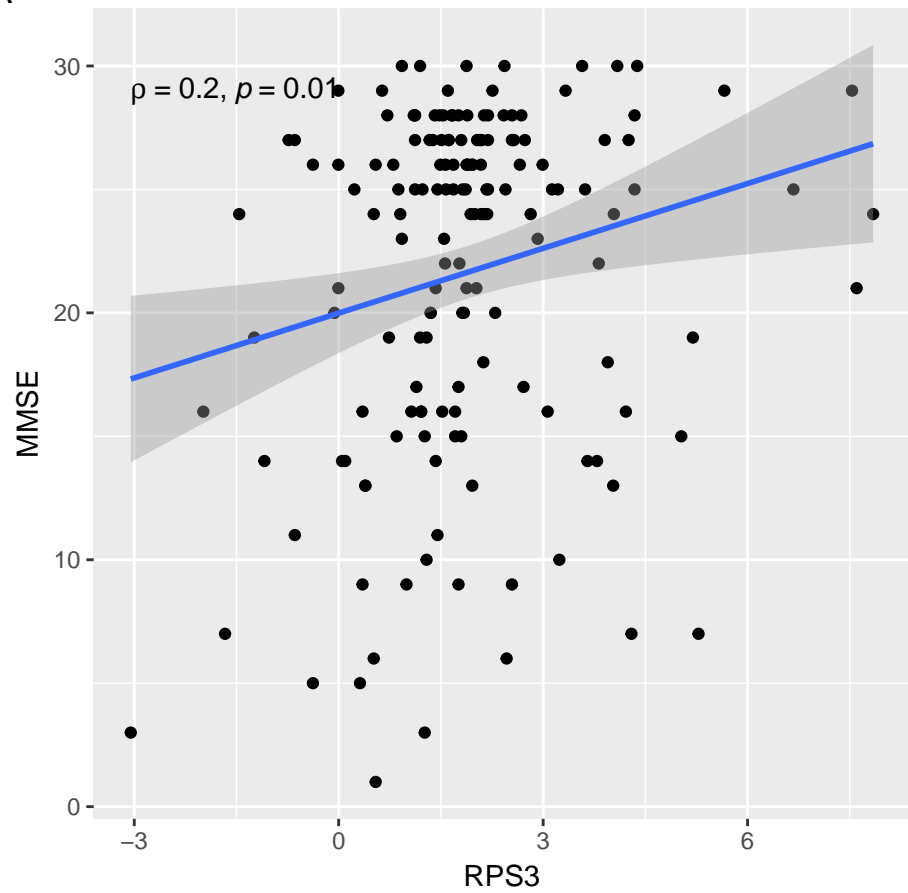**B**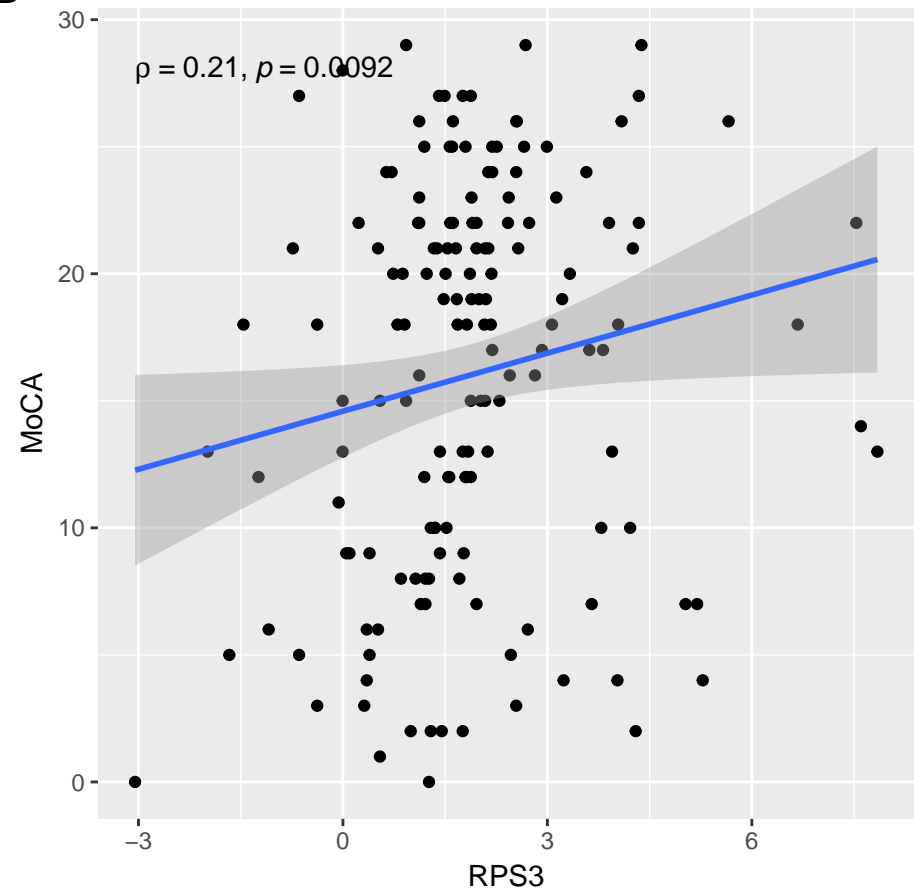**C**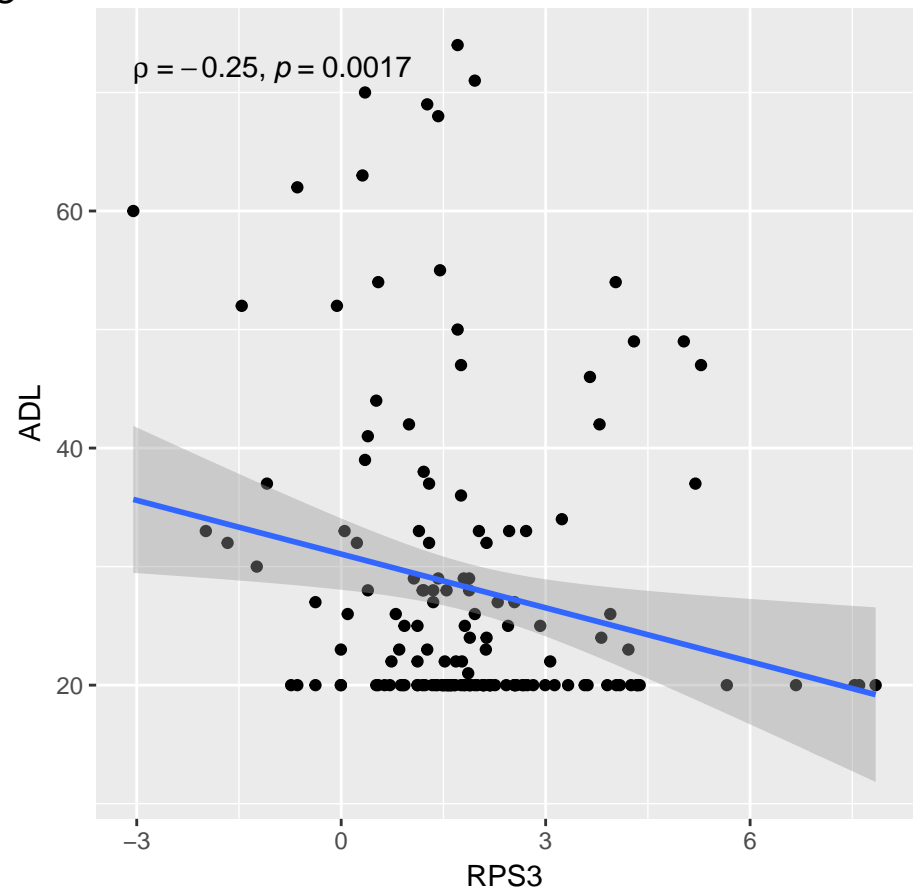**D**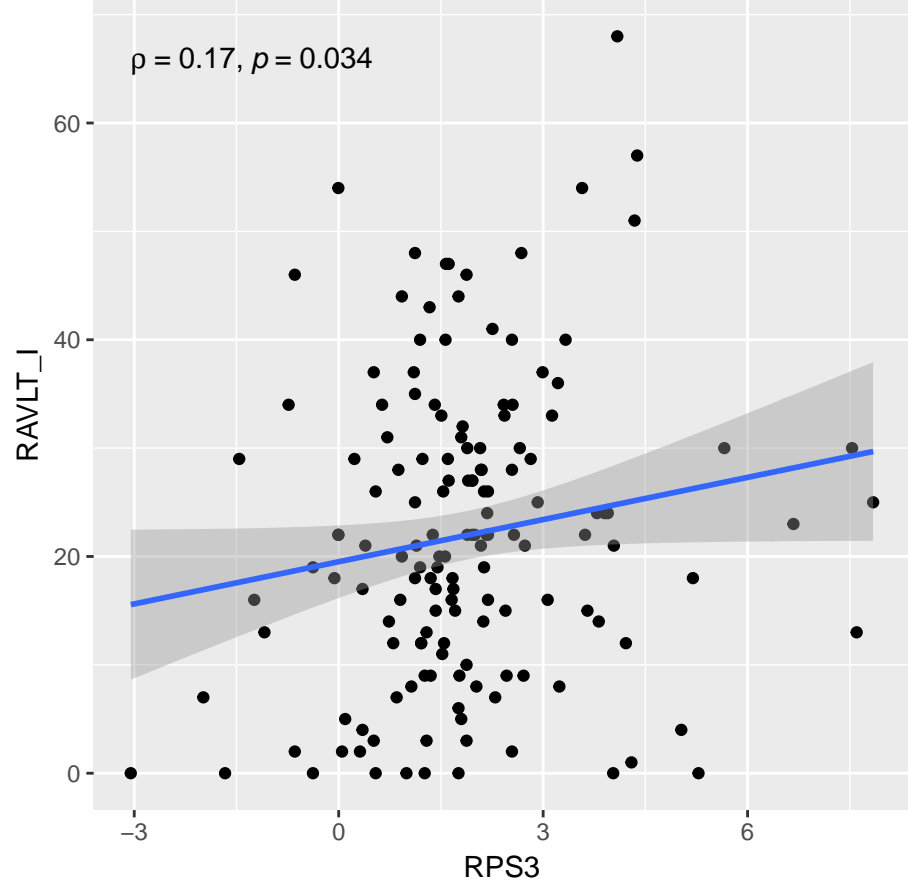**E**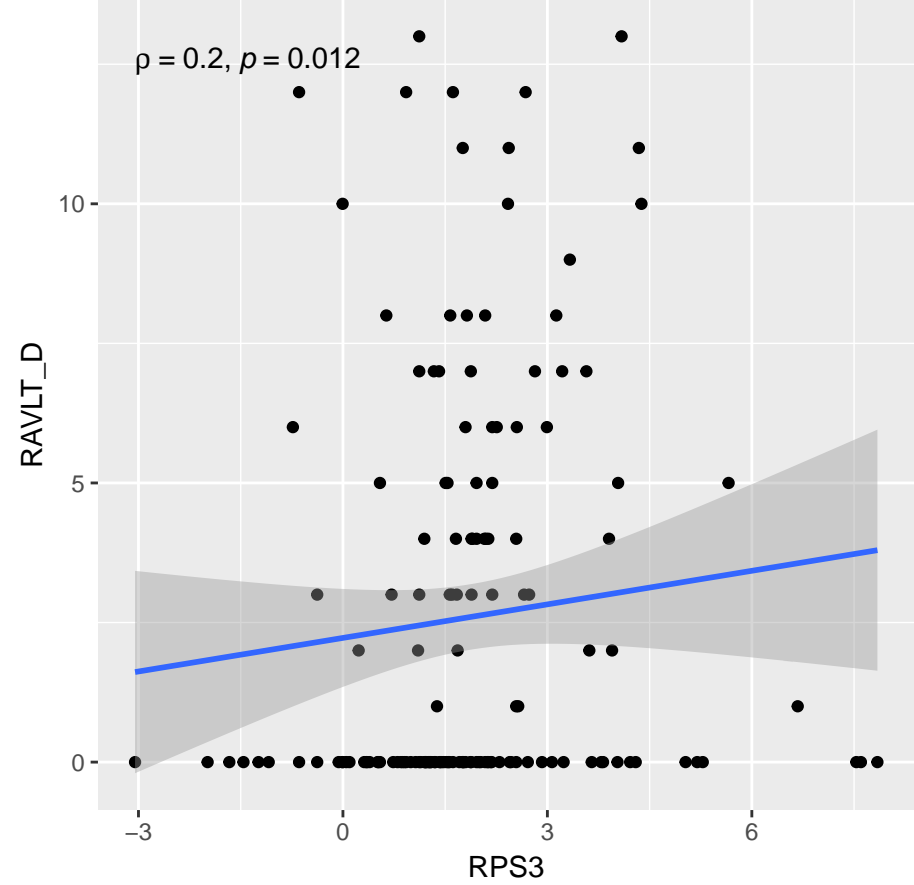**F**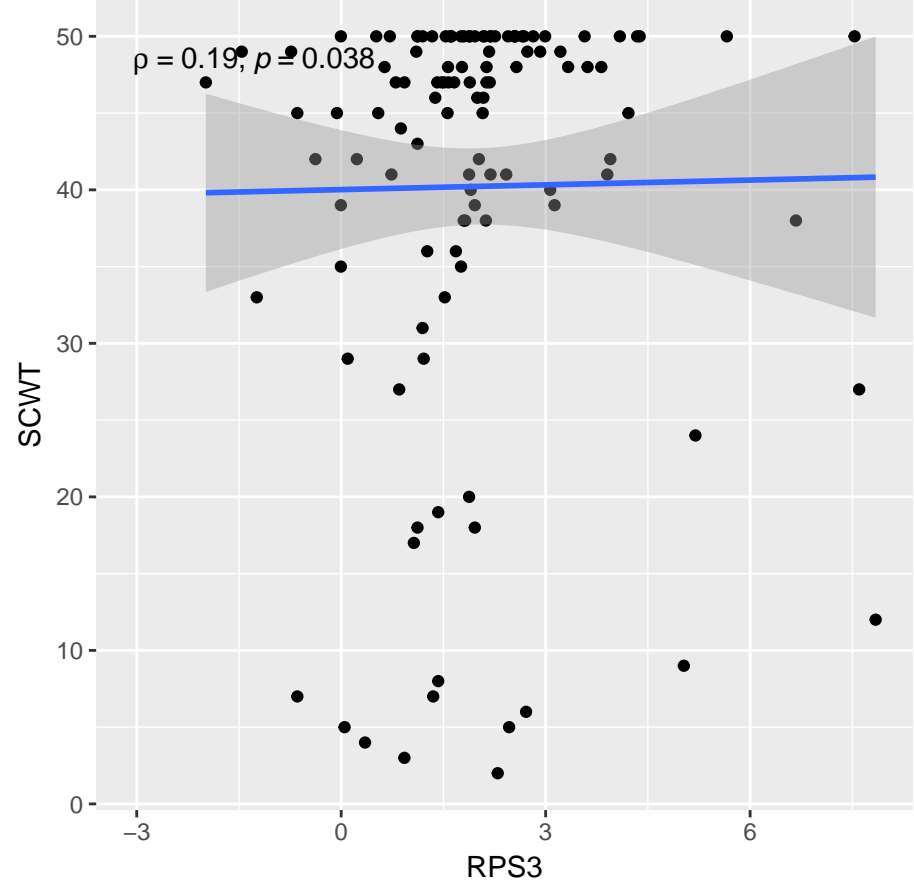**G**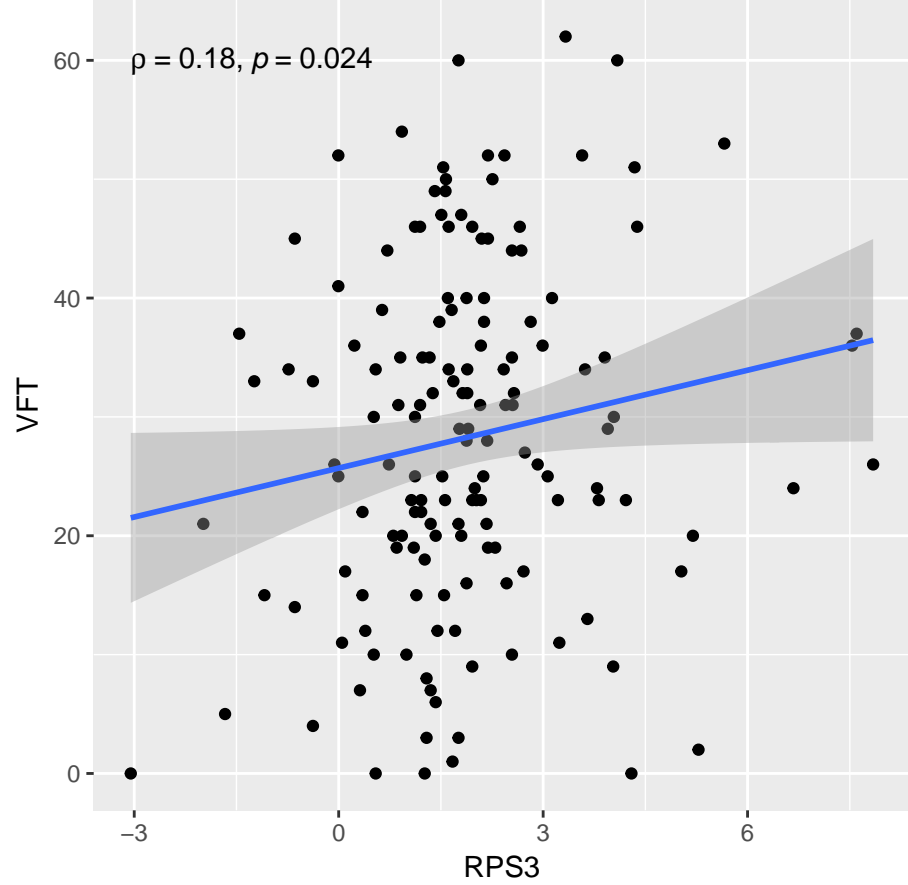

Supplement: MOESM5 [file 26264902]

A

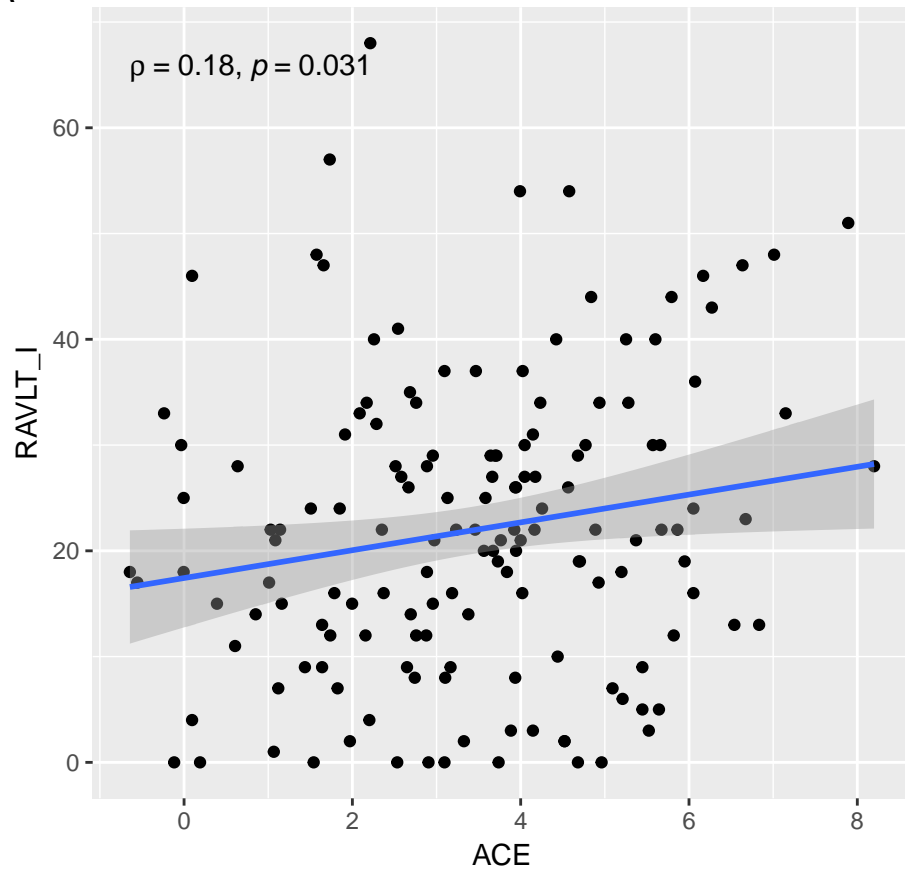

B

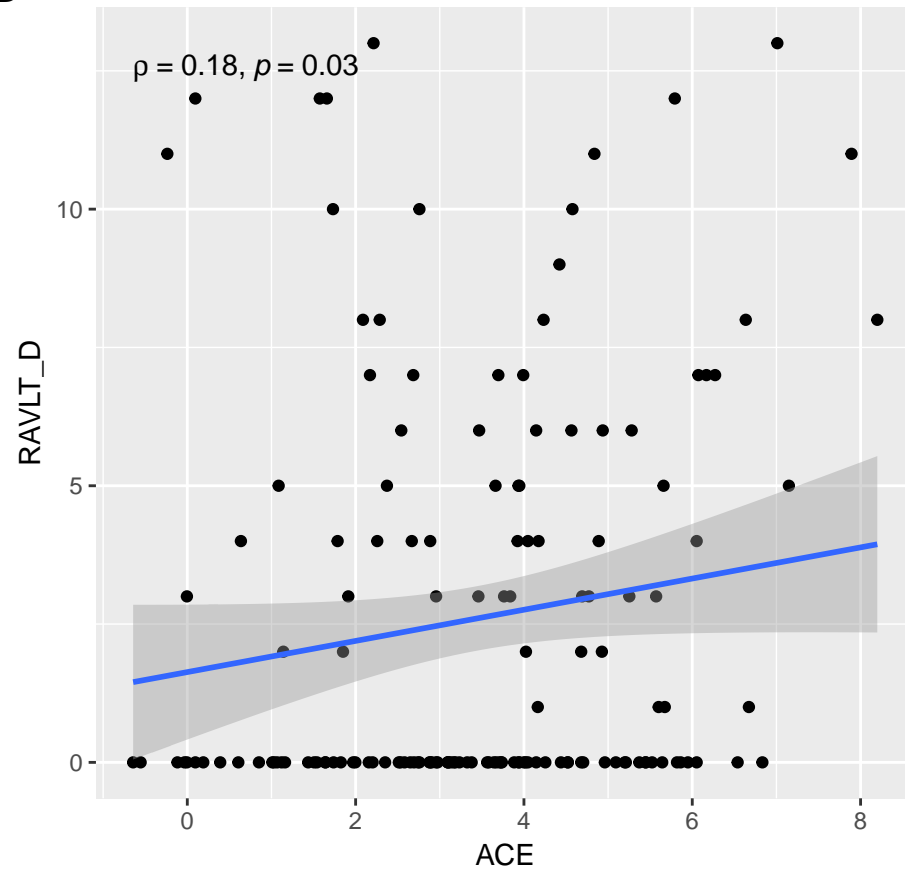

C

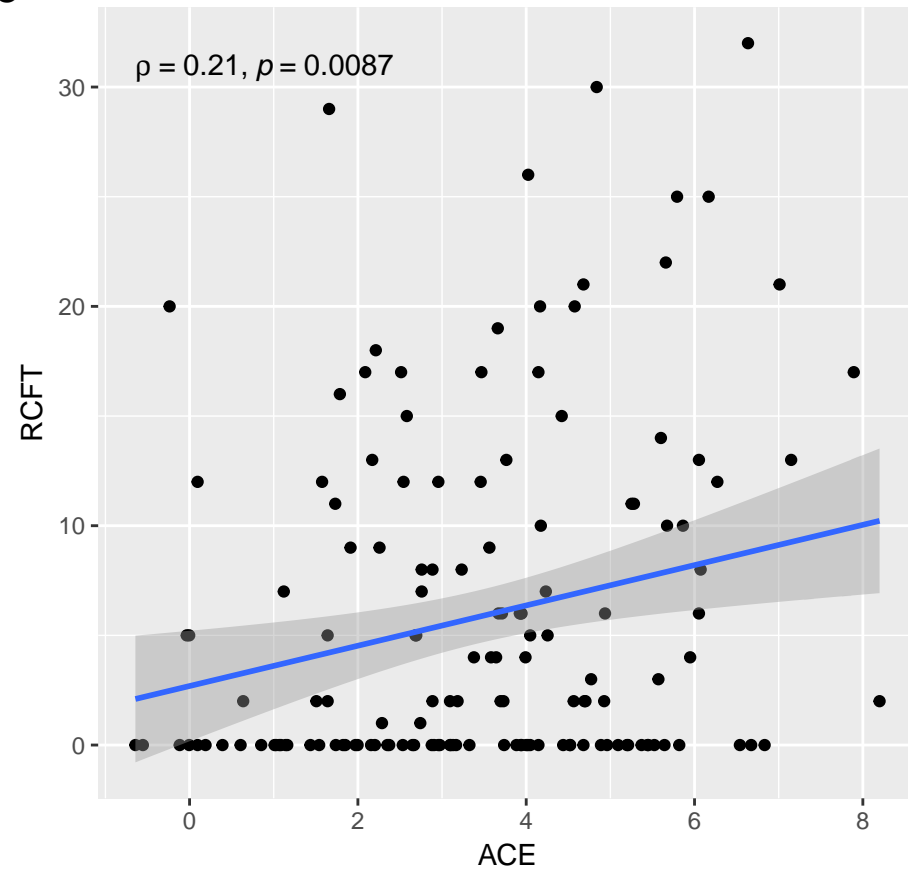

Supplement: MOESM5 [file 26264902]

**A**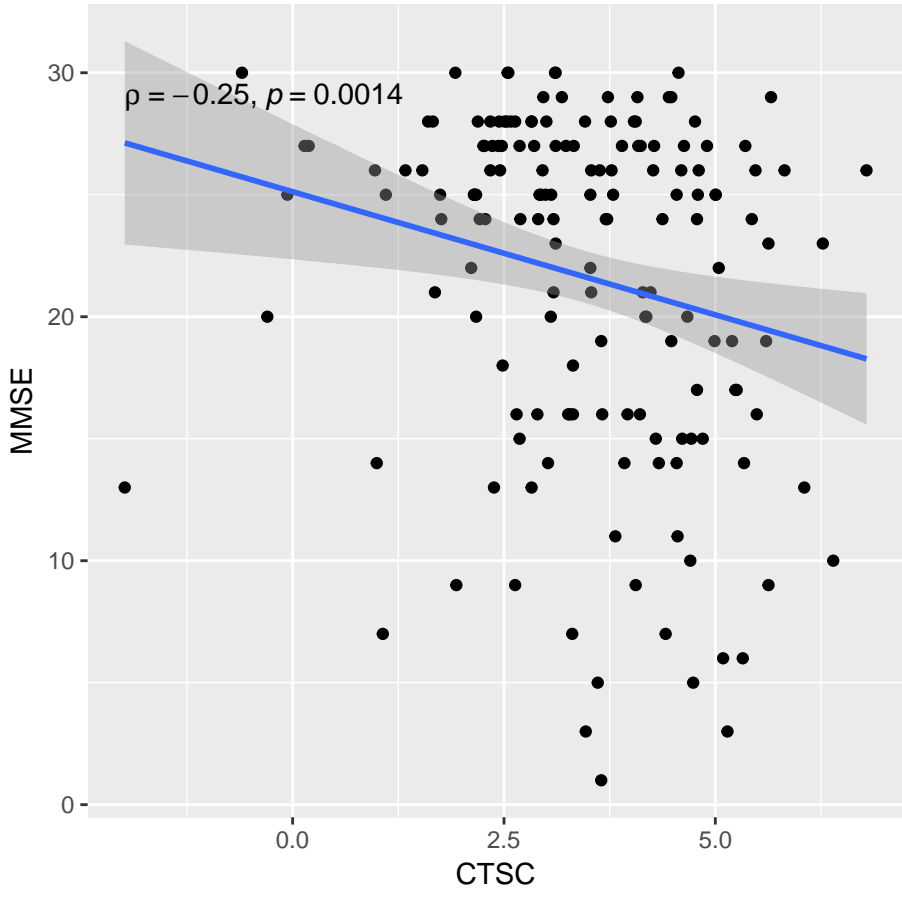**B**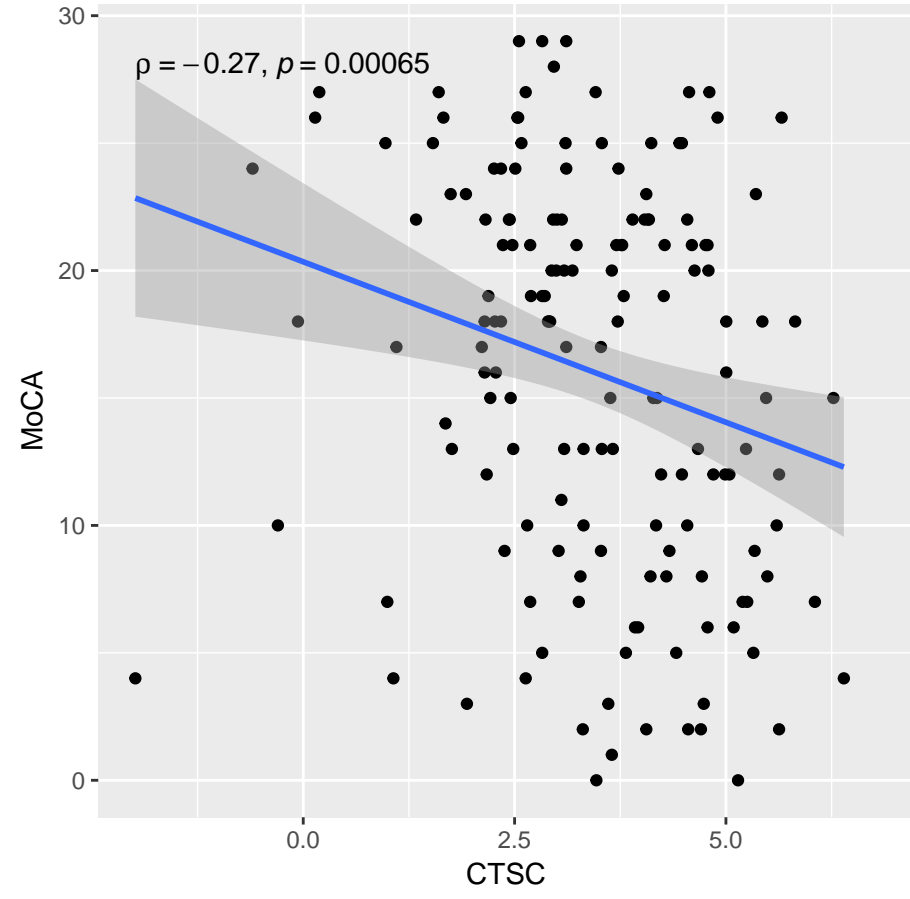**C**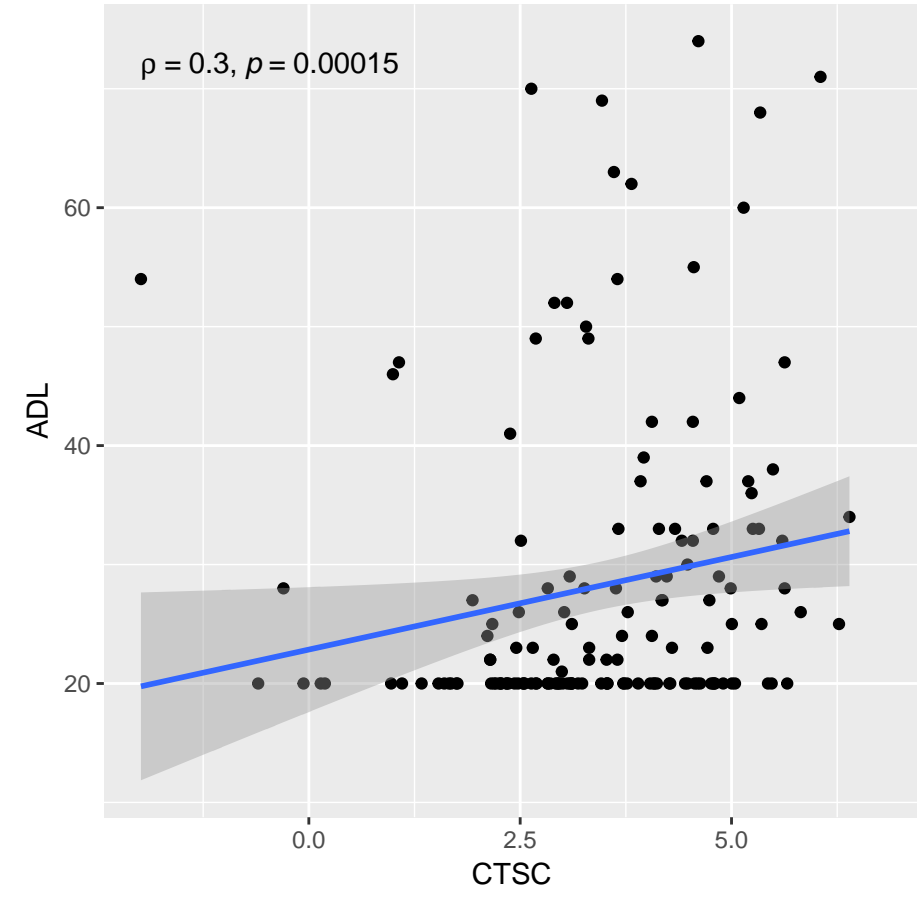**D**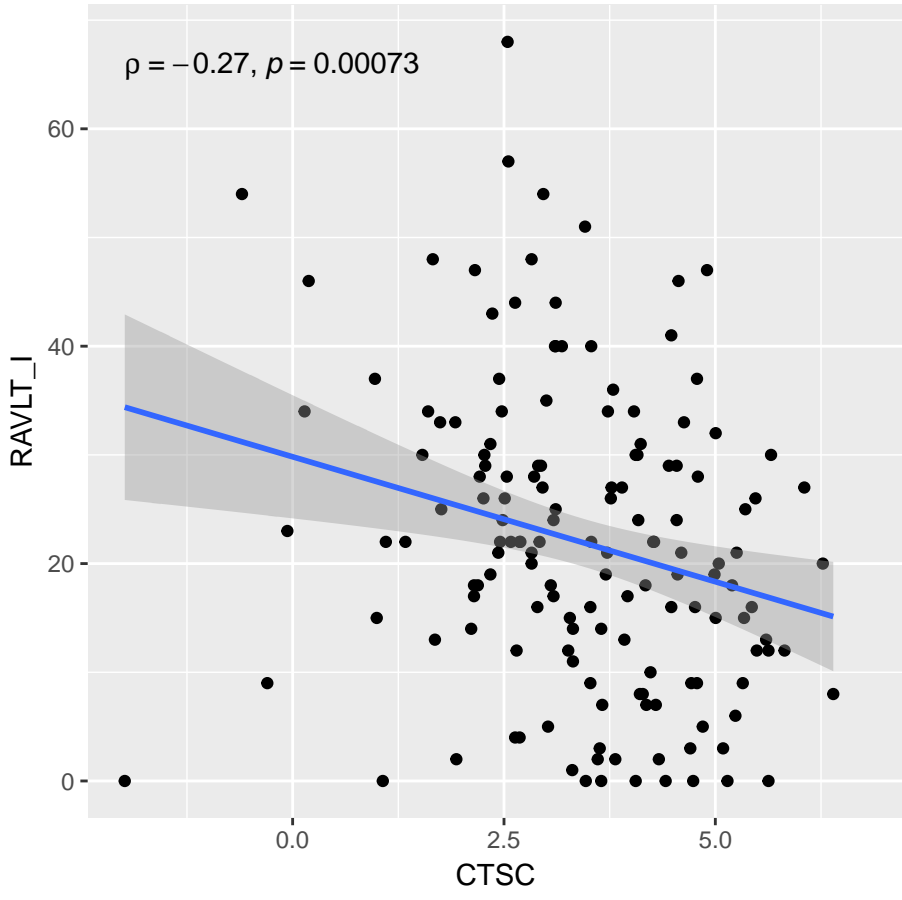**E**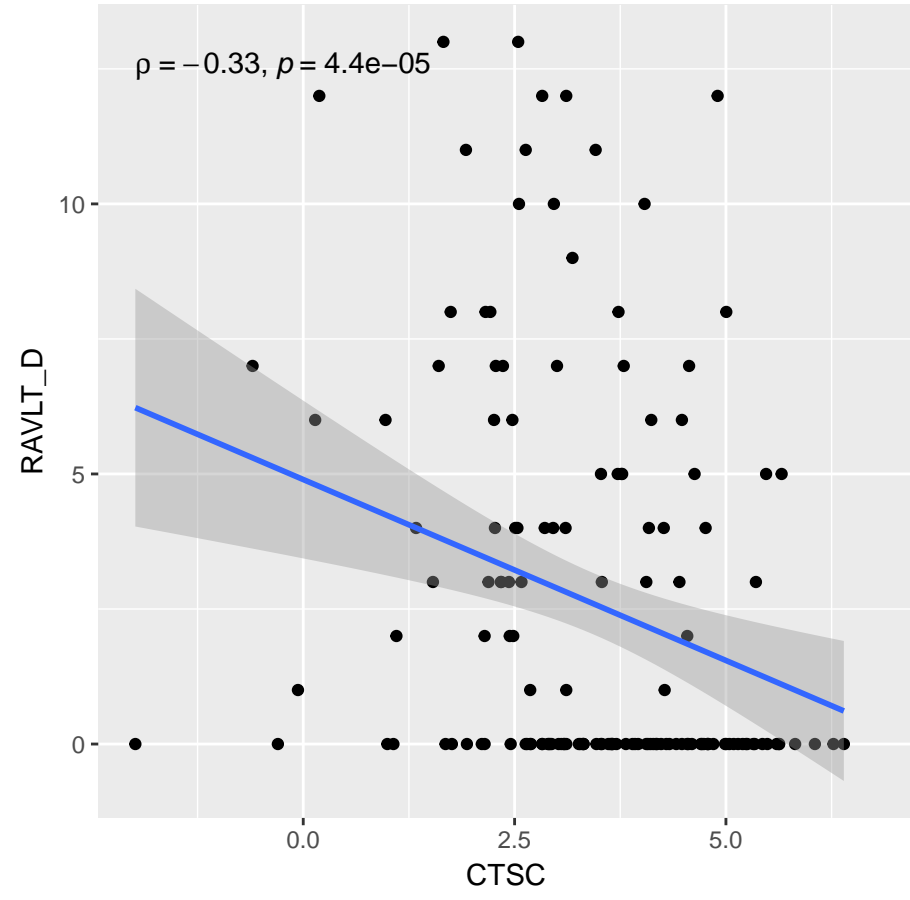**F**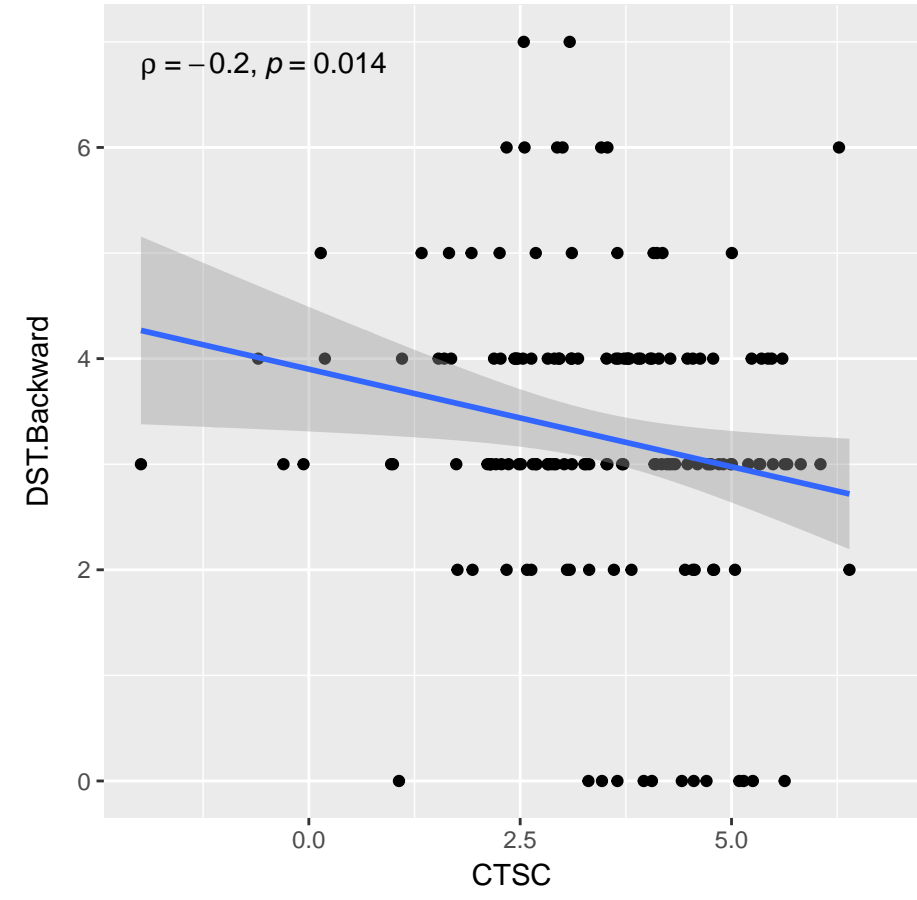**G**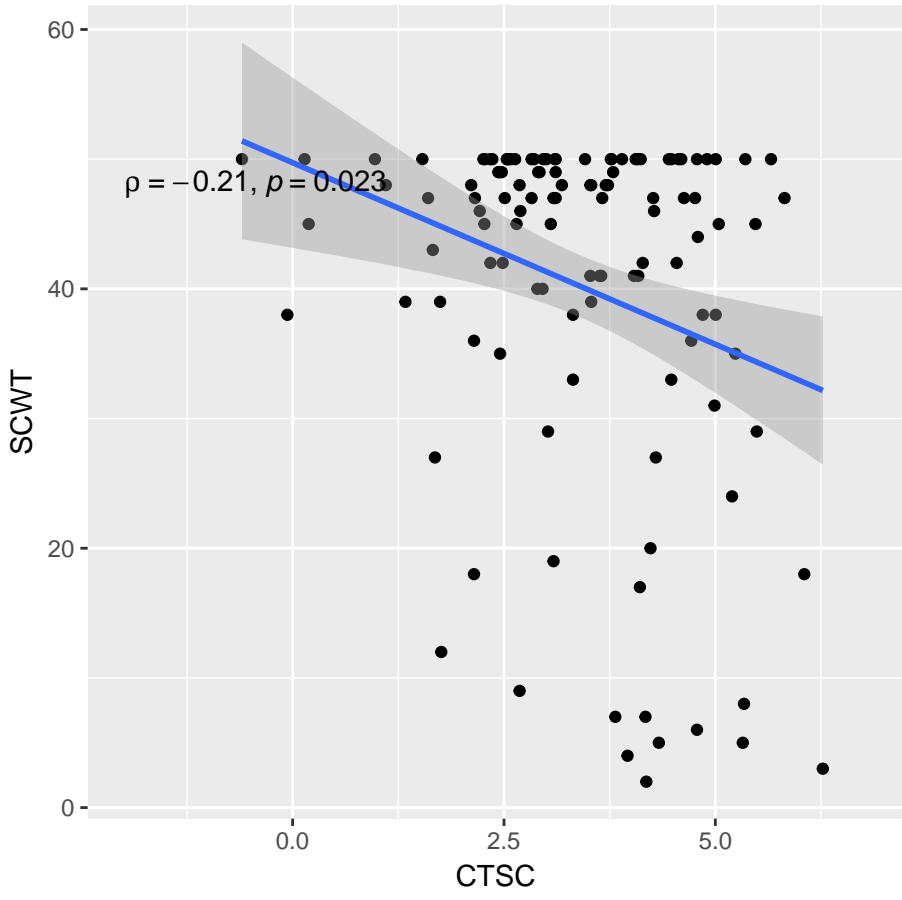**H**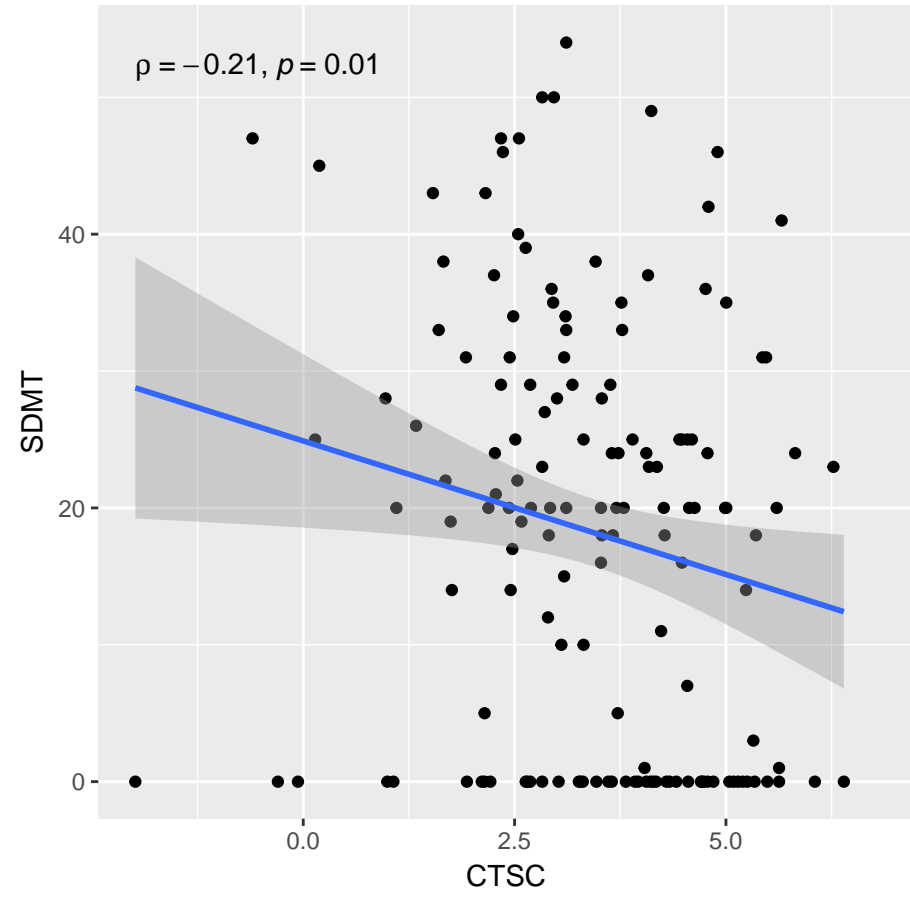**I**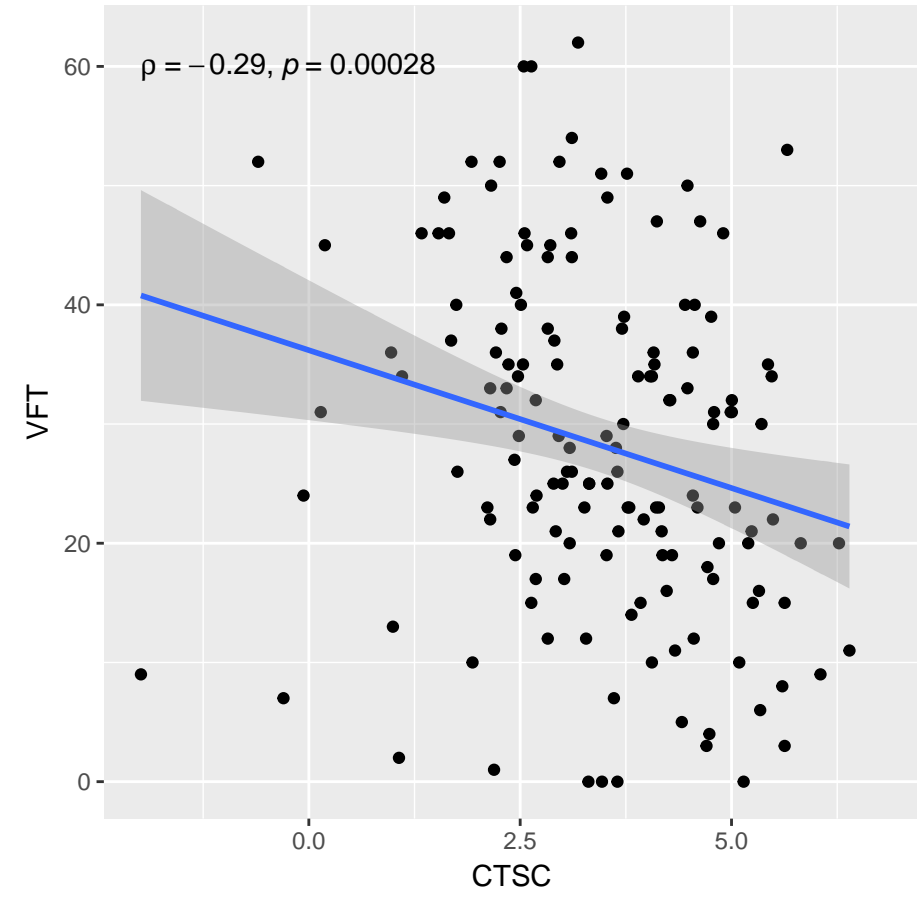**J**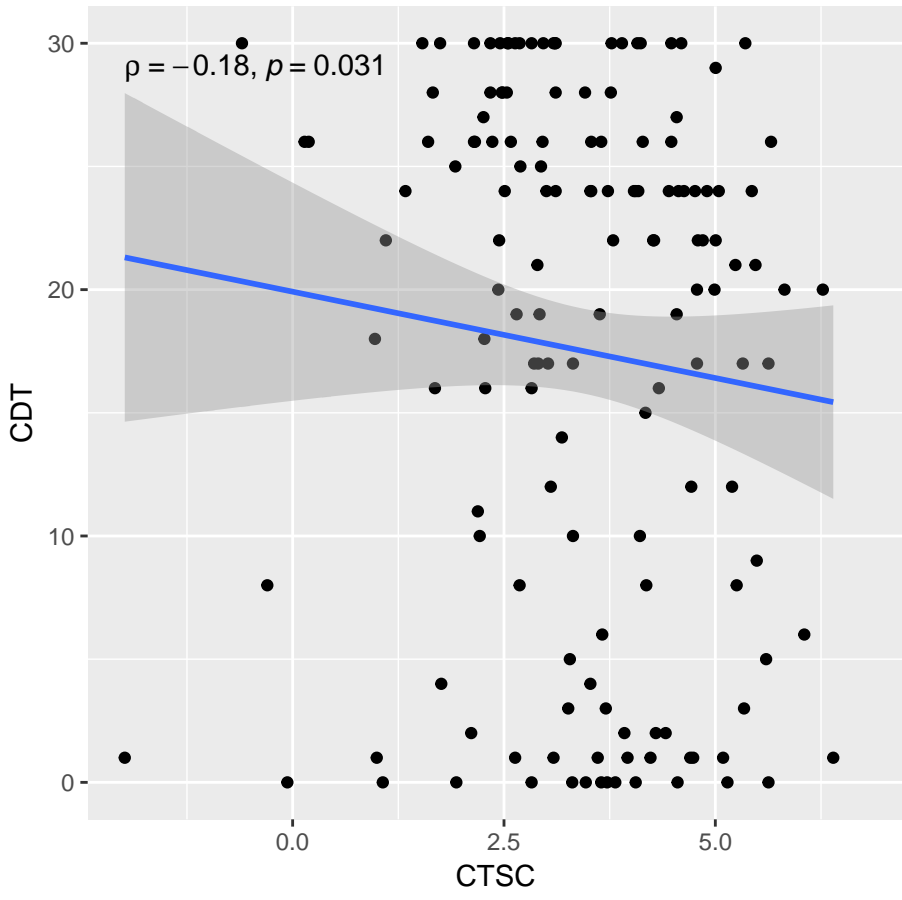

Supplement: MOESM5 [file 26264902]
